# Supplementary material for: Substrate-directed chemo- and regioselective synthesis of polyfunctionalized trifluoromethylarenesviaorganocatalytic benzannulation
Source: Royal Society of Chemistry journal article supplement (doi:10.1039/c9qo01436e), 2019-12-30

**Substrate-directed chemo- and regioselective synthesis of  
polyfunctionalized trifluoromethylarenes via  
organocatalytic benzannulation**

Yan-Ling Ji, ‡<sup>a</sup> Xiang-Hong He, ‡<sup>a</sup> Guo Li,<sup>a</sup> Yue-Yan Ai,<sup>a</sup> He-Ping Li,<sup>a</sup>  
Cheng Peng\*<sup>a</sup> and Bo Han\*<sup>a</sup>

<sup>a</sup> *Hospital of Chengdu University of Traditional Chinese Medicine, State Key Laboratory of Southwestern Chinese Medicine Resources, School of Pharmacy, Chengdu University of Traditional Chinese Medicine, Chengdu 611137, People's Republic of China.*  
*E-mail: pengcheng@cdutcm.edu.cn or hanbo@cdutcm.edu.cn*

‡ These authors contributed equally to this work.

**Supplementary Information**

**Table of contents**

|                                                                                                                      |            |
|----------------------------------------------------------------------------------------------------------------------|------------|
| <b>1. General experimental information.....</b>                                                                      | <b>S1</b>  |
| <b>2. Optimization of the reaction condition of 2-benzylidenemalononitrile 1a and CF<sub>3</sub>-alkene 2a .....</b> | <b>S2</b>  |
| <b>3. Optimization of the reaction condition of 4a and CF<sub>3</sub>-alkene 2a .....</b>                            | <b>S3</b>  |
| <b>4. General procedure for the preparation of trifluoromethylarenes 3 and 5 .....</b>                               | <b>S4</b>  |
| <b>5. Control experiments .....</b>                                                                                  | <b>S23</b> |
| <b>6. Procedures for the transformation .....</b>                                                                    | <b>S25</b> |
| <b>7. X-ray crystal data for 3k, 5g, and Int. E.....</b>                                                             | <b>S29</b> |
| <b>8. NMR spectra.....</b>                                                                                           | <b>S32</b> |

## 1. General experimental information

- Unless otherwise noted, all commercially available reagents were used without further purification. All of the solvents were treated according to known methods.
- Column chromatography was performed on silica gel (200-300 mesh). All reactions were monitored by thin layer chromatography (TLC) with silica gel-coated plates and products were visualized using UV light and I<sub>2</sub>.
- Melting points were determined on a Mel-Temp apparatus and were not corrected.
- NMR data were obtained for <sup>1</sup>H at 400 MHz, 600 MHz or 700 MHz, and for <sup>13</sup>C at 100 MHz, 150 MHz or 175 MHz. Chemical shifts were reported in ppm from tetramethylsilane using solvent resonance in CDCl<sub>3</sub> solution as the internal standard.
- High resolution mass spectra (HRMS) were recorded on a Waters SYNAPT G2 or Agilent G1969-85000 using an electrospray (ESI) ionization source.
- 2-benzylidenemalononitriles **1** were synthesized following the literature procedure.<sup>1</sup> Tri-substituted CF<sub>3</sub>-alkenes **2** were synthesized following the literature procedure.<sup>2</sup> (E)-2-Nitroallylic acetates **4** were synthesized following the literature procedure.<sup>3</sup>
- The relative configuration of compounds **3k**, **5g** and **Int. E** were determined unequivocally according to the X-ray diffraction analysis, and those of other products were deduced on the basis of these results.

- 
1. G. Kaupp, M. Reza Naimi-Jamal and J. Schmeyers, *Tetrahedron*, 2003, **59**, 3753.
  2. X. H. He, L. Yang, Y. L. Ji, Q. Zhao, M. C. Yang, W. Huang, C. Peng and B. Han, *Chem. Eur. J.*, 2018, **24**, 1947.
  3. (a) E. Gopi and I. N. Namboothiri, *J. Org. Chem.*, 2014, **79**, 7468; (b) W. Xiao, X. Yin, Z. Zhou, W. Du and Y. C. Chen, *Org. Lett.*, 2016, **18**, 116; (c) Y. Zheng, L. Cui, Y. Wang and Z. J. Zhou, *Org. Chem.*, 2016, **81**, 4340; (d) J. Y. Liu, J. Zhao, J. L. Zhang and P. F. Xu, *Org. Lett.*, 2017, **19**, 1846; (e) J. Zhang, G. Yin, Y. Du, Z. Yang, Y. Li and L. Chen, *J. Org. Chem.*, 2017, **82**, 13594; (f) D. Enders, L. Zhao and G. Raabe, *Synthesis*, 2018, **51**, 1391.

## 2. Optimization of the reaction condition of **1a** and CF<sub>3</sub>-alkene **2a**

**Table S1.** Optimization of the reaction of **1a** and CF<sub>3</sub>-alkene **2a**<sup>a</sup>

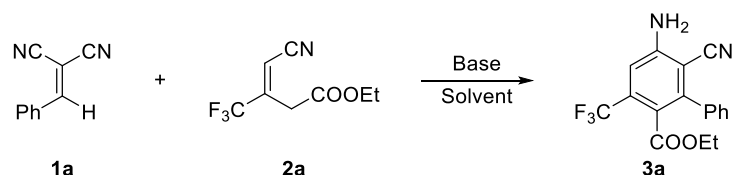

| entry           | solvent    | base                            | yield (%) <sup>b</sup> |
|-----------------|------------|---------------------------------|------------------------|
| <b>1</b>        | <b>DCM</b> | <b>DABCO</b>                    | <b>85</b>              |
| 2               | EtOH       | DABCO                           | 78                     |
| 3               | Tol        | DABCO                           | 60                     |
| 4               | MeCN       | DABCO                           | 74                     |
| 5               | DCM        | DIPEA                           | 67                     |
| 6               | DCM        | TEA                             | 58                     |
| 7               | DCM        | DBU                             | 69                     |
| 8               | DCM        | DMAP                            | 80                     |
| 9               | DCM        | PPh <sub>3</sub>                | 48                     |
| 10              | DCM        | K <sub>2</sub> CO <sub>3</sub>  | 27                     |
| 11              | DCM        | Cs <sub>2</sub> CO <sub>3</sub> | 37                     |
| 12              | DCM        | NaHCO <sub>3</sub>              | 12                     |
| 13              | DCM        | K <sub>2</sub> HPO <sub>4</sub> | 10                     |
| 14 <sup>c</sup> | DCM        | DABCO                           | 67                     |
| 15 <sup>d</sup> | DCM        | DABCO                           | 58                     |
| 16 <sup>e</sup> | DCM        | DABCO                           | 75                     |
| 17 <sup>f</sup> | DCM        | DABCO                           | 68                     |

<sup>a</sup> Unless indicated otherwise, the reaction was performed with 0.2 mmol of **1a**, 0.24 mmol of **2a**, and 0.04 mmol of base in 1 mL solvent at room temperature (monitored by TLC). <sup>b</sup> Yield of isolated **3a**. <sup>c</sup> 0.02 mol DABCO was used. <sup>d</sup> 0.08 mol DABCO was used. <sup>e</sup> The reaction was performed at 0 °C. <sup>f</sup> The reaction was performed at 60 °C.

Initially, 2-benzylidenemalononitriles **1** and CF<sub>3</sub>-alkenes **2** were chosen as model substrates to investigate the feasibility of this protocol (Table S1). Conducting the reaction in dichloromethane at room temperature catalyzed by DABCO efficiently afforded the desired penta-substituted trifluoromethylarene **3a** in 85% yield (entry 1). Screening other solvents in the presence of DABCO gave inferior results (entries 2-4). Next, we screened a series of bases employing dichloromethane as solvent to improve yield. Many kinds of organic bases could promote the reaction to offer the desired product in 48-80% yields (entries 5-9), which were lower than that using DABCO. Inorganic base is also available for the assembly of penta-substituted CF<sub>3</sub>-benzene **3a**, but low yield was observed (entries 10-13). The influence of different catalyst loading or reaction temperature on the [4+2] aromatization reaction was also investigated, but no better results was obtained. Thus, conducting the reaction in DCM at room temperature with 20 mol% DABCO as catalyst was chosen as the optimal reaction condition, and this optimal condition was used for the substrate scope investigation.

### 3. Optimization of the reaction condition of **4a** and CF<sub>3</sub>-alkene **2a**

**Table S2.** Optimization of the reaction of **4a** and CF<sub>3</sub>-alkene **2a**<sup>a</sup>

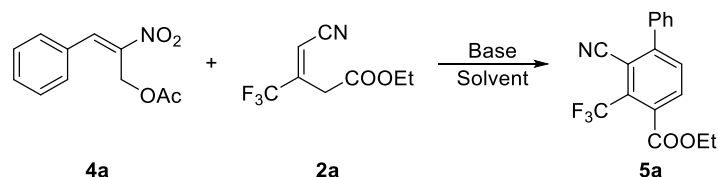

| entry                   | solvent     | base                            | yield (%) <sup>b</sup> |
|-------------------------|-------------|---------------------------------|------------------------|
| 1                       | DCM         | DABCO                           | 21                     |
| 2                       | MeCN        | DABCO                           | 40                     |
| 3                       | Tol         | DABCO                           | 18                     |
| 4                       | EtOH        | DABCO                           | 44                     |
| 5                       | THF         | DABCO                           | 38                     |
| 6                       | DMF         | DABCO                           | 36                     |
| 7                       | EtOH        | TEA                             | 33                     |
| 8                       | EtOH        | DBU                             | 35                     |
| 9                       | EtOH        | PPh <sub>3</sub>                | 38                     |
| 10                      | EtOH        | DMAP                            | 57                     |
| 11                      | EtOH        | K <sub>2</sub> CO <sub>3</sub>  | -                      |
| 12                      | EtOH        | Cs <sub>2</sub> CO <sub>3</sub> | -                      |
| 13                      | EtOH        | NaHCO <sub>3</sub>              | -                      |
| 14                      | EtOH        | K <sub>2</sub> HPO <sub>4</sub> | -                      |
| 15 <sup>c</sup>         | EtOH        | DMAP                            | 70                     |
| 16 <sup>d</sup>         | EtOH        | DMAP                            | 65                     |
| 17 <sup>c,e</sup>       | EtOH        | DMAP                            | 60                     |
| <b>18<sup>c,f</sup></b> | <b>EtOH</b> | <b>DMAP</b>                     | <b>77</b>              |

<sup>a</sup> Unless indicated otherwise, the reaction was performed with 0.2 mmol of **4a**, 0.3 mmol of **2a**, and 0.04 mmol of base in 1 mL solvent at room temperature (monitored by TLC). <sup>b</sup> Yield of isolated **5a**. <sup>c</sup> 0.08 mol DMAP was used. <sup>d</sup> 0.12 mol DMAP was used. <sup>e</sup> The reaction was performed at 0 °C. <sup>f</sup> The reaction was performed at 60 °C.

2-nitroallylic acetate **4a** was carefully selected as the dielectrophilic reaction partner to undergo [3+3] aromatization reaction with CF<sub>3</sub>-alkenes **2a**. Unfortunately, the optimal reaction conditions for the aforementioned [4+2] aromatization did not efficiently delivery our desired aromatized CF<sub>3</sub>-benzene **5a** (Table S2, entry 1). In order to further explore the feasibility of our protocol, various solvents were screened using 20 mol% DABCO as catalyst at room temperature (entries 2-6). Fortunately, acetonitrile, ethanol, tetrahydrofuran and dimethyl formamide were proved to be effective solvents for the [3+3] aromatization reaction, with ethanol showing the higher efficiency (entry 4). The screening of bases revealed that DMAP was the best choice providing target product **5a** in 57% yield (entries 7-14). Remarkably, Inorganic bases led to complex mixtures from which we fail to purify the expected compounds (entries 11-14). Thinking of the elimination of acetic acid during the reaction, we increased the catalyst loading to improve the reaction efficiency, and 40 mol% DMAP was the best

choice (entries 15-16). By screening the reaction temperature, further improvement of the reaction efficiency was achieved (entries 17-18). Thus, conducting the reaction in EtOH at 60 °C with 40 mol% DMAP as catalyst was chosen as the optimal reaction condition, and this optimal condition was used for the substrate scope investigation.

#### 4. General procedure for the preparation of trifluoromethylarenes **3** and **5**

##### 4.1 General procedure for the preparation of trifluoromethylarenes **3**

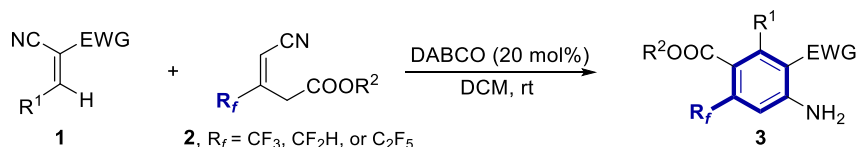

The reaction was carried out with **1** (0.20 mmol) and **2** (0.24 mmol), and DABCO (0.04 mmol) in DCM (1mL) at room temperature. The reaction was monitored by TLC until the reaction was completion. Then the reaction mixture was concentrated and the residue was purified by flash chromatography on silica gel (petroleum ether/ethyl acetate = 10:1) to give the desired penta-substituted trifluoromethylarenes **3**, which was further analyzed by  $^1\text{H}$  NMR,  $^{13}\text{C}$  HMR, HRMS analysis.

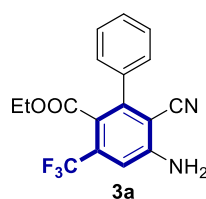

**3a**: Obtained as a white solid; yield: 85% (56.8 mg) after flash chromatography. mp 155-157 °C,  $^1\text{H}$  NMR (400 MHz,  $\text{CDCl}_3$ ):  $\delta$  = 7.45-7.34 (m, 5H), 7.04 (s, 1H), 4.89 (s, 2H), 3.96 (q,  $J$  = 7.2 Hz, 2H), 0.94 (t,  $J$  = 7.2 Hz, 3H) ppm;  $^{13}\text{C}$  NMR (100 MHz,  $\text{CDCl}_3$ ):  $\delta$  = 165.95, 150.20, 145.96, 135.94, 132.37 (q,  $J_{\text{CF}}$  = 32.3 Hz), 129.28, 128.70, 128.49, 122.62 (d,  $J_{\text{CF}}$  = 273.2 Hz), 122.04, 115.151, 111.29 (q,  $J_{\text{CF}}$  = 5.2 Hz), 99.64, 61.83, 13.42 ppm. ESI HRMS: calcd. For  $\text{C}_{17}\text{H}_{13}\text{F}_3\text{N}_2\text{O}_2 + \text{Na}$  357.0827, found 357.0824.

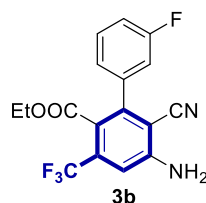

**3b**: Obtained as a white solid; yield: 80% (56.4 mg) after flash chromatography. mp 141-143 °C,  $^1\text{H}$  NMR (400 MHz,  $\text{CDCl}_3$ ):  $\delta$  = 7.45-7.40 (m, 1H), 7.18-7.07 (m, 4H), 4.92 (s, 2H), 4.01 (q,  $J$  = 7.2 Hz, 2H), 1.00 (t,  $J$  = 6.8 Hz, 3H) ppm;  $^{13}\text{C}$  NMR (100 MHz,  $\text{CDCl}_3$ ):  $\delta$  = 165.63, 162.39 (d,  $J_{\text{CF}}$  = 246.7 Hz), 150.22, 144.40 (d,  $J_{\text{CF}}$  = 1.9 Hz), 137.79 (d,  $J_{\text{CF}}$  = 8.0 Hz), 132.54 (q,  $J_{\text{CF}}$  = 32.2 Hz), 130.27 (d,  $J_{\text{CF}}$  = 8.3 Hz), 124.70 (d,  $J_{\text{CF}}$  = 3.1 Hz), 122.52 (d,  $J_{\text{CF}}$  = 273.2 Hz), 122.01 (d,  $J_{\text{CF}}$  = 1.7 Hz), 116.37 (d,  $J_{\text{CF}}$  = 20.8 Hz), 116.12 (d,  $J_{\text{CF}}$  = 22.8 Hz), 114.83, 111.74 (q,  $J_{\text{CF}}$  = 5.0 Hz), 99.40, 61.98, 13.47 ppm. ESI HRMS: calcd. For  $\text{C}_{17}\text{H}_{12}\text{F}_4\text{N}_2\text{O}_2 + \text{Na}$  375.0733, found 375.0732.

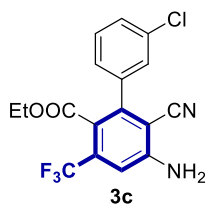

**3c:** Obtained as a white solid; yield: 81% (59.7 mg) after flash chromatography. mp 125-127 °C, <sup>1</sup>H NMR (600 MHz, CDCl<sub>3</sub>): δ = 7.43-7.41 (m, 1H), 7.38 (t, *J* = 7.8 Hz, 1H), 7.34 (t, *J* = 1.8 Hz, 1H), 7.25-7.23 (m, 1H), 7.05 (s, 1H), 4.94 (s, 2H), 4.01 (q, *J* = 7.2 Hz, 2H), 1.00 (t, *J* = 7.2 Hz, 3H) ppm; <sup>13</sup>C NMR (150 MHz, CDCl<sub>3</sub>): δ = 165.73, 150.35, 144.32, 137.57, 134.54, 132.60 (q, *J*<sub>CF</sub> = 32.4 Hz), 129.94, 129.56, 128.93, 127.13, 122.57 (q, *J*<sub>CF</sub> = 273.3 Hz), 121.99, 114.94, 111.84 (q, *J*<sub>CF</sub> = 5.3 Hz), 99.34, 62.12, 13.58 ppm. ESI HRMS: calcd. For C<sub>17</sub>H<sub>12</sub>ClF<sub>3</sub>N<sub>2</sub>O<sub>2</sub>+Na 391.0437, found 391.0429.

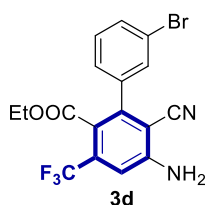

**3d:** Obtained as a white solid; yield: 80% (66.1 mg) after flash chromatography. mp 113-115 °C, <sup>1</sup>H NMR (600 MHz, CDCl<sub>3</sub>): δ = 7.59-7.57 (m, 1H), 7.50 (t, *J* = 1.8 Hz, 1H), 7.34-7.29 (m, 2H), 7.05 (s, 1H), 4.92 (s, 2H), 4.02 (q, *J* = 7.2 Hz, 2H), 1.01 (t, *J* = 7.2 Hz, 3H) ppm; <sup>13</sup>C NMR (150 MHz, CDCl<sub>3</sub>): δ = 165.69, 150.30, 144.21, 137.80, 132.61 (d, *J*<sub>CF</sub> = 32.1 Hz), 132.48, 131.74, 130.16, 127.59, 122.56 (d, *J*<sub>CF</sub> = 273.2 Hz), 122.54, 122.06, 114.92, 111.83 (q, *J*<sub>CF</sub> = 5.3 Hz), 99.39, 62.13, 13.62 ppm. ESI HRMS: calcd. For C<sub>17</sub>H<sub>12</sub>BrF<sub>3</sub>N<sub>2</sub>O<sub>2</sub>+Na 434.9932, found 434.9931.

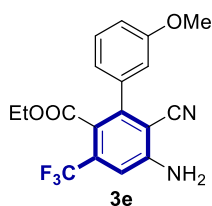

**3e:** Obtained as a white solid; yield: 82% (59.7 mg) after flash chromatography. mp 145-147 °C, <sup>1</sup>H NMR (600 MHz, CDCl<sub>3</sub>): δ = 7.36 (t, *J* = 7.8 Hz, 1H), 7.06 (s, 1H), 7.00-6.89 (m, 3H), 4.92 (s, 2H), 4.03-3.99 (m, 2H), 3.83 (s, 3H), 0.99 (t, *J* = 7.8 Hz, 3H) ppm; <sup>13</sup>C NMR (150 MHz, CDCl<sub>3</sub>): δ = 165.98, 159.40, 150.18, 145.73, 137.06, 132.33 (q, *J*<sub>CF</sub> = 32.4 Hz), 129.64, 122.59 (d, *J*<sub>CF</sub> = 273.3 Hz), 121.90, 121.08, 115.26, 115.15, 114.04, 111.28 (q, *J*<sub>CF</sub> = 5.3 Hz), 99.50, 61.89, 55.35, 13.47 ppm. ESI HRMS: calcd. For C<sub>18</sub>H<sub>15</sub>F<sub>3</sub>N<sub>2</sub>O<sub>3</sub>+Na 387.0932, found 387.0927.

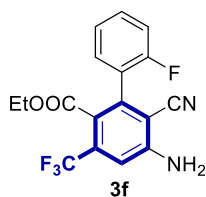

**3f:** Obtained as a white solid; yield: 84% (59.2 mg) after flash chromatography. mp 137-139 °C,  $^1\text{H}$  NMR (600 MHz,  $\text{CDCl}_3$ ):  $\delta$  = 7.48-7.44 (m, 1H), 7.28-7.19 (m, 3H), 7.09 (s, 1H), 4.9 (s, 2H), 4.02-3.97 (m, 2H), 0.976 (t,  $J$  = 6.6 Hz, 3H) ppm;  $^{13}\text{C}$  NMR (150 MHz,  $\text{CDCl}_3$ ):  $\delta$  = 165.51, 159.38 (d,  $J_{\text{CF}}$  = 247.2 Hz), 150.12, 140.10, 132.72 (q,  $J_{\text{CF}}$  = 32.4 Hz), 131.58 (d,  $J_{\text{CF}}$  = 8.3 Hz), 130.69 (d,  $J_{\text{CF}}$  = 2.7 Hz), 124.21 (d,  $J_{\text{CF}}$  = 4.1 Hz), 123.59 (d,  $J_{\text{CF}}$  = 16.4 Hz), 122.51 (q,  $J_{\text{CF}}$  = 273.0 Hz), 122.40, 115.94 (d,  $J_{\text{CF}}$  = 21.3 Hz), 114.73, 112.22 (q,  $J_{\text{CF}}$  = 5.3 Hz), 100.21, 61.90, 13.42 ppm. ESI HRMS: calcd. For  $\text{C}_{17}\text{H}_{12}\text{F}_4\text{N}_2\text{O}_2 + \text{Na}$  375.0733, found 375.0732.

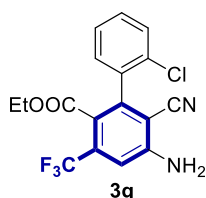

**3g:** Obtained as a white solid; yield: 78% (57.5 mg) after flash chromatography. mp 130-132 °C,  $^1\text{H}$  NMR (400 MHz,  $\text{CDCl}_3$ ):  $\delta$  = 7.51-7.49 (m, 1H), 7.42-7.24 (m, 3H), 7.09 (s, 1H), 4.91 (s, 2H), 3.97 (q,  $J$  = 7.2 Hz, 2H), 0.95 (t,  $J$  = 7.2 Hz, 3H) ppm;  $^{13}\text{C}$  NMR (100 MHz,  $\text{CDCl}_3$ ):  $\delta$  = 165.29, 150.05, 143.39, 134.82, 133.45, 132.74 (d,  $J_{\text{CF}}$  = 32.5 Hz), 130.72, 130.54, 129.75, 126.74, 122.55 (d,  $J_{\text{CF}}$  = 273.0 Hz), 122.05 (d,  $J_{\text{CF}}$  = 1.8 Hz), 114.55, 112.22 (q,  $J_{\text{CF}}$  = 5.1 Hz), 100.17, 61.81, 13.38 ppm. ESI HRMS: calcd. For  $\text{C}_{17}\text{H}_{12}\text{ClF}_3\text{N}_2\text{O}_2 + \text{Na}$  391.0437, found 391.0437.

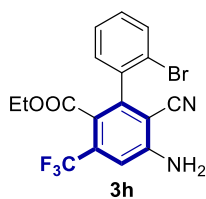

**3h:** Obtained as a white solid; yield: 86% (71.1 mg) after flash chromatography. mp 115-117 °C,  $^1\text{H}$  NMR (400 MHz,  $\text{CDCl}_3$ ):  $\delta$  = 7.69 (dd,  $J_1$  = 7.6 Hz,  $J_2$  = 0.4 Hz, 1H), 7.40-7.24 (m, 3H), 7.09 (s, 1H), 4.92 (s, 2H), 3.97 (q,  $J$  = 7.2 Hz, 2H), 0.96 (t,  $J$  = 7.2 Hz, 3H) ppm;  $^{13}\text{C}$  NMR (100 MHz,  $\text{CDCl}_3$ ):  $\delta$  = 165.23, 150.03, 144.86, 136.84, 132.91, 132.40 (d,  $J_{\text{CF}}$  = 32.5 Hz), 130.78, 130.52, 127.30, 123.23, 122.55 (d,  $J_{\text{CF}}$  = 273.1 Hz), 121.86 (d,  $J_{\text{CF}}$  = 1.9 Hz), 114.53, 112.22 (q,  $J_{\text{CF}}$  = 5.2 Hz), 100.16, 61.80, 13.39 ppm. ESI HRMS: calcd. For  $\text{C}_{17}\text{H}_{12}\text{BrF}_3\text{N}_2\text{O}_2 + \text{Na}$  434.9932, found 434.9930.

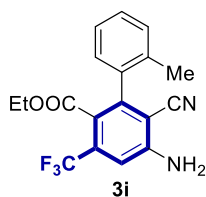

**3i:** Obtained as a white solid; yield: 81% (56.4 mg) after flash chromatography. mp 127-129 °C,  $^1\text{H}$  NMR (400 MHz,  $\text{CDCl}_3$ ):  $\delta$  = 7.35-7.28 (m, 2H), 7.24-7.20 (m, 1H), 7.11-7.09 (m, 1H), 7.05 (s, 1H), 4.85 (s, 2H), 3.92 (q,  $J$  = 7.2 Hz, 2H), 2.17 (s, 3H), 0.90 (s,  $J$  = 7.2 Hz, 3H) ppm;  $^{13}\text{C}$  NMR (100 MHz,  $\text{CDCl}_3$ ):  $\delta$  = 165.60, 149.88, 145.95, 136.34, 135.29, 132.43 (d,  $J_{\text{CF}}$  = 32.4 Hz), 130.19, 129.37, 128.83, 125.67, 122.63 (d,  $J_{\text{CF}}$  = 273.0 Hz), 122.21 (d,  $J_{\text{CF}}$  = 1.8 Hz), 114.75, 111.38 (q,  $J_{\text{CF}}$  = 5.1 Hz), 100.09, 61.67, 19.61, 13.34 ppm. ESI HRMS: calcd. For  $\text{C}_{18}\text{H}_{15}\text{F}_3\text{N}_2\text{O}_2 + \text{Na}$  371.0983, found 371.0980.

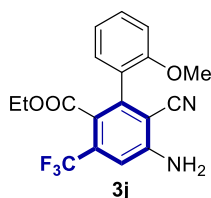

**3j:** Obtained as a white solid; yield: 87% (63.4 mg) after flash chromatography. mp 127-129 °C,  $^1\text{H}$  NMR (600 MHz,  $\text{CDCl}_3$ ):  $\delta$  = 7.41-7.38 (m, 1H), 7.12 (dd,  $J_1$  = 7.2 Hz,  $J_2$  = 1.8 Hz, 1H), 7.01 (s, 1H), 7.00-6.97 (m, 2H), 4.84 (s, 2H), 3.95 (q,  $J$  = 7.2 Hz, 2H), 3.81 (s, 3H), 0.93 (t,  $J$  = 7.2 Hz, 3H) ppm;  $^{13}\text{C}$  NMR (150 MHz,  $\text{CDCl}_3$ ):  $\delta$  = 165.98, 156.64, 150.02, 143.31, 132.58 (q,  $J_{\text{CF}}$  = 32.3 Hz), 132.56, 131.06, 130.22, 124.93, 122.76 (d,  $J_{\text{CF}}$  = 273.2 Hz), 122.33, 120.63, 111.57 (q,  $J_{\text{CF}}$  = 5.3 Hz), 111.30, 100.85, 61.71, 55.81, 13.52 ppm. ESI HRMS: calcd. For  $\text{C}_{18}\text{H}_{15}\text{F}_3\text{N}_2\text{O}_3 + \text{Na}$  387.0932, found 387.0930.

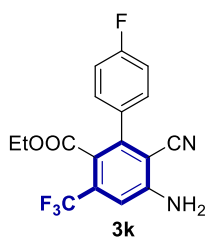

**3k:** Obtained as a white solid; yield: 87% (61.3 mg) after flash chromatography. mp 121-123 °C,  $^1\text{H}$  NMR (600 MHz,  $\text{CDCl}_3$ ):  $\delta$  = 7.36-7.33 (m, 2H), 7.17-7.13 (m, 2H), 7.05 (s, 1H), 4.92 (s, 2H), 4.00 (q,  $J$  = 7.2 Hz, 2H), 1.00 (t,  $J$  = 7.2 Hz, 3H) ppm;  $^{13}\text{C}$  NMR (150 MHz,  $\text{CDCl}_3$ ):  $\delta$  = 165.84, 163.27 (d,  $J_{\text{CF}}$  = 248.1 Hz), 150.21, 144.83, 132.44 (q,  $J_{\text{CF}}$  = 32.4 Hz), 131.84 (d,  $J_{\text{CF}}$  = 3.6 Hz), 130.74 (d,  $J_{\text{CF}}$  = 8.6 Hz), 122.55 (d,  $J_{\text{CF}}$  = 273.2 Hz), 122.16 (d,  $J_{\text{CF}}$  = 2.1 Hz), 115.69 (d,  $J_{\text{CF}}$  = 21.8 Hz), 115.04, 111.50 (q,  $J_{\text{CF}}$  = 5.3 Hz), 99.65, 61.95, 13.52 ppm. ESI HRMS: calcd. For  $\text{C}_{17}\text{H}_{12}\text{F}_4\text{N}_2\text{O}_2 + \text{Na}$  375.0733, found 375.0728.



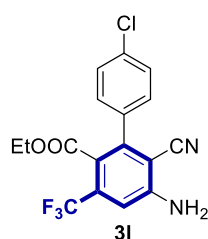

**3l:** Obtained as a white solid; yield: 78% (57.5 mg) after flash chromatography. mp 175-177 °C,  $^1\text{H}$  NMR (400 MHz,  $\text{CDCl}_3$ ):  $\delta$  = 7.43 (d,  $J$  = 8.8 Hz, 2H), 7.30 (d,  $J$  = 8.4 Hz, 2H), 7.06 (s, 1H), 4.90 (s, 2H), 4.01 (q,  $J$  = 7.2 Hz, 2H), 1.01 (t,  $J$  = 7.2 Hz, 3H) ppm;  $^{13}\text{C}$  NMR (100 MHz,  $\text{CDCl}_3$ ):  $\delta$  = 165.69, 150.20, 144.64, 135.64, 134.28, 132.53 (d,  $J_{\text{CF}}$  = 32.1 Hz), 130.15, 128.83, 122.52 (d,  $J_{\text{CF}}$  = 273.3 Hz), 122.07 (d,  $J_{\text{CF}}$  = 2.0 Hz), 144.93, 111.61 (q,  $J_{\text{CF}}$  = 5.2 Hz), 99.49, 61.99, 13.50 ppm. ESI HRMS: calcd. For  $\text{C}_{17}\text{H}_{12}\text{ClF}_3\text{N}_2\text{O}_2 + \text{Na}$  391.0437, found 391.0437.

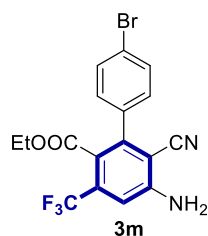

**3m:** Obtained as a white solid; yield: 86% (71.1 mg) after flash chromatography. mp 187-189 °C,  $^1\text{H}$  NMR (600 MHz,  $\text{CDCl}_3$ ):  $\delta$  = 7.58 (d,  $J$  = 8.4 Hz, 2H), 7.22 (d,  $J$  = 8.4 Hz, 2H), 7.05 (s, 1H), 4.92 (s, 2H), 4.00 (q,  $J$  = 7.2 Hz, 2H), 1.00 (t,  $J$  = 7.2 Hz, 3H) ppm;  $^{13}\text{C}$  NMR (150 MHz,  $\text{CDCl}_3$ ):  $\delta$  = 165.80, 150.33, 144.71, 134.84, 132.61 (q,  $J_{\text{CF}}$  = 32.6 Hz), 131.86, 130.44, 123.94, 122.58 (d,  $J_{\text{CF}}$  = 273.5 Hz), 121.97, 115.05, 111.71 (q,  $J_{\text{CF}}$  = 5.4 Hz), 99.36, 62.11, 13.58 ppm. ESI HRMS: calcd. For  $\text{C}_{17}\text{H}_{12}\text{BrF}_3\text{N}_2\text{O}_2 + \text{Na}$  434.9932, found 434.9938.

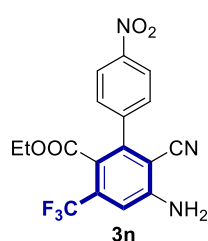

**3n:** Obtained as a white solid; yield: 83% (63.0 mg) after flash chromatography. mp 195-197 °C,  $^1\text{H}$  NMR (600 MHz,  $\text{CDCl}_3$ ):  $\delta$  = 8.33-8.30 (m, 2H), 7.56-7.54 (m, 2H), 7.12 (s, 1H), 5.02 (s, 2H), 3.99 (q,  $J$  = 7.2 Hz, 2H), 1.00 (t,  $J$  = 6.6 Hz, 3H) ppm;  $^{13}\text{C}$  NMR (150 MHz,  $\text{CDCl}_3$ ):  $\delta$  = 165.42, 150.52, 148.39, 143.58, 142.47, 132.95 (q,  $J_{\text{CF}}$  = 32.6 Hz), 130.15, 123.81, 122.46 (q,  $J_{\text{CF}}$  = 273.3 Hz), 121.69, 114.68, 112.51 (q,  $J_{\text{CF}}$  = 5.3 Hz), 98.82, 62.30, 13.61 ppm. ESI HRMS: calcd. For  $\text{C}_{17}\text{H}_{12}\text{F}_3\text{N}_3\text{O}_4 + \text{Na}$  402.0678, found 402.0670.

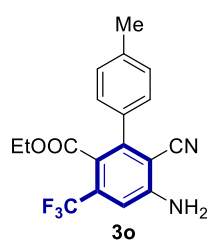

**3o:** Obtained as a white solid; yield: 84% (58.5 mg) after flash chromatography. mp 129-131 °C,  $^1\text{H}$  NMR (400 MHz,  $\text{CDCl}_3$ ):  $\delta$  = 7.24 (s, 4H), 7.02 (s, 1H), 4.85 (s, 2H), 3.99 (q,  $J$  = 7.2 Hz, 2H), 2.39 (s, 3H), 0.98 (t,  $J$  = 7.2 Hz, 3H) ppm;  $^{13}\text{C}$  NMR (100 MHz,  $\text{CDCl}_3$ ):  $\delta$  = 166.01, 150.10, 146.13, 139.25, 132.97, 132.31 (d,  $J_{\text{CF}}$  = 32.2 Hz), 129.18, 128.56, 122.64 (d,  $J_{\text{CF}}$  = 273.1 Hz), 122.17 (d,  $J_{\text{CF}}$  = 1.5 Hz), 115.27, 111.05 (q,  $J_{\text{CF}}$  = 5.1 Hz), 99.85, 61.79, 21.34, 13.46 ppm. ESI HRMS: calcd. For  $\text{C}_{18}\text{H}_{15}\text{F}_3\text{N}_2\text{O}_2 + \text{Na}$  371.0983, found 371.0983.

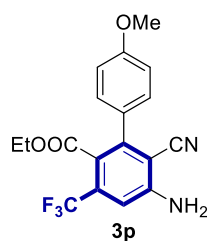

**3p:** Obtained as a white solid; yield: 75% (54.6 mg) after flash chromatography. mp 139-141 °C,  $^1\text{H}$  NMR (600 MHz,  $\text{CDCl}_3$ ):  $\delta$  = 7.29-7.26 (m, 2H), 7.00 (s, 1H), 6.96-6.93 (m, 2H), 4.88 (s, 2H), 4.00 (q,  $J$  = 7.2 Hz, 2H), 3.83 (s, 3H), 0.99 (t,  $J$  = 7.2 Hz, 3H) ppm;  $^{13}\text{C}$  NMR (150 MHz,  $\text{CDCl}_3$ ):  $\delta$  = 166.26, 160.38, 150.27, 145.82, 132.31 (q,  $J_{\text{CF}}$  = 32.3 Hz), 130.14, 128.17, 122.71 (d,  $J_{\text{CF}}$  = 273.2 Hz), 122.22, 115.47, 114.01, 111.05 (q,  $J_{\text{CF}}$  = 5.3 Hz), 99.90, 61.93, 55.39, 13.65 ppm. ESI HRMS: calcd. For  $\text{C}_{18}\text{H}_{15}\text{F}_3\text{N}_2\text{O}_3 + \text{Na}$  387.0932, found 387.0924.

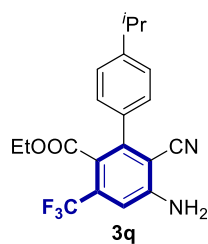

**3q:** Obtained as a white solid; yield: 84% (63.2 mg) after flash chromatography. mp 183-185 °C,  $^1\text{H}$  NMR (400 MHz,  $\text{CDCl}_3$ ):  $\delta$  = 7.30-7.28 (m, 4H), 7.03 (s, 1H), 4.86 (s, 2H), 3.96 (q,  $J$  = 6.8 Hz, 2H), 2.95 (m, 1H), 1.27 (d,  $J$  = 7.2 Hz, 6H), 0.88 (t,  $J$  = 7.2 Hz, 3H) ppm;  $^{13}\text{C}$  NMR (100 MHz,  $\text{CDCl}_3$ ):  $\delta$  = 166.04, 150.15, 150.09, 146.12, 133.29, 132.32 (d,  $J_{\text{CF}}$  = 32.2 Hz), 128.66, 126.54, 122.63 (d,  $J_{\text{CF}}$  = 273.2 Hz), 122.23 (d,  $J_{\text{CF}}$  = 1.9 Hz), 115.28, 111.02 (q,  $J_{\text{CF}}$  = 5.1 Hz), 99.73, 61.72, 33.95, 23.86, 13.33 ppm. ESI HRMS: calcd. For  $\text{C}_{20}\text{H}_{19}\text{F}_3\text{N}_2\text{O}_2 + \text{Na}$  399.1296, found 399.1285.

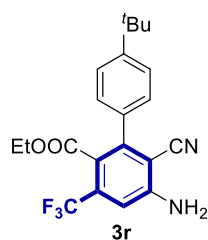

**3r:** Obtained as a white solid; yield: 81% (63.2 mg) after flash chromatography. mp 203-205 °C,  $^1\text{H}$  NMR (600 MHz,  $\text{CDCl}_3$ ):  $\delta$  = 7.46-7.44 (m, 2H), 7.29-7.26 (m, 2H), 7.03 (s, 1H), 4.89 (s, 2H), 3.95 (q,  $J$  = 7.2 Hz, 2H), 1.34 (s, 9H), 0.85 (t,  $J$  = 7.2 Hz, 3H) ppm;  $^{13}\text{C}$  NMR (150 MHz,  $\text{CDCl}_3$ ):  $\delta$  = 166.10, 152.34, 150.19, 146.06, 132.92, 132.31 (q,  $J_{\text{CF}}$  = 32.3 Hz), 128.37, 125.39, 122.61 (d,  $J_{\text{CF}}$  = 273.3 Hz), 122.15, 115.33, 111.02 (q,  $J_{\text{CF}}$  = 5.4 Hz), 99.58, 61.73, 34.74, 31.25, 13.28 ppm. ESI HRMS: calcd. For  $\text{C}_{21}\text{H}_{21}\text{F}_3\text{N}_2\text{O}_2 + \text{Na}$  413.1453, found 413.1453.

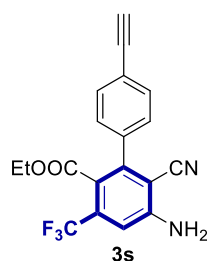

**3s:** Obtained as a white solid; yield: 85% (60.9 mg) after flash chromatography. mp 131-133 °C,  $^1\text{H}$  NMR (600 MHz,  $\text{CDCl}_3$ ):  $\delta$  = 7.58-7.56 (m, 2H), 7.34-7.32 (m, 2H), 7.06 (s, 1H), 4.93 (s, 2H), 3.99 (q,  $J$  = 7.2 Hz, 2H), 3.16 (s, 1H), 0.99 (t,  $J$  = 7.2 Hz, 3H) ppm;  $^{13}\text{C}$  NMR (150 MHz,  $\text{CDCl}_3$ ):  $\delta$  = 165.74, 150.27, 145.05, 136.29, 132.52 (d,  $J_{\text{CF}}$  = 32.1 Hz), 132.22, 128.79, 123.32, 122.53 (d,  $J_{\text{CF}}$  = 273.3 Hz), 121.89 (d,  $J_{\text{CF}}$  = 2.1 Hz), 114.96, 111.61 (q,  $J_{\text{CF}}$  = 5.3 Hz), 99.29, 82.87, 78.70, 61.99, 13.48 ppm. ESI HRMS: calcd. For  $\text{C}_{19}\text{H}_{13}\text{F}_3\text{N}_2\text{O}_2 + \text{Na}$  381.0827, found 381.0830.

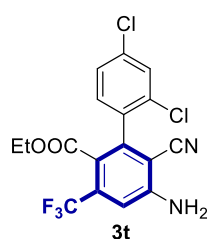

**3t:** Obtained as a white solid; yield: 78% (62.9 mg) after flash chromatography. mp 161-162 °C,  $^1\text{H}$  NMR (400 MHz,  $\text{CDCl}_3$ ):  $\delta$  = 7.53 (d,  $J$  = 2.0 Hz, 1H), 7.33 (dd,  $J_1$  = 8.4 Hz,  $J_2$  = 2.0 Hz, 1H), 7.20 (d,  $J$  = 8.0 Hz, 1H), 7.10 (s, 1H), 4.93 (s, 2H), 4.01 (q,  $J$  = 7.2 Hz, 2H), 1.03 (t,  $J$  = 7.2 Hz, 3H) ppm;  $^{13}\text{C}$  NMR (100 MHz,  $\text{CDCl}_3$ ):  $\delta$  = 165.08, 150.09, 142.31, 136.21, 136.21, 134.38, 133.33, 132.91 (d,  $J_{\text{CF}}$  = 32.6 Hz), 131.34, 129.73, 127.20, 122.46 (d,  $J_{\text{CF}}$  = 273.1 Hz), 122.06 (d,  $J_{\text{CF}}$  = 1.8 Hz), 114.36, 112.52 (q,  $J_{\text{CF}}$  = 5.1 Hz), 100.01, 61.98, 13.47 ppm. ESI HRMS: calcd. For  $\text{C}_{17}\text{H}_{11}\text{Cl}_2\text{F}_3\text{N}_2\text{O}_2 + \text{Na}$  425.0047, found 425.0048.

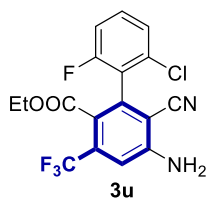

**3u:** Obtained as a white solid; yield: 78% (60.3 mg) after flash chromatography. mp 108-110 °C,  $^1\text{H}$  NMR (600 MHz,  $\text{CDCl}_3$ ):  $\delta$  = 7.56-7.54 (m, 1H), 7.40 (dd,  $J_1$  = 6.0 Hz,  $J_2$  = 2.4 Hz, 1H), 7.10-7.07 (m, 2H), 4.94 (s, 2H), 4.08-4.04 (m, 2H), 1.05 (t,  $J$  = 7.2 Hz, 3H) ppm;  $^{13}\text{C}$  NMR (150 MHz,  $\text{CDCl}_3$ ):  $\delta$  = 165.24, 159.46, 157.81, 150.23, 138.54, 134.53, 134.47, 133.39, 133.38, 133.00 (q,  $J_{\text{CF}}$  = 32.4 Hz), 125.63, 125.51, 122.48 (q,  $J_{\text{CF}}$  = 273.3 Hz), 122.44, 117.92, 117.77, 116.69, 116.66, 114.53, 112.73 (q,  $J_{\text{CF}}$  = 5.3 Hz), 100.01, 62.21, 13.63 ppm. ESI HRMS: calcd. For  $\text{C}_{17}\text{H}_{11}\text{ClF}_4\text{N}_2\text{O}_2 + \text{Na}$  409.0343, found 409.0346.

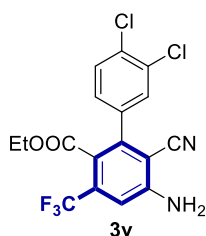

**3v:** Obtained as a white solid; yield: 82% (66.1 mg) after flash chromatography. mp 158-160 °C,  $^1\text{H}$  NMR (600 MHz,  $\text{CDCl}_3$ ):  $\delta$  = 7.53 (d,  $J$  = 8.4 Hz, 1H), 7.54 (d,  $J$  = 2.4 Hz, 1H), 7.21 (dd,  $J_1$  = 7.8 Hz,  $J_2$  = 1.8 Hz, 1H), 7.07 (s, 1H), 4.94 (s, 2H), 4.05 (q,  $J$  = 7.2 Hz, 2H), 1.06 (t,  $J$  = 7.2 Hz, 3H) ppm;  $^{13}\text{C}$  NMR (150 MHz,  $\text{CDCl}_3$ ):  $\delta$  = 165.57, 150.37, 143.26, 135.66, 134.02, 132.98, 132.73 (d,  $J_{\text{CF}}$  = 32.4 Hz), 130.78, 130.73, 128.28, 122.50 (d,  $J_{\text{CF}}$  = 273.3 Hz), 121.97, 114.82, 112.09 (q,  $J_{\text{CF}}$  = 5.3 Hz), 99.21, 62.26, 13.66 ppm. ESI HRMS: calcd. For  $\text{C}_{17}\text{H}_{11}\text{Cl}_2\text{F}_3\text{N}_2\text{O}_2 + \text{Na}$  425.0047, found 425.0036.

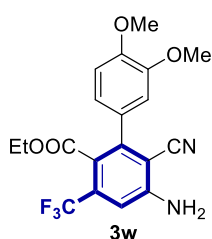

**3w:** Obtained as a white solid; yield: 79% (62.3 mg) after flash chromatography. mp 159-161 °C,  $^1\text{H}$  NMR (600 MHz,  $\text{CDCl}_3$ ):  $\delta$  = 7.01 (s, 1H), 6.94-6.92 (m, 2H), 6.86 (d,  $J$  = 1.8 Hz, 1H), 4.89 (s, 2H), 4.00 (q,  $J$  = 7.2 Hz, 2H), 3.91 (s, 3H), 3.87 (s, 3H), 1.00 (t,  $J$  = 7.2 Hz, 3H) ppm;  $^{13}\text{C}$  NMR (150 MHz,  $\text{CDCl}_3$ ):  $\delta$  = 166.31, 150.28, 149.82, 148.77, 145.74, 132.33 (q,  $J_{\text{CF}}$  = 32.1 Hz), 128.31, 122.69 (d,  $J_{\text{CF}}$  = 273.2 Hz), 122.18, 121.63, 115.46, 111.96, 111.07 (q,  $J_{\text{CF}}$  = 5.3 Hz), 110.98, 99.82, 62.00, 56.06, 55.98, 13.69 ppm. ESI HRMS: calcd. For  $\text{C}_{19}\text{H}_{17}\text{F}_3\text{N}_2\text{O}_4 + \text{Na}$  417.1038, found 417.1037.

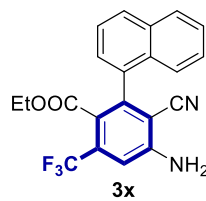

**3x:** Obtained as a white solid; yield: 71% (54.6 mg) after flash chromatography. mp 185-187 °C, <sup>1</sup>H NMR (400 MHz, CDCl<sub>3</sub>): δ = 7.94-7.88 (m, 2H), 7.53-7.45 (m, 4H), 7.38 (dd, *J*<sub>1</sub> = 7.2 Hz, *J*<sub>2</sub> = 1.2 Hz, 1H), 7.12 (s, 1H), 4.88 (s, 2H), 3.69 (q, *J* = 7.2 Hz, 2H), 0.53 (t, *J* = 7.2 Hz, 3H) ppm; <sup>13</sup>C NMR (100 MHz, CDCl<sub>3</sub>): δ = 165.54, 150.04, 144.79, 133.38, 133.27, 132.54 (d, *J*<sub>CF</sub> = 32.2 Hz), 131.43, 129.73, 128.34, 127.26, 126.76, 126.31, 125.32, 124.92, 123.02 (d, *J*<sub>CF</sub> = 1.8 Hz), 114.76, 122.66 (d, *J*<sub>CF</sub> = 273.0 Hz), 111.79 (q, *J*<sub>CF</sub> = 5.1 Hz), 100.88, 61.49, 12.95 ppm. ESI HRMS: calcd. For C<sub>21</sub>H<sub>15</sub>F<sub>3</sub>N<sub>2</sub>O<sub>2</sub>+Na 407.0983, found 407.0984.

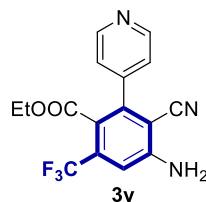

**3y:** Obtained as a white solid; yield: 74% (49.6 mg) after flash chromatography. mp 256-258 °C, <sup>1</sup>H NMR (600 MHz, (CD<sub>3</sub>)<sub>2</sub>SO): δ = 8.69 (dd, *J*<sub>1</sub> = 4.2 Hz, *J*<sub>2</sub> = 1.2 Hz, 2H), 7.38 (dd, *J*<sub>1</sub> = 4.2 Hz, *J*<sub>2</sub> = 1.2 Hz, 2H), 7.14 (s, 2H), 3.87 (q, *J* = 7.2 Hz, 2H), 0.83 (t, *J* = 7.2 Hz, 3H) ppm; <sup>13</sup>C NMR (150 MHz, (CD<sub>3</sub>)<sub>2</sub>SO): δ = 165.12, 152.75, 149.74, 144.20, 143.20, 130.67 (q, *J*<sub>CF</sub> = 31.5 Hz), 123.57, 122.75 (d, *J*<sub>CF</sub> = 273.0 Hz), 120.02, 119.60, 112.59 (d, *J*<sub>CF</sub> = 6.0 Hz), 96.10, 61.42, 13.10 ppm. ESI HRMS: calcd. For C<sub>16</sub>H<sub>12</sub>F<sub>3</sub>N<sub>3</sub>O<sub>2</sub>+Na 358.0779, found 358.0772.

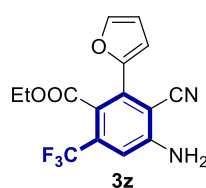

**3z:** Obtained as a white solid; yield: 72% (46.7 mg) after flash chromatography. mp 124-126 °C, <sup>1</sup>H NMR (600 MHz, CDCl<sub>3</sub>): δ = 7.56 (d, *J* = 1.2 Hz, 1H), 7.02 (s, 1H), 6.93 (d, *J* = 3.0 Hz, 1H), 6.56 (dd, *J*<sub>1</sub> = 3.6 Hz, *J*<sub>2</sub> = 1.8 Hz, 1H), 4.97 (s, 2H), 4.24 (q, *J* = 7.2 Hz, 2H), 1.22 (t, *J* = 7.2 Hz, 3H) ppm; <sup>13</sup>C NMR (150 MHz, CDCl<sub>3</sub>): δ = 166.17, 150.72, 147.37, 144.12, 133.88, 132.90 (q, *J*<sub>CF</sub> = 32.3 Hz), 122.46 (q, *J*<sub>CF</sub> = 273.3 Hz), 120.64, 115.43, 112.81, 112.00, 111.63 (q, *J*<sub>CF</sub> = 5.4 Hz), 96.78, 62.21, 13.80 ppm. ESI HRMS: calcd. For C<sub>15</sub>H<sub>11</sub>F<sub>3</sub>N<sub>2</sub>O<sub>3</sub>+Na 347.0619, found 347.0615.

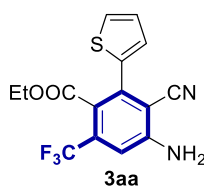

**3aa:** Obtained as a white solid; yield: 71% (48.3 mg) after flash chromatography. mp 142-144 °C, <sup>1</sup>H NMR (400 MHz, CDCl<sub>3</sub>): δ = 7.48 (dd, *J*<sub>1</sub> = 4.8 Hz, *J*<sub>2</sub> = 1.2 Hz, 1H), 7.18 (dd, *J*<sub>1</sub> = 3.2 Hz, *J*<sub>2</sub> = 0.8 Hz, 1H), 7.12-7.10 (m, 1H), 7.05 (s, 1H), 4.91 (s, 2H), 4.08 (q, *J* = 6.8 Hz, 2H), 1.08 (t, *J* = 7.2 Hz, 3H) ppm; <sup>13</sup>C NMR (100 MHz, CDCl<sub>3</sub>): δ = 165.74, 150.24, 138.54, 135.14, 132.32 (d, *J*<sub>CF</sub> = 32.5 Hz), 129.56, 128.21, 127.27, 122.49 (d, *J*<sub>CF</sub> = 273.2 Hz), 123.14 (d, *J*<sub>CF</sub> = 1.5 Hz), 114.96, 111.98 (q, *J*<sub>CF</sub> = 5.1 Hz), 100.45, 62.07, 13.55 ppm. ESI HRMS: calcd. For C<sub>15</sub>H<sub>11</sub>F<sub>3</sub>N<sub>2</sub>O<sub>2</sub>S+Na 363.0391, found 363.0391.

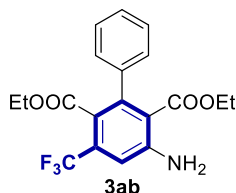

**3ab:** Obtained as a white solid; yield: 78% (59.5 mg) after flash chromatography. mp 128-130 °C, <sup>1</sup>H NMR (600 MHz, CDCl<sub>3</sub>): δ = 7.33-7.32 (m, 3H), 7.23-7.21 (m, 2H), 6.99 (s, 1H), 5.23 (s, 2H), 3.91 (q, *J* = 7.2 Hz, 2H), 3.84 (q, *J* = 7.2 Hz, 2H), 0.93 (t, *J* = 7.2 Hz, 3H), 0.68 (t, *J* = 7.2 Hz, 3H) ppm; <sup>13</sup>C NMR (150 MHz, CDCl<sub>3</sub>): δ = 167.83, 166.88, 147.85, 142.76, 139.05, 130.12 (q, *J*<sub>CF</sub> = 31.8 Hz), 128.60, 127.70, 127.64, 123.0 (q, *J*<sub>CF</sub> = 272.1 Hz), 122.09, 117.64, 112.80 (q, *J*<sub>CF</sub> = 4.5 Hz), 61.42, 61.01, 13.46, 13.08 ppm. ESI HRMS: calcd. For C<sub>19</sub>H<sub>18</sub>F<sub>3</sub>NO<sub>4</sub>+Na 404.1086, found 404.1088.

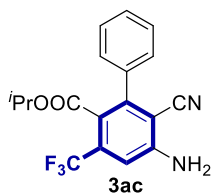

**3ac:** Obtained as a white solid; yield: 78% (54.3 mg) after flash chromatography. mp 130-132 °C, <sup>1</sup>H NMR (600 MHz, CDCl<sub>3</sub>): δ = 7.51-7.46 (m, 3H), 7.35-7.33 (m, 2H), 7.26 (s, 1H), 5.63 (s, 2H), 4.85-4.79 (m, 1H), 0.94 (d, *J* = 6.6 Hz, 6H) ppm; <sup>13</sup>C NMR (150 MHz, CDCl<sub>3</sub>): δ = 163.83, 152.07, 149.66, 134.37, 133.22 (d, *J*<sub>CF</sub> = 32.3 Hz), 130.14, 128.70, 128.51, 124.35, 121.48 (d, *J*<sub>CF</sub> = 275.4 Hz), 113.64, 112.74, 101.85, 93.41, 70.58, 20.93 ppm. ESI HRMS: calcd. For C<sub>18</sub>H<sub>15</sub>F<sub>3</sub>N<sub>2</sub>O<sub>2</sub>+Na 371.0983, found 371.0980.

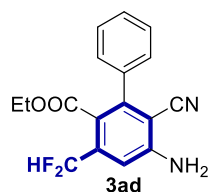

**3ad**: Obtained as a white solid; yield: 76% (48.1 mg) after flash chromatography. mp 132-134 °C, <sup>1</sup>H NMR (600 MHz, CDCl<sub>3</sub>): δ = 7.45-7.43 (m, 3H), 7.33-7.31 (m, 2H), 7.05 (s, 1H), 7.01 (t, *J*<sub>CF</sub> = 55.8 Hz, 1H), 4.90 (s, 2H), 3.91 (q, *J* = 7.2 Hz, 2H), 0.81 (t, *J* = 6.6 Hz, 3H) ppm; <sup>13</sup>C NMR (150 MHz, CDCl<sub>3</sub>): δ = 166.58, 150.90, 146.50, 138.00 (t, *J*<sub>CF</sub> = 21.6 Hz), 137.15, 128.92, 128.47, 128.44, 121.50 (t, *J*<sub>CF</sub> = 3.5 Hz), 115.57, 111.66 (t, *J*<sub>CF</sub> = 239.7 Hz), 110.45 (t, *J*<sub>CF</sub> = 8.0 Hz), 98.56, 61.53, 13.28 ppm. ESI HRMS: calcd. For C<sub>17</sub>H<sub>14</sub>F<sub>2</sub>N<sub>2</sub>O<sub>2</sub>+Na 339.0921, found 339.0920

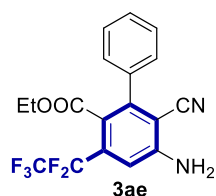

**3ae**: Obtained as a white solid; yield: 88% (67.6 mg) after flash chromatography. mp 129-131 °C, <sup>1</sup>H NMR (700 MHz, CDCl<sub>3</sub>): δ = 7.44-7.43 (m, 3H), 7.36-7.35 (m, 2H), 6.93 (s, 1H), 4.85 (s, 1H), 3.92 (q, *J* = 7.0 Hz, 2H), 0.93 (t, *J* = 7.0 Hz, 3H) ppm; <sup>13</sup>C NMR (175 MHz, CDCl<sub>3</sub>): δ = 165.86, 149.66, 145.70, 135.58, 130.34 (t, *J*<sub>CF</sub> = 23.3 Hz), 129.32, 128.92, 128.40, 123.41 (t, *J*<sub>CF</sub> = 2.5 Hz), 118.61 (dt, *J*<sub>CF1</sub> = 285.4 Hz, *J*<sub>CF2</sub> = 37.8 Hz), 115.04, 113.0 (tq, *J*<sub>CF1</sub> = 255.2 Hz, *J*<sub>CF2</sub> = 38.9 Hz), 112.84 (t, *J*<sub>CF</sub> = 8.2 Hz), 100.34, 61.73, 13.37 ppm. ESI HRMS: calcd. For C<sub>18</sub>H<sub>13</sub>F<sub>5</sub>N<sub>2</sub>O<sub>2</sub>+Na 407.0795, found 407.0793.

## 4.2 General procedure for the preparation of trifluoromethylarenes **5**

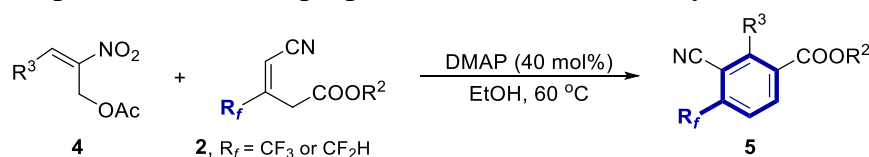

The reaction was carried out with **4** (0.20 mmol) and **2** (0.30 mmol), and DMAP (0.08 mmol) in EtOH (1 mL) at 60 °C. The reaction was monitored by TLC until the reaction was completion. Then the reaction mixture was concentrated and the residue was purified by flash chromatography on silica gel (petroleum ether/ethyl acetate = 40:1) to give the final tetra-substituted trifluoromethylated benzenes **5**, which was further analyzed by  $^1\text{H}$  NMR,  $^{13}\text{C}$  HMR, HRMS analysis.

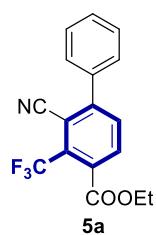

**5a:** Obtained as a white solid; yield: 76% (48.5 mg) after flash chromatography. mp 68-70 °C,  $^1\text{H}$  NMR (400 MHz,  $\text{CDCl}_3$ ):  $\delta$  = 7.80 (d,  $J$  = 8.0 Hz, 1H), 7.72 (d,  $J$  = 8.4 Hz, 1H), 7.52 (s, 5H), 4.43 (q,  $J$  = 7.2 Hz, 2H), 1.40 (t,  $J$  = 7.2 Hz, 3H) ppm;  $^{13}\text{C}$  NMR (100 MHz,  $\text{CDCl}_3$ ):  $\delta$  = 166.42, 149.75, 136.56, 132.95 (d,  $J_{\text{CF}}$  = 2.5 Hz), 132.18, 131.15 (d,  $J_{\text{CF}}$  = 32.3 Hz), 129.73, 128.95, 128.93, 122.09 (d,  $J_{\text{CF}}$  = 274.3 Hz), 114.45, 110.23, 62.91, 13.88 ppm. ESI HRMS: calcd. For  $\text{C}_{17}\text{H}_{12}\text{F}_3\text{NO}_2+\text{Na}$  342.0718, found 342.0714.

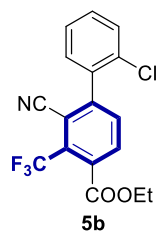

**5b:** Obtained as a white solid; yield: 75% (53.1 mg) after flash chromatography. mp 68-70 °C,  $^1\text{H}$  NMR (400 MHz,  $\text{CDCl}_3$ ):  $\delta$  = 7.83 (d,  $J$  = 8.0 Hz, 1H), 7.7 (d,  $J$  = 8.0 Hz, 1H), 7.56 (dd,  $J_1$  = 8.0 Hz,  $J_2$  = 1.2 Hz, 1H), 7.48-7.40 (m, 2H), 7.34 (dd,  $J_1$  = 7.6 Hz,  $J_2$  = 2.0 Hz, 1H), 4.45 (q,  $J$  = 7.2 Hz, 2H), 1.41 (t,  $J$  = 6.8 Hz, 3H) ppm;  $^{13}\text{C}$  NMR (100 MHz,  $\text{CDCl}_3$ ):  $\delta$  = 166.26, 147.22, 133.98, 133.56 (d,  $J_{\text{CF}}$  = 2.5 Hz), 132.82, 132.03, 131.10, 130.80, 130.74 (d,  $J_{\text{CF}}$  = 32.6 Hz), 130.57, 130.21, 127.23, 121.97 (d,  $J_{\text{CF}}$  = 274.1 Hz), 113.68, 111.90, 63.00, 13.88 ppm. ESI HRMS: calcd. For  $\text{C}_{17}\text{H}_{11}\text{ClF}_3\text{NO}_2+\text{Na}$  376.0328, found 376.0325.



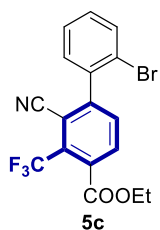

**5c:** Obtained as a white solid; yield: 71% (56.5 mg) after flash chromatography. mp 96-98 °C,  $^1\text{H}$  NMR (600 MHz,  $\text{CDCl}_3$ ):  $\delta$  = 7.82 (d,  $J$  = 8.4 Hz, 1H), 7.73 (d,  $J_1$  = 8.4 Hz,  $J_2$  = 1.2 Hz, 1H), 7.66 (d,  $J$  = 7.8 Hz, 1H), 7.46 (td,  $J_1$  = 8.4 Hz,  $J_2$  = 1.2 Hz, 1H), 7.36 (td,  $J_1$  = 7.8 Hz,  $J_2$  = 1.8 Hz, 1H), 7.31 (dd,  $J_1$  = 7.8 Hz,  $J_2$  = 1.8 Hz, 1H), 4.44 (q,  $J$  = 7.2 Hz, 2H), 1.40 (t,  $J$  = 7.2 Hz, 3H) ppm;  $^{13}\text{C}$  NMR (150 MHz,  $\text{CDCl}_3$ ):  $\delta$  = 166.36, 137.54, 134.02, 133.60 (d,  $J_{\text{CF}}$  = 2.3 Hz), 133.43, 133.43, 132.11, 131.27, 130.75, 130.74 (d,  $J_{\text{CF}}$  = 32.9 Hz), 127.89, 122.57, 122.03 (d,  $J_{\text{CF}}$  = 274.2 Hz), 113.73, 111.93, 63.10, 13.97 ppm. ESI HRMS: calcd. For  $\text{C}_{17}\text{H}_{11}\text{BrF}_3\text{NO}_2 + \text{Na}$  419.9823, found 419.9819.

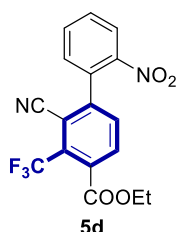

**5d:** Obtained as a white solid; yield: 80% (58.3 mg) after flash chromatography. mp 74-76 °C,  $^1\text{H}$  NMR (400 MHz,  $\text{CDCl}_3$ ):  $\delta$  = 8.29 (dd,  $J_1$  = 8.0 Hz,  $J_2$  = 0.8 Hz, 1H), 7.84 (d,  $J$  = 8.0 Hz, 1H), 7.82-7.71 (m, 2H), 7.61 (d,  $J$  = 8.0 Hz, 1H), 7.41 (dd,  $J_1$  = 7.6 Hz,  $J_2$  = 1.6 Hz, 1H), 4.45 (q,  $J$  = 7.2 Hz, 2H), 1.42 (t,  $J$  = 7.2 Hz, 3H) ppm;  $^{13}\text{C}$  NMR (100 MHz,  $\text{CDCl}_3$ ):  $\delta$  = 166.02, 147.41, 146.86, 133.98, 133.62 (d,  $J_{\text{CF}}$  = 2.3 Hz), 132.49, 132.07, 132.00, 131.94, 130.97, 130.77 (d,  $J_{\text{CF}}$  = 32.9 Hz), 125.51, 121.86 (d,  $J_{\text{CF}}$  = 274.2 Hz), 113.61, 111.14, 63.05, 13.87 ppm. ESI HRMS: calcd. For  $\text{C}_{17}\text{H}_{11}\text{F}_3\text{N}_2\text{O}_4 + \text{Na}$  387.0569, found 387.0570.

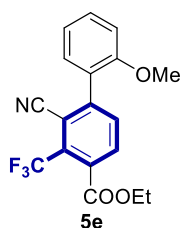

**5e:** Obtained as a white solid; yield: 75% (52.4 mg) after flash chromatography. mp 86-88 °C,  $^1\text{H}$  NMR (400 MHz,  $\text{CDCl}_3$ ):  $\delta$  = 7.77 (d,  $J$  = 8.0 Hz, 1H), 7.67 (d,  $J$  = 8.0 Hz, 1H), 7.47 (m, 1H), 7.23 (dd,  $J_1$  = 7.6 Hz,  $J_2$  = 1.6 Hz, 1H), 7.08 (t,  $J$  = 7.2 Hz, 1H), 7.04 (d,  $J$  = 8.4 Hz, 1H), 4.43 (q,  $J$  = 7.2 Hz, 2H), 3.83 (s, 3H), 1.40 (t,  $J$  = 7.2 Hz, 3H) ppm;  $^{13}\text{C}$  NMR (100 MHz,  $\text{CDCl}_3$ ):  $\delta$  = 166.61, 156.41, 147.06, 134.16, 132.63 (d,  $J_{\text{CF}}$  = 2.5 Hz), 131.86, 131.38, 130.57, 130.46 (d,  $J_{\text{CF}}$  = 32.2 Hz), 125.54, 122.17 (d,  $J_{\text{CF}}$  = 274.2 Hz), 120.94, 114.42, 111.54, 62.80, 55.52, 13.89 ppm. ESI HRMS: calcd. For  $\text{C}_{18}\text{H}_{14}\text{F}_3\text{NO}_3 + \text{Na}$  372.0823, found 372.0825.

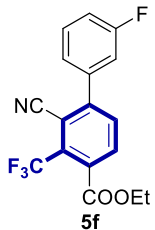

**5f:** Obtained as a white solid; yield: 75% (50.6 mg) after flash chromatography. mp 95-97 °C,  $^1\text{H}$  NMR (400 MHz,  $\text{CDCl}_3$ ):  $\delta$  = 7.82 (d,  $J$  = 8.4 Hz, 1H), 7.72 (d,  $J$  = 8.0 Hz, 1H), 7.54-7.48 (m, 1H), 7.31 (d,  $J$  = 8.0 Hz, 1H), 7.24-7.20 (m, 2H), 4.44 (q,  $J$  = 7.2 Hz, 2H), 1.40 (t,  $J$  = 6.8 Hz, 3H) ppm;  $^{13}\text{C}$  NMR (100 MHz,  $\text{CDCl}_3$ ):  $\delta$  = 166.21, 162.68 (d,  $J_{\text{CF}}$  = 247.0 Hz), 148.26, 138.44 (d,  $J_{\text{CF}}$  = 7.8 Hz), 133.45 (d,  $J_{\text{CF}}$  = 2.5 Hz), 133.26, 132.34, 131.28 (d,  $J_{\text{CF}}$  = 32.5 Hz), 130.69 (d,  $J_{\text{CF}}$  = 8.3 Hz), 124.83 (d,  $J_{\text{CF}}$  = 3.1 Hz), 121.98 (d,  $J_{\text{CF}}$  = 274.2 Hz), 116.80 (d,  $J_{\text{CF}}$  = 20.9 Hz), 116.17 (d,  $J_{\text{CF}}$  = 22.8 Hz), 114.11, 110.39, 63.00, 13.87 ppm. ESI HRMS: calcd. For  $\text{C}_{17}\text{H}_{11}\text{F}_4\text{NO}_2 + \text{Na}$  360.0624, found 360.0625.

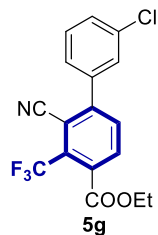

**5g:** Obtained as a white solid; yield: 80% (56.6 mg) after flash chromatography. mp 89-91 °C,  $^1\text{H}$  NMR (400 MHz,  $\text{CDCl}_3$ ):  $\delta$  = 7.82 (d,  $J$  = 8.0 Hz, 1H), 7.71 (d,  $J$  = 8.0 Hz, 1H), 7.51-7.41 (m, 4H), 4.44 (q,  $J$  = 7.2 Hz, 2H), 1.40 (t,  $J$  = 7.2 Hz, 3H) ppm;  $^{13}\text{C}$  NMR (100 MHz,  $\text{CDCl}_3$ ):  $\delta$  = 166.19, 148.11, 138.17, 134.96, 133.49 (d,  $J_{\text{CF}}$  = 2.6 Hz), 133.25, 132.37, 131.27 (d,  $J_{\text{CF}}$  = 32.3 Hz), 130.23, 129.89, 129.00, 127.213, 121.97 (d,  $J_{\text{CF}}$  = 274.3 Hz), 114.10, 110.38, 63.01, 13.87 ppm. ESI HRMS: calcd. For  $\text{C}_{17}\text{H}_{11}\text{ClF}_3\text{NO}_2 + \text{Na}$  376.0328, found 376.0326.

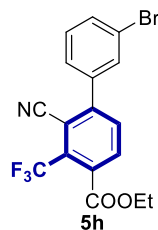

**5h:** Obtained as a white solid; yield: 76% (60.5 mg) after flash chromatography. mp 102-104 °C,  $^1\text{H}$  NMR (400 MHz,  $\text{CDCl}_3$ ):  $\delta$  = 7.81 (d,  $J$  = 8.4 Hz, 1H), 7.71 (d,  $J$  = 8.0 Hz, 1H), 7.66 (d,  $J$  = 8.0 Hz, 1H), 7.64 (d,  $J$  = 1.2 Hz, 1H), 7.48 (d,  $J$  = 7.6 Hz, 1H), 7.40 (dd,  $J_1$  = 8.0 Hz,  $J_2$  = 7.6 Hz, 1H), 4.44 (q,  $J$  = 7.2 Hz, 2H), 1.40 (t,  $J$  = 7.2 Hz, 3H) ppm;  $^{13}\text{C}$  NMR (100 MHz,  $\text{CDCl}_3$ ):  $\delta$  = 166.19, 148.00, 138.42, 133.47 (d,  $J_{\text{CF}}$  = 2.7 Hz), 133.24, 132.82, 132.36, 131.834, 131.29 (d,  $J_{\text{CF}}$  = 32.6 Hz), 130.43, 127.66, 122.96, 122.54 (d,  $J_{\text{CF}}$  = 273.9 Hz), 114.08, 110.25, 63.01, 13.87 ppm. ESI HRMS: calcd. For  $\text{C}_{17}\text{H}_{11}\text{BrF}_3\text{NO}_2 + \text{Na}$  419.9823, found 419.9821.

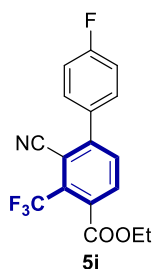

**5i:** Obtained as a white solid; yield: 71% (47.9 mg) after flash chromatography. mp 44-46 °C,  $^1\text{H}$  NMR (400 MHz,  $\text{CDCl}_3$ ):  $\delta$  = 7.80 (d,  $J$  = 8.4 Hz, 1H), 7.70 (d,  $J$  = 8.0 Hz, 1H), 7.51 (dd,  $J_1$  = 8.8 Hz,  $J_2$  = 5.2 Hz, 2H), 7.223 (t,  $J$  = 8.8 Hz, 2H), 4.43 (q,  $J$  = 6.8 Hz, 2H), 1.40 (t,  $J$  = 7.2 Hz, 3H) ppm;  $^{13}\text{C}$  NMR (100 MHz,  $\text{CDCl}_3$ ):  $\delta$  = 166.29, 163.64 (d,  $J_{\text{CF}}$  = 249.1 Hz), 148.65, 133.29, 133.11 (d,  $J_{\text{CF}}$  = 2.7 Hz), 132.56 (d,  $J_{\text{CF}}$  = 3.6 Hz), 132.29, 131.25 (d,  $J_{\text{CF}}$  = 32.4 Hz), 130.95 (d,  $J_{\text{CF}}$  = 8.6 Hz), 123.38, 120.73 (d,  $J_{\text{CF}}$  = 277.4 Hz), 116.17 (d,  $J_{\text{CF}}$  = 21.9 Hz), 112.28, 114.37, 110.32, 62.96, 13.87 ppm. ESI HRMS: calcd. For  $\text{C}_{17}\text{H}_{11}\text{F}_4\text{NO}_2 + \text{Na}$  360.0624, found 360.0627.

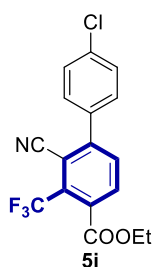

**5j:** Obtained as a white solid; yield: 77% (54.5 mg) after flash chromatography. mp 94-96 °C,  $^1\text{H}$  NMR (400 MHz,  $\text{CDCl}_3$ ):  $\delta$  = 7.81 (d,  $J$  = 8.4 Hz, 1H), 7.70 (d,  $J$  = 8.0 Hz, 1H), 7.51 (dd,  $J_1$  = 6.4,  $J_2$  = 2.0 Hz, 2H), 7.46 (dd,  $J_1$  = 6.4 Hz,  $J_2$  = 2.0 Hz, 2H), 4.43 (q,  $J$  = 6.8 Hz, 2H), 1.40 (t,  $J$  = 7.2 Hz, 3H) ppm;  $^{13}\text{C}$  NMR (100 MHz,  $\text{CDCl}_3$ ):  $\delta$  = 166.23, 148.45, 136.27, 134.89, 133.29 (d,  $J_{\text{CF}}$  = 2.4 Hz), 133.20, 132.36, 131.31 (d,  $J_{\text{CF}}$  = 32.3 Hz), 130.29, 129.28, 121.96 (d,  $J_{\text{CF}}$  = 268.2 Hz), 114.29, 110.27, 62.99, 13.87 ppm. ESI HRMS: calcd. For  $\text{C}_{17}\text{H}_{11}\text{ClF}_3\text{NO}_2 + \text{Na}$  376.0328, found 376.0331.

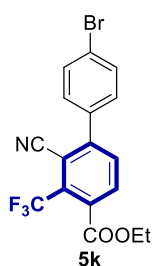

**5k:** Obtained as a white solid; yield: 70% (55.7 mg) after flash chromatography. mp 101-103 °C,  $^1\text{H}$  NMR (400 MHz,  $\text{CDCl}_3$ ):  $\delta$  = 7.80 (d,  $J$  = 8.0 Hz, 1H), 7.70 (d,  $J$  = 8.4 Hz, 1H), 7.67 (d,  $J$  = 8.4 Hz, 1H), 7.40 (d,  $J$  = 8.4 Hz, 1H), 4.43 (q,  $J$  = 7.2 Hz, 2H), 1.40 (t,  $J$  = 7.2 Hz, 3H) ppm.  $^{13}\text{C}$  NMR (100 MHz,  $\text{CDCl}_3$ ):  $\delta$  = 166.23, 148.46, 135.36, 133.31 (d,  $J_{\text{CF}}$  = 2.5 Hz), 133.14, 132.38, 132.23, 131.32 (d,  $J_{\text{CF}}$  = 32.4 Hz), 130.51, 124.52, 121.98 (d,  $J_{\text{CF}}$  = 274.4 Hz), 114.28, 110.20, 62.99, 13.87 ppm. ESI HRMS: calcd. For  $\text{C}_{17}\text{H}_{11}\text{BrF}_3\text{NO}_2 + \text{Na}$  419.9823, found 419.9826.

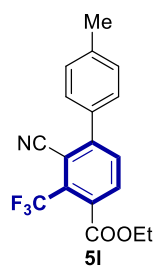

**5l:** Obtained as a white solid; yield: 80% (53.3 mg) after flash chromatography. mp 62-64 °C,  $^1\text{H}$  NMR (400 MHz,  $\text{CDCl}_3$ ):  $\delta$  = 7.77 (d,  $J$  = 8.0 Hz, 1H), 7.70 (d,  $J$  = 8.0 Hz, 1H), 7.42 (d,  $J$  = 8.4 Hz, 2H), 7.33 (d,  $J$  = 8.0 Hz, 2H), 4.43 (q,  $J$  = 7.2 Hz, 2H), 2.44 (s, 3H), 1.40 (t,  $J$  = 7.2 Hz, 3H) ppm;  $^{13}\text{C}$  NMR (100 MHz,  $\text{CDCl}_3$ ):  $\delta$  = 166.48, 149.85, 139.96, 133.68, 133.32, 132.68 (d,  $J_{\text{CF}}$  = 2.5 Hz), 132.12, 131.13 (d,  $J_{\text{CF}}$  = 32.3 Hz), 129.64, 128.85, 122.12 (d,  $J_{\text{CF}}$  = 274.2 Hz), 114.63, 110.12, 62.867, 21.33, 13.88 ppm. ESI HRMS: calcd. For  $\text{C}_{18}\text{H}_{14}\text{F}_3\text{NO}_2 + \text{Na}$  356.0874, found 356.0877.

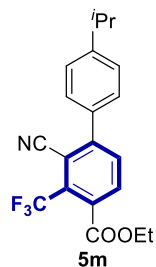

**5m:** Obtained as a white solid; yield: 71% (51.3 mg) after flash chromatography. mp 58-60 °C,  $^1\text{H}$  NMR (600 MHz,  $\text{CDCl}_3$ ):  $\delta$  = 7.82 (d,  $J$  = 7.8 Hz, 1H), 7.76 (d,  $J$  = 7.8 Hz, 1H), 7.51-7.49 (m, 2H), 7.43-7.40 (m, 2H), 4.47 (q,  $J$  = 7.2 Hz, 2H), 3.05-3.01 (m, 1H), 1.44 (t,  $J$  = 7.2 Hz, 3H), 1.34 (d,  $J$  = 6.6 Hz, 6H) ppm;  $^{13}\text{C}$  NMR (150 MHz,  $\text{CDCl}_3$ ):  $\delta$  = 166.60, 150.79, 149.87, 133.99, 133.49, 132.70 (d,  $J_{\text{CF}}$  = 2.9 Hz), 132.20, 131.22 (d,  $J_{\text{CF}}$  = 32.1 Hz), 129.05, 127.14, 122.20 (d,  $J_{\text{CF}}$  = 274.2 Hz), 114.74, 110.06, 62.96, 34.06, 23.92, 13.96 ppm. ESI HRMS: calcd. For  $\text{C}_{20}\text{H}_{18}\text{F}_3\text{NO}_2 + \text{Na}$  384.1187, found 384.1185.

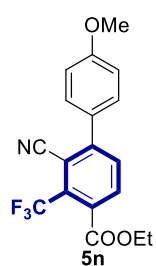

**5n:** Obtained as a white solid; yield: 85% (59.4 mg) after flash chromatography. mp 101-103 °C,  $^1\text{H}$  NMR (400 MHz,  $\text{CDCl}_3$ ):  $\delta$  = 7.76 (d,  $J$  = 8.0 Hz, 1H), 7.70 (d,  $J$  = 8.0 Hz, 1H), 7.48 (dd,  $J_1$  = 6.8 Hz,  $J_2$  = 2.0 Hz, 2H), 7.04 (dd,  $J_1$  = 6.8 Hz,  $J_2$  = 2.0 Hz, 2H), 4.42 (q,  $J$  = 7.2 Hz, 2H), 3.88 (s, 1H), 1.40 (t,  $J$  = 7.2 Hz, 3H) ppm;  $^{13}\text{C}$  NMR (100 MHz,  $\text{CDCl}_3$ ):  $\delta$  = 166.51, 160.85, 149.51, 133.24, 132.43 (d,  $J_{\text{CF}}$  = 2.5 Hz), 132.11, 131.19 (d,  $J_{\text{CF}}$  = 32.2 Hz), 130.40, 128.76, 122.12 (d,  $J_{\text{CF}}$  = 274.3 Hz), 114.76, 109.93, 62.85, 55.43, 13.88 ppm. ESI HRMS: calcd. For  $\text{C}_{18}\text{H}_{14}\text{F}_3\text{NO}_3 + \text{Na}$  372.0823, found 372.0821.

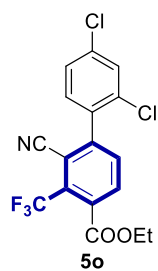

**5o:** Obtained as a white solid; yield: 77% (59.8 mg) after flash chromatography. mp 110-112 °C,  $^1\text{H}$  NMR (600 MHz,  $\text{CDCl}_3$ ):  $\delta$  = 7.83 (d,  $J$  = 8.4 Hz, 1H), 7.66 (d,  $J$  = 8.4 Hz, 1H), 7.58 (d,  $J$  = 1.8 Hz, 1H), 7.40 (dd,  $J_1$  = 8.4 Hz,  $J_2$  = 2.4 Hz, 1H), 7.27 (d,  $J$  = 8.4 Hz, 1H), 4.44 (q,  $J$  = 7.2 Hz, 2H), 1.40 (t,  $J$  = 7.2 Hz, 1H) ppm;  $^{13}\text{C}$  NMR (150 MHz,  $\text{CDCl}_3$ ):  $\delta$  = 166.14, 146.15, 136.75, 134.00, 133.95, 133.92, 133.80, 132.28, 131.65, 130.96 (d,  $J_{\text{CF}}$  = 32.4 Hz), 130.27, 127.80, 121.94 (d,  $J_{\text{CF}}$  = 274.4 Hz), 113.65, 108.80, 63.17, 13.96 ppm. ESI HRMS: calcd. For  $\text{C}_{17}\text{H}_{10}\text{Cl}_2\text{F}_3\text{NO}_2 + \text{Na}$  409.9938, found 409.9937.

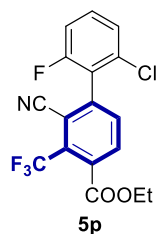

**5p:** Obtained as a white solid; yield: 75% (55.8 mg) after flash chromatography. mp 65-67 °C,  $^1\text{H}$  NMR (400 MHz,  $\text{CDCl}_3$ ):  $\delta$  = 7.87 (d,  $J$  = 8.0 Hz, 1H), 7.69 (d,  $J$  = 8.0 Hz, 1H), 7.48-7.38 (m, 2H), 7.21-7.17 (m, 1H), 4.46 (q,  $J$  = 7.2 Hz, 2H), 1.42 (t,  $J$  = 7.2 Hz, 3H) ppm;  $^{13}\text{C}$  NMR (100 MHz,  $\text{CDCl}_3$ ):  $\delta$  = 166.10, 161.17, 158.67, 141.09, 134.57, 134.25 (d,  $J_{\text{CF}}$  = 3.5 Hz), 134.14 (d,  $J_{\text{CF}}$  = 2.5 Hz), 132.34, 131.91 (d,  $J_{\text{CF}}$  = 9.4 Hz), 130.94 (d,  $J_{\text{CF}}$  = 32.8 Hz), 125.87 (d,  $J_{\text{CF}}$  = 18.8 Hz), 121.89 (d,  $J_{\text{CF}}$  = 274.4 Hz), 114.77 (d,  $J_{\text{CF}}$  = 21.8 Hz), 113.34, 112.86, 63.06, 13.88 ppm. ESI HRMS: calcd. For  $\text{C}_{17}\text{H}_{10}\text{ClF}_4\text{NO}_2 + \text{Na}$  394.0234, found 394.0235.

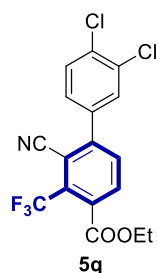

**5q:** Obtained as a white solid; yield: 77% (59.8 mg) after flash chromatography. mp 118-120 °C,  $^1\text{H}$  NMR (400 MHz,  $\text{CDCl}_3$ ):  $\delta$  = 7.83 (d,  $J$  = 8.0 Hz, 1H), 7.70 (d,  $J$  = 8.0 Hz, 1H), 7.64 (d,  $J$  = 8.4 Hz, 1H), 7.59 (d,  $J$  = 2.0 Hz, 1H), 7.39 (dd,  $J_1$  = 8.0 Hz,  $J_2$  = 2.0 Hz, 1H), 4.44 (q,  $J$  = 6.8 Hz, 2H), 1.40 (t,  $J$  = 7.2 Hz, 3H) ppm;  $^{13}\text{C}$  NMR (150 MHz,  $\text{CDCl}_3$ ):  $\delta$  = 166.05, 147.04, 136.24, 134.56, 133.74 (d,  $J_{\text{CF}}$  = 2.6 Hz), 133.10, 132.52, 131.02, 130.82, 128.23, 126.01, 121.86 (d,  $J_{\text{CF}}$  = 270.6 Hz), 114.012, 110.39, 63.07, 13.87 ppm. ESI HRMS: calcd. For  $\text{C}_{17}\text{H}_{10}\text{Cl}_2\text{F}_3\text{NO}_2 + \text{Na}$  409.9938, found 409.9941.

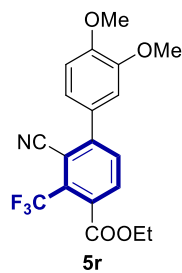

**5r:** Obtained as a white solid; yield: 79% (60.0 mg) after flash chromatography. mp 128-130 °C,  $^1\text{H}$  NMR (400 MHz,  $\text{CDCl}_3$ ):  $\delta$  = 7.77 (d,  $J$  = 8.4 Hz, 1H), 7.73 (d,  $J$  = 8.4 Hz, 1H), 7.10 (dd,  $J_1$  = 8.0 Hz,  $J_2$  = 2.0 Hz, 1H), 7.05 (d,  $J$  = 2.0 Hz, 1H), 7.00 (d,  $J$  = 8.4 Hz, 1H), 4.43 (q,  $J$  = 7.2 Hz, 2H), 3.95 (s, 1H), 3.95 (s, 1H), 1.40 (t,  $J$  = 7.2 Hz, 3H) ppm;  $^{13}\text{C}$  NMR (100 MHz,  $\text{CDCl}_3$ ):  $\delta$  = 166.48, 150.41, 149.54, 149.11, 133.26, 132.54 (d,  $J_{\text{CF}}$  = 2.4 Hz), 132.09, 131.22 (d,  $J_{\text{CF}}$  = 32.1 Hz), 128.95, 122.12 (d,  $J_{\text{CF}}$  = 275.9 Hz), 121.95, 114.77, 112.16, 111.37, 109.95, 62.86, 56.16, 56.03, 13.88 ppm. ESI HRMS: calcd. For  $\text{C}_{19}\text{H}_{16}\text{F}_3\text{NO}_4 + \text{Na}$  402.0929, found 402.0926.

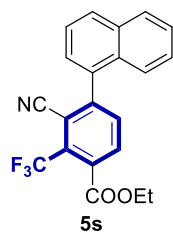

**5s:** Obtained as a white solid; yield: 83% (61.3 mg) after flash chromatography. mp 99-101 °C,  $^1\text{H}$  NMR (600 MHz,  $\text{CDCl}_3$ ):  $\delta$  = 8.33 (s, 1H), 8.04 (d,  $J$  = 8.4 Hz, 1H), 7.81 (d,  $J$  = 8.4 Hz, 1H), 7.61-7.55 (m, 2H), 7.51-7.48 (m, 1H), 7.41 (dd,  $J_1$  = 6.6 Hz,  $J_2$  = 0.6 Hz, 1H), 4.51 (q,  $J$  = 7.2 Hz, 2H), 1.45 (t,  $J$  = 7.2 Hz, 3H) ppm;  $^{13}\text{C}$  NMR (150 MHz,  $\text{CDCl}_3$ ):  $\delta$  = 164.29, 142.42, 135.26 (d,  $J_{\text{CF}}$  = 2.4 Hz), 133.98 (d,  $J_{\text{CF}}$  = 33.9 Hz), 133.58, 131.27, 130.76, 129.14, 128.95, 127.91, 127.51, 127.28, 126.97, 125.32, 123.63, 122.11, 121.19 (d,  $J_{\text{CF}}$  = 274.7 Hz), 116.65, 112.12, 63.99, 13.96 ppm. ESI HRMS: calcd. For  $\text{C}_{21}\text{H}_{14}\text{F}_3\text{NO}_2 + \text{Na}$  392.0874, found 392.0876.

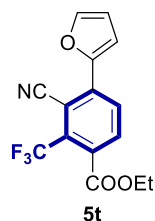

**5t:** Obtained as a white solid; yield: 68% (42.1 mg) after flash chromatography. mp 86-88 °C,  $^1\text{H}$  NMR (400 MHz,  $\text{CDCl}_3$ ):  $\delta$  = 8.15 (d,  $J$  = 8.4 Hz, 1H), 7.76 (d,  $J$  = 8.4 Hz, 1H), 7.63 (d,  $J$  = 1.2 Hz, 1H), 7.58 (d,  $J$  = 3.6 Hz, 1H), 6.63 (dd,  $J_1$  = 3.6 Hz,  $J_2$  = 1.6 Hz, 1H), 4.41 (q,  $J$  = 7.2 Hz, 2H), 1.39 (t,  $J$  = 7.2 Hz, 3H) ppm;  $^{13}\text{C}$  NMR (100 MHz,  $\text{CDCl}_3$ ):  $\delta$  = 166.35, 147.82, 144.70, 136.84, 132.42, 131.97 (d,  $J_{\text{CF}}$  = 2.6 Hz), 131.72 (d,  $J_{\text{CF}}$  = 32.2 Hz), 129.13, 122.06 (d,  $J_{\text{CF}}$  = 274.2 Hz), 115.01, 113.77, 112.89, 110.52, 62.85, 13.86 ppm. ESI HRMS: calcd. For  $\text{C}_{15}\text{H}_{10}\text{F}_3\text{NO}_3 + \text{Na}$  332.0510, found 332.0515.

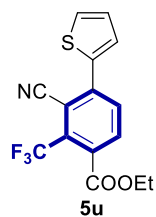

**5u:** Obtained as a white solid; yield: 70% (45.5 mg) after flash chromatography. mp 98-100 °C,  $^1\text{H}$  NMR (400 MHz,  $\text{CDCl}_3$ ):  $\delta$  = 7.83 (d,  $J$  = 8.0 Hz, 1H), 7.74 (d,  $J$  = 8.4 Hz, 1H), 7.68 (dd,  $J_1$  = 3.6 Hz,  $J_2$  = 0.8 Hz, 1H), 7.55 (dd,  $J_1$  = 5.2 Hz,  $J_2$  = 1.2 Hz, 1H), 7.21 (dd,  $J_1$  = 5.2 Hz,  $J_2$  = 3.6 Hz, 1H), 4.42 (q,  $J$  = 7.2 Hz, 2H), 1.39 (t,  $J$  = 7.2 Hz, 3H) ppm;  $^{13}\text{C}$  NMR (100 MHz,  $\text{CDCl}_3$ ):  $\delta$  = 166.26, 141.84, 137.08, 133.19, 132.77 (d,  $J_{\text{CF}}$  = 2.5 Hz), 132.30, 131.82 (d,  $J_{\text{CF}}$  = 32.3 Hz), 129.67, 129.10, 128.54, 121.99 (d,  $J_{\text{CF}}$  = 274.3 Hz), 114.67, 109.07, 62.93, 13.86 ppm. ESI HRMS: calcd. For  $\text{C}_{15}\text{H}_{10}\text{F}_3\text{NO}_2\text{S}+\text{Na}$  348.0282, found 348.0281.

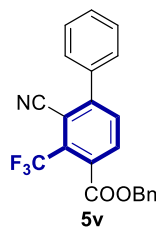

**5v:** Obtained as a white solid; yield: 76% (65.1 mg) after flash chromatography. mp 91-93 °C,  $^1\text{H}$  NMR (600 MHz,  $\text{CDCl}_3$ ):  $\delta$  = 7.79 (d,  $J$  = 7.8 Hz, 1H), 7.71 (d,  $J$  = 7.8 Hz, 1H), 7.53-7.49 (m, 5H), 7.44-7.36 (m, 5H), 5.38 (s, 2H) ppm;  $^{13}\text{C}$  NMR (150 MHz,  $\text{CDCl}_3$ ):  $\delta$  = 166.18, 149.85, 136.48, 134.46, 133.40, 132.50, 132.20, 131.21 (q,  $J_{\text{CF}}$  = 31.5 Hz), 129.75, 128.92, 128.84, 128.74, 128.71, 122.03 (q,  $J_{\text{CF}}$  = 274.5 Hz), 114.37, 110.31, 68.71 ppm. ESI HRMS: calcd. For  $\text{C}_{22}\text{H}_{14}\text{F}_3\text{NO}_2+\text{Na}$  404.0874, found 404.0870.

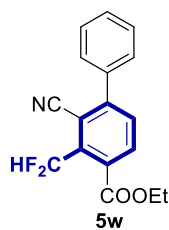

**5w:** Obtained as a white solid; yield: 73% (50.9 mg) after flash chromatography. mp 96-98 °C,  $^1\text{H}$  NMR (600 MHz,  $\text{CDCl}_3$ ):  $\delta$  = 8.12 (d,  $J$  = 8.4 Hz, 1H), 7.63 (t,  $J$  = 53.4 Hz, 1H), 7.66 (d,  $J$  = 8.4 Hz, 1H), 7.54-7.50 (m, 5H), 4.45 (q,  $J$  = 7.2 Hz, 2H), 1.43 (t,  $J$  = 7.2 Hz, 3H) ppm;  $^{13}\text{C}$  NMR (150 MHz,  $\text{CDCl}_3$ ):  $\delta$  = 165.09, 151.29, 150.85, 137.7 (t,  $J_{\text{CF}}$  = 21.5 Hz), 136.80, 133.74, 132.16, 130.31 (t,  $J_{\text{CF}}$  = 4.5 Hz), 129.65, 128.92, 128.87, 115.13, 110.80 (t,  $J_{\text{CF}}$  = 239.1 Hz), 62.64, 114.12 ppm. ESI HRMS: calcd. For  $\text{C}_{17}\text{H}_{13}\text{F}_2\text{NO}_2+\text{Na}$  324.0812, found 324.0811.

## 5. Control experiments

### 5.1 Control experiment of **1a** and **2b**

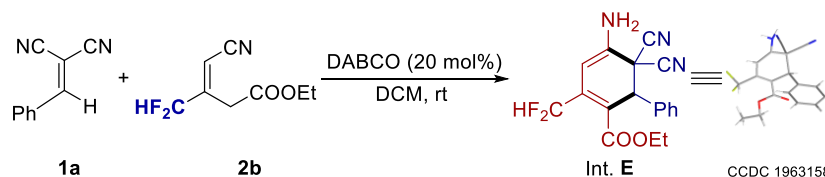

The reaction was carried out with **1a** (0.20 mmol) and **2b** (0.24 mmol), and DABCO (0.04 mmol) in DCM (1 mL) at room temperature. The reaction was monitored by TLC until the reaction produced yellow spots. Stop the reaction immediately, then the reaction mixture was concentrated and the residue was purified by flash chromatography on silica gel (petroleum ether/ethyl acetate = 10:1) to give the corresponding Int. E, which was further analyzed by <sup>1</sup>H NMR, <sup>13</sup>C HMR, HRMS and X-ray diffraction analysis.

Obtained as a yellow solid; yield: 90% (61.8 mg) after flash chromatography. <sup>1</sup>H NMR (700 MHz, CDCl<sub>3</sub>): δ = 7.51 (t, *J* = 54.6 Hz, 1H), 7.38-7.31 (m, 5H), 5.76 (s, 1H), 4.69 (d, *J* = 2.8 Hz, 1H), 4.56 (s, 2H), 4.14 (q, *J* = 7.0 Hz, 2H), 1.19 (t, *J* = 7.0 Hz, 3H) ppm; <sup>13</sup>C NMR (175 MHz, CDCl<sub>3</sub>): δ = 163.56, 141.87 (t, *J*<sub>CF</sub> = 22.6 Hz), 135.68, 131.61, 129.78, 129.11, 128.97, 117.57 (t, *J*<sub>CF</sub> = 7.4 Hz), 112.98, 111.25, 109.98 (t, *J*<sub>CF</sub> = 236.6 Hz), 93.06 (t, *J*<sub>CF</sub> = 6.0 Hz), 61.65, 48.65, 41.66, 13.87 ppm. ESI HRMS: calcd. For C<sub>18</sub>H<sub>15</sub>F<sub>2</sub>N<sub>3</sub>O<sub>2</sub>+Na 366.1030, found 366.1029.

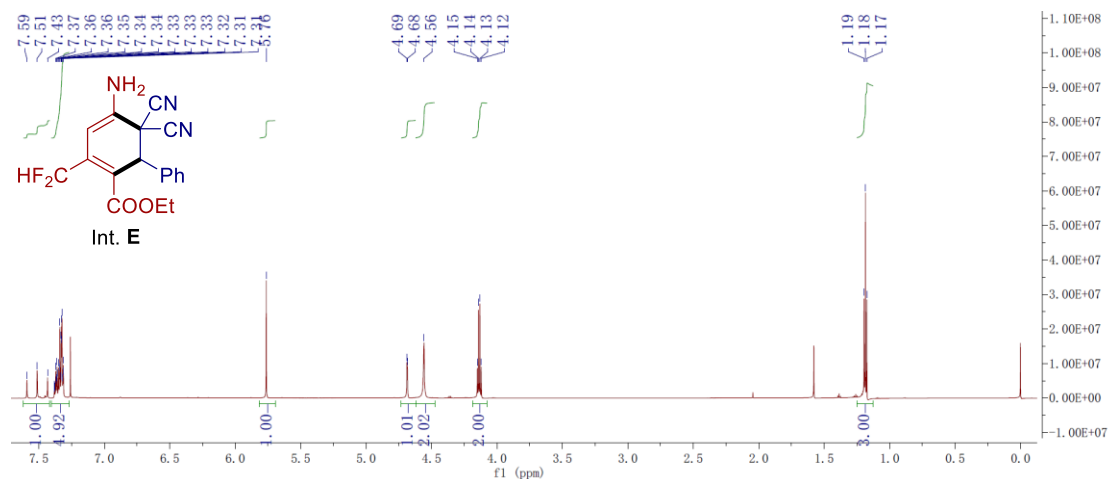



## 5.2 Control experiment of 4a and 2a

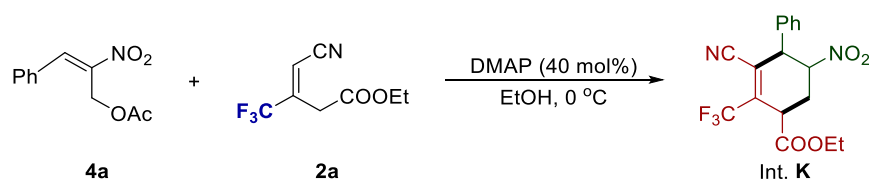

The reaction was carried out with **4a** (0.20 mmol) and **2a** (0.30 mmol), and DMAP (0.08 mmol) in EtOH (1 mL) at 0 °C. The reaction was monitored by TLC until the reaction was completion. Then the reaction mixture was concentrated and the residue was purified by flash chromatography on silica gel (petroleum ether/ethyl acetate = 40:1) to give the Int. **K**, which was further analyzed by <sup>1</sup>H NMR, <sup>13</sup>C HMR, HRMS analysis.

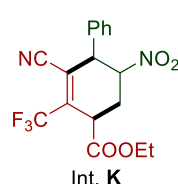

Obtained as a white solid; yield: 86% (63.3 mg) after flash chromatography. <sup>1</sup>H NMR (400 MHz, CDCl<sub>3</sub>): δ = 7.46-7.38 (m, 3H), 7.30-7.29 (m, 2H), 4.98-4.92 (m, 1H), 3.40-4.26 (m, 3H), 3.83 (s, 1H), 2.70 (dt, *J*<sub>1</sub> = 13.6 Hz, *J*<sub>2</sub> = 3.6 Hz, 1H), 2.58-2.50 (m, 1H), 1.36 (t, *J* = 7.2 Hz, 3H) ppm; <sup>13</sup>C NMR (100 MHz, CDCl<sub>3</sub>): δ = 169.40, 139.04 (q, *J*<sub>CF</sub> = 32.1 Hz), 134.63, 129.82, 129.59, 128.47, 121.09 (d, *J*<sub>CF</sub> = 274.7 Hz), 119.93 (q, *J*<sub>CF</sub> = 3.2 Hz), 112.72 (d, *J*<sub>CF</sub> = 1.4 Hz), 84.22, 63.12, 47.96, 40.40, 29.26, 14.00 ppm. ESI HRMS: calcd. For C<sub>17</sub>H<sub>15</sub>F<sub>3</sub>N<sub>2</sub>O<sub>4</sub>+Na 391.0882, found 391.0882.

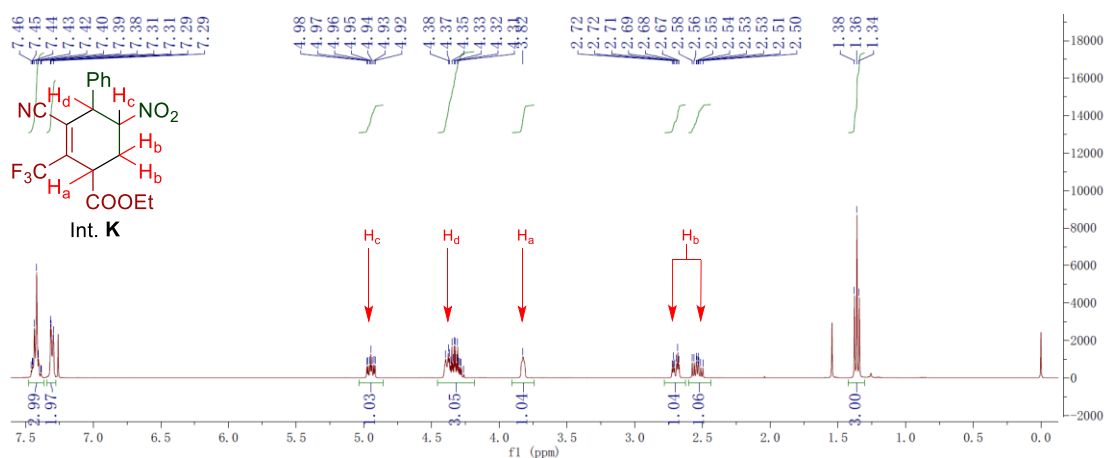

## 6. Procedures for the transformation

### 6.1 Transformation of 3a into 6

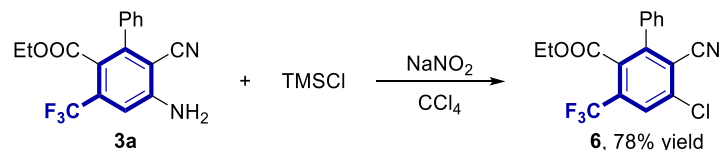

Trifluoromethylated benzene **3a** (0.10 mmol) was added into the mixture of NaNO<sub>2</sub> (0.30 mmol) and TMSCl (0.30 mmol) in CCl<sub>4</sub> at 0 °C, and the reaction mixture was stirred at 0 °C for 1.5 hour before warm up to room temperature. The reaction was stirred at room temperature for another 3 hours until the reaction was completion (monitored by TLC). Then, the reaction mixture was concentrated and the residue was purified by flash chromatography on silica gel (petroleum ether/ethyl acetate = 15:1) to give the final ethyl 5-chloro-6-cyano-3-(trifluoromethyl)-[1,1'-biphenyl]-2-carboxylate **6**, which was further analyzed by <sup>1</sup>H NMR, <sup>13</sup>C HMR, HRMS analysis.

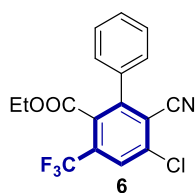

Obtained as a white solid; yield: 78% (27.6 mg) after flash chromatography. mp 131-133 °C, <sup>1</sup>H NMR (600 MHz, CDCl<sub>3</sub>): δ = 7.86 (s, 1H), 7.52-7.47 (m, 3H), 7.38-7.36 (m, 2H), 4.02 (q, *J* = 7.2 Hz, 2H), 0.96 (t, *J* = 6.6 Hz, 3H) ppm; <sup>13</sup>C NMR (150 MHz, CDCl<sub>3</sub>): δ = 164.44, 147.03, 138.80, 134.31, 132.11, 131.75 (q, *J*<sub>CF</sub> = 33.5 Hz), 129.96, 128.82, 128.71, 126.52 (q, *J*<sub>CF</sub> = 5.0 Hz), 121.88 (q, *J*<sub>CF</sub> = 273.8 Hz), 118.00, 113.60, 62.51, 13.40 ppm. ESI HRMS: calcd. For C<sub>17</sub>H<sub>11</sub>ClF<sub>3</sub>NO<sub>2</sub>+Na 376.0328, found 376.0326.

### 6.2 Transformation of 3a into 7

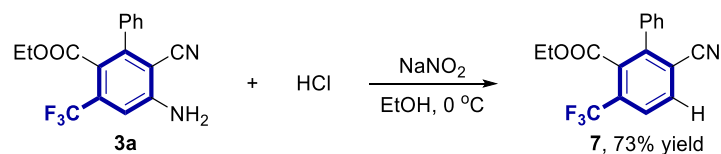

CF<sub>3</sub>-benzene **3a** (0.10 mmol) and NaNO<sub>2</sub> (0.30 mmol) were added into 1 mL EtOH at 0 °C, and then one drop of HCl was added to the reaction mixture. The reaction was stirred at room temperature for 3 hours until the reaction was completion (monitored by TLC). When the reaction was completed, the mixture was concentrated in vacuo. The residue was then dissolved in EA, and washed with water for several times. The organic phase was dried over anhydrous Na<sub>2</sub>SO<sub>4</sub> and concentrated in vacuo. Then, the reaction mixture was concentrated and the residue was purified by flash chromatography on silica gel (petroleum ether/ethyl acetate = 20:1) to give the target

compound **7**, which was further analyzed by  $^1\text{H}$  NMR,  $^{13}\text{C}$  HMR, HRMS analysis.

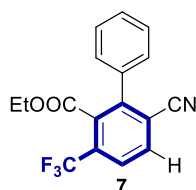

Obtained as a white solid; yield: 73% (46.6 mg) after flash chromatography. mp 129-131 °C,  $^1\text{H}$  NMR (400 MHz,  $\text{CDCl}_3$ ):  $\delta$  = 7.92 (dd,  $J_1$  = 8.4 Hz,  $J_2$  = 0.4 Hz, 1H), 7.81 (d,  $J$  = 8.4 Hz, 1H), 7.50-7.44 (m, 3H), 7.39-7.36 (m, 2H), 4.04 (q,  $J$  = 7.2 Hz, 2H), 0.98 (t,  $J$  = 7.2 Hz, 3H) ppm;  $^{13}\text{C}$  NMR (100 MHz,  $\text{CDCl}_3$ ):  $\delta$  = 165.10, 144.80, 134.74, 134.02 (q,  $J_{\text{CF}}$  = 1.9 Hz), 133.79, 131.10 (q,  $J_{\text{CF}}$  = 33.0 Hz), 129.63, 129.01, 128.61, 125.70 (q,  $J_{\text{CF}}$  = 4.7 Hz), 122.56 (q,  $J_{\text{CF}}$  = 273.1 Hz), 117.33, 116.29, 62.33, 13.44 ppm. ESI HRMS: calcd. For  $\text{C}_{17}\text{H}_{12}\text{F}_3\text{NO}_2 + \text{Na}$  342.0718, found 342.0715.

### 6.3 Transformation of **3a** into **8**

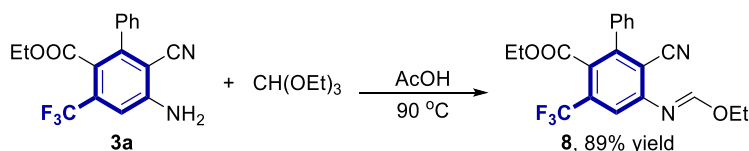

Trifluoromethylated benzene **3a** (0.10 mmol) was added into the mixture of triethyl orthoformate (0.5 mL) and acetic acid (0.2 mL) at 90 °C, and the reaction mixture was stirred for 2 hours until the reaction was completion (monitored by TLC). When the reaction was completed, the mixture was concentrated in vacuo. The residue was then dissolved in  $\text{CH}_2\text{Cl}_2$ , and washed with water for several times. The organic phase was dried over anhydrous  $\text{Na}_2\text{SO}_4$  and concentrated in vacuo. Then the reaction mixture was concentrated and the residue was purified by flash chromatography on silica gel (petroleum ether/ethyl acetate = 20:1) to give the corresponding compound **8**, which was further analyzed by  $^1\text{H}$  NMR,  $^{13}\text{C}$  HMR, HRMS analysis.

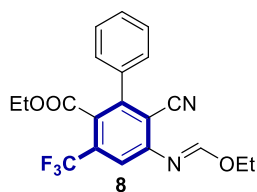

Obtained as a white solid; yield: 89% (69.5 mg) after flash chromatography. mp 141-143 °C,  $^1\text{H}$  NMR (600 MHz,  $\text{CDCl}_3$ ):  $\delta$  = 7.84 (s, 1H), 7.48-7.44 (m, 3H), 7.38-7.36 (m, 2H), 7.29 (s, 1H), 4.45 (q,  $J$  = 6.6 Hz, 2H), 4.00 (q,  $J$  = 7.2 Hz, 2H), 1.42 (t,  $J$  = 6.6 Hz, 3H), 0.96 (t,  $J$  = 7.2 Hz, 3H) ppm;  $^{13}\text{C}$  NMR (150 MHz,  $\text{CDCl}_3$ ):  $\delta$  = 165.52, 157.50, 152.56, 146.17, 135.32, 131.63 (q,  $J_{\text{CF}}$  = 32.9 Hz), 129.50, 128.98, 128.88, 128.58, 122.58 (q,  $J_{\text{CF}}$  = 273.3 Hz), 117.54, 114.77, 111.47, 64.19, 62.19, 14.02, 13.50 ppm. ESI HRMS: calcd. For  $\text{C}_{20}\text{H}_{17}\text{F}_3\text{N}_2\text{O}_3 + \text{Na}$  413.1089, found 413.1092.

## 6.4 Transformation of 3a into 9

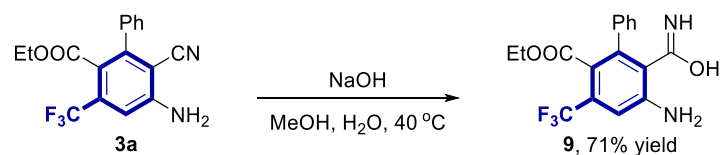

The reaction was carried out with **3a** (0.10 mmol) in the mixture of MeOH (1 mL) and 1M NaOH solution (1 mL) at 40 °C. The reaction mixture was stirred until the reaction was completion (monitored by TLC). The reaction mixture was allowed to cool down to rt, a large number of white solids precipitate. Simple filtration and washing with water gave the desired product **9**, which was further analyzed by  $^1\text{H}$  NMR,  $^{13}\text{C}$  HMR, HRMS analysis.

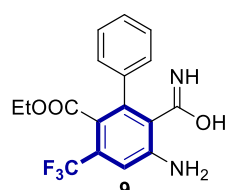

Obtained as a white solid; yield: 71% (25.0 mg) after flash chromatography. mp 128-130 °C,  $^1\text{H}$  NMR (600 MHz,  $(\text{CD}_3)_2\text{SO}$ ):  $\delta$  = 7.49 (s, 1H), 7.34-7.32 (m, 3H), 7.29 (s, 1H), 7.23-7.21 (m, 2H), 7.11 (s, 1H), 5.75 (s, 2H), 3.78 (q,  $J$  = 6.6 Hz, 2H), 0.79 (t,  $J$  = 7.2 Hz, 3H) ppm;  $^{13}\text{C}$  NMR (150 MHz,  $(\text{CD}_3)_2\text{SO}$ ):  $\delta$  = 167.95, 166.74, 146.15, 138.90, 137.43, 129.12, 127.65, 127.45, 126.45, 126.34 (d,  $J_{\text{CF}}$  = 31.1 Hz), 125.54, 123.57 (d,  $J_{\text{CF}}$  = 271.8 Hz), 119.15, 110.60 (d,  $J_{\text{CF}}$  = 4.7 Hz), 60.67, 13.28 ppm. ESI HRMS: calcd. For  $\text{C}_{17}\text{H}_{15}\text{F}_3\text{N}_2\text{O}_3 + \text{Na}$  375.0932, found 375.0928.

## 6.5 Transformation of 3s into 10

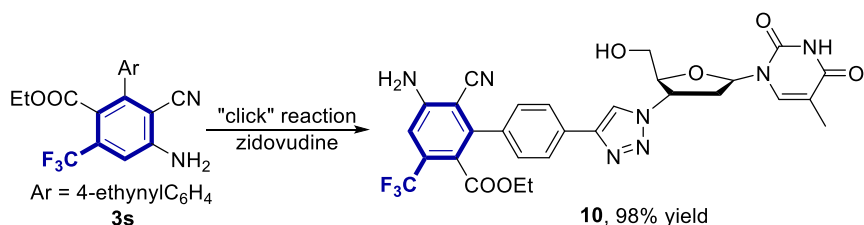

The reaction was carried out with **3s** (0.10 mmol) and zidovudine (0.1 mmol) in THF at rt, and the mixed aqueous solution of freshly prepared  $\text{CuSO}_4 \cdot 5\text{H}_2\text{O}$  (0.1 mmol) and sodium ascorbate (0.1 mmol) was added. The resulting solution was stirred at room temperature for 2 h. Then the reaction mixture was concentrated and the residue was purified by flash chromatography on silica gel (dichloromethane/ methanol = 20:1) to give the desire compound **10**, which was further analyzed by  $^1\text{H}$  NMR,  $^{13}\text{C}$  HMR, HRMS analysis.

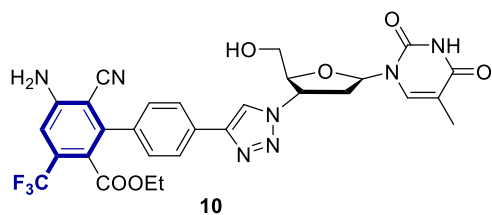

Obtained as a white solid; yield: 98% (61.3 mg) after flash chromatography. mp 130-132 °C,

$^1\text{H}$  NMR (700 MHz,  $(\text{CD}_3)_2\text{SO}$ ):  $\delta$  = 11.38 (s, 1H), 8.88 (s, 1H), 7.97-7.6 (m, 2H), 7.86 (s, 1H), 7.42 (d,  $J$  = 7.7 Hz, 2H), 7.26 (s, 1H), 7.01 (s, 2H), 6.48 (t,  $J$  = 7.0 Hz, 1H), 5.45-5.43 (m,

1H), 5.33 (s, 1H), 4.31 (d,  $J$  = 2.8 Hz, 1H), 3.89 (q,  $J$  = 7.0 Hz, 2H), 3.76 (d,  $J$  = 11.2 Hz, 1H), 3.70 (d,  $J$  = 11.2 Hz, 1H), 2.85-2.82 (m, 1H), 2.75-2.71 (m, 1H), 1.83 (s, 3H), 0.86 (t,  $J$  = 7.0 Hz, 3H) ppm;  $^{13}\text{C}$  NMR (150 MHz,  $\text{CDCl}_3$ ):  $\delta$  = 165.57, 163.80, 152.59, 150.50, 145.95, 145.30, 136.32, 135.79, 131.15, 130.38 (q,  $J_{\text{CF}}$  = 31.7 Hz), 129.38, 125.21, 125.01, 123.65, 121.62, 121.31 (t,  $J_{\text{CF}}$  = 273.0 Hz), 118.30, 115.48, 111.73 (t,  $J_{\text{CF}}$  = 6.0 Hz), 109.70, 96.99, 84.49, 83.96, 61.23, 60.79, 59.49, 37.19, 13.31, 12.31 ppm. ESI HRMS: calcd. For  $\text{C}_{29}\text{H}_{26}\text{F}_3\text{N}_7\text{O}_6 + \text{Na}$  648.1794, found 648.1790.

## 7. X-ray crystal data for 3k, 5g, and Int. E.

### 7.1 Crystal data of 3k

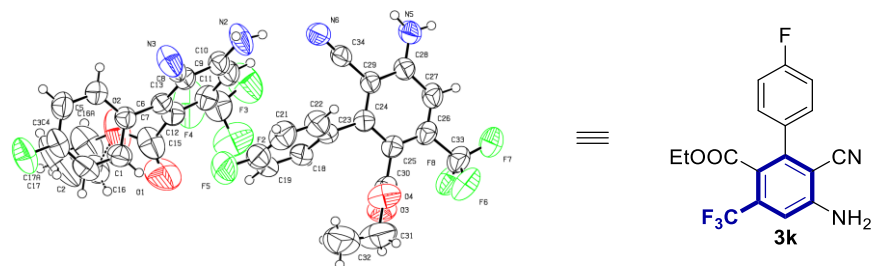

|                                             |                                                                              |
|---------------------------------------------|------------------------------------------------------------------------------|
| Identification code                         | lq-hb-hxh5282                                                                |
| Empirical formula                           | C <sub>17</sub> H <sub>12</sub> F <sub>4</sub> N <sub>2</sub> O <sub>2</sub> |
| Formula weight                              | 352.29                                                                       |
| Temperature/K                               | 295.4(2)                                                                     |
| Crystal system                              | monoclinic                                                                   |
| Space group                                 | P2 <sub>1</sub> /c                                                           |
| a/Å                                         | 12.9910(4)                                                                   |
| b/Å                                         | 17.6471(7)                                                                   |
| c/Å                                         | 14.6986(4)                                                                   |
| α/°                                         | 90                                                                           |
| β/°                                         | 92.642(3)                                                                    |
| γ/°                                         | 90                                                                           |
| Volume/Å <sup>3</sup>                       | 3366.1(2)                                                                    |
| Z                                           | 8                                                                            |
| ρ <sub>calc</sub> /g/cm <sup>3</sup>        | 1.390                                                                        |
| μ/mm <sup>-1</sup>                          | 1.065                                                                        |
| F(000)                                      | 1440.0                                                                       |
| Crystal size/mm <sup>3</sup>                | 0.65 × 0.5 × 0.5                                                             |
| Radiation                                   | CuKα (λ = 1.54184)                                                           |
| 2θ range for data collection/°              | 7.832 to 145.64                                                              |
| Index ranges                                | -15 ≤ h ≤ 15, -21 ≤ k ≤ 13, -16 ≤ l ≤ 17                                     |
| Reflections collected                       | 19165                                                                        |
| Independent reflections                     | 6571 [R <sub>int</sub> = 0.0275, R <sub>sigma</sub> = 0.0238]                |
| Data/restraints/parameters                  | 6571/2/490                                                                   |
| Goodness-of-fit on F <sup>2</sup>           | 1.033                                                                        |
| Final R indexes [I ≥ 2σ (I)]                | R <sub>1</sub> = 0.0837, wR <sub>2</sub> = 0.2211                            |
| Final R indexes [all data]                  | R <sub>1</sub> = 0.1026, wR <sub>2</sub> = 0.2490                            |
| Largest diff. peak/hole / e Å <sup>-3</sup> | 0.31/-0.47                                                                   |

## 7.2 Crystal data of 5g

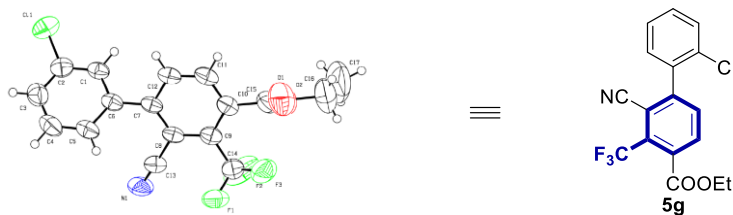

|                                             |                                                                  |
|---------------------------------------------|------------------------------------------------------------------|
| Identification code                         | lq-hb-hxh5281                                                    |
| Empirical formula                           | C <sub>17</sub> H <sub>11</sub> ClF <sub>3</sub> NO <sub>2</sub> |
| Formula weight                              | 353.72                                                           |
| Temperature/K                               | 294.9(2)                                                         |
| Crystal system                              | monoclinic                                                       |
| Space group                                 | P2 <sub>1</sub> /c                                               |
| a/Å                                         | 16.0338(9)                                                       |
| b/Å                                         | 8.0122(3)                                                        |
| c/Å                                         | 13.9749(7)                                                       |
| α/°                                         | 90                                                               |
| β/°                                         | 113.762(6)                                                       |
| γ/°                                         | 90                                                               |
| Volume/Å <sup>3</sup>                       | 1643.10(16)                                                      |
| Z                                           | 4                                                                |
| ρ <sub>calc</sub> /cm <sup>3</sup>          | 1.430                                                            |
| μ/mm <sup>-1</sup>                          | 2.447                                                            |
| F(000)                                      | 720.0                                                            |
| Crystal size/mm <sup>3</sup>                | 0.6 × 0.5 × 0.3                                                  |
| Radiation                                   | CuKα (λ = 1.54184)                                               |
| 2θ range for data collection/°              | 12.062 to 145.536                                                |
| Index ranges                                | -19 ≤ h ≤ 14, -9 ≤ k ≤ 9, -17 ≤ l ≤ 17                           |
| Reflections collected                       | 7459                                                             |
| Independent reflections                     | 3219 [R <sub>int</sub> = 0.0250, R <sub>sigma</sub> = 0.0260]    |
| Data/restraints/parameters                  | 3219/0/218                                                       |
| Goodness-of-fit on F <sup>2</sup>           | 1.039                                                            |
| Final R indexes [I ≥ 2σ (I)]                | R <sub>1</sub> = 0.0798, wR <sub>2</sub> = 0.2008                |
| Final R indexes [all data]                  | R <sub>1</sub> = 0.0886, wR <sub>2</sub> = 0.2181                |
| Largest diff. peak/hole / e Å <sup>-3</sup> | 0.37/-0.49                                                       |

### 7.3 Crystal data of Int. E

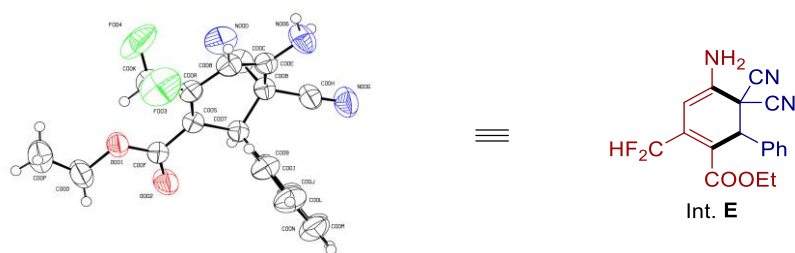

|                                             |                                                                              |
|---------------------------------------------|------------------------------------------------------------------------------|
| Identification code                         | exp_6079                                                                     |
| Empirical formula                           | C <sub>18</sub> H <sub>15</sub> F <sub>2</sub> N <sub>3</sub> O <sub>2</sub> |
| Formula weight                              | 343.33                                                                       |
| Temperature/K                               | 293.6(3)                                                                     |
| Crystal system                              | monoclinic                                                                   |
| Space group                                 | P2 <sub>1</sub> /c                                                           |
| a/Å                                         | 10.2758(5)                                                                   |
| b/Å                                         | 13.9418(6)                                                                   |
| c/Å                                         | 13.1480(6)                                                                   |
| α/°                                         | 90                                                                           |
| β/°                                         | 111.386(6)                                                                   |
| γ/°                                         | 90                                                                           |
| Volume/Å <sup>3</sup>                       | 1753.92(16)                                                                  |
| Z                                           | 4                                                                            |
| ρ <sub>calc</sub> /cm <sup>3</sup>          | 1.300                                                                        |
| μ/mm <sup>-1</sup>                          | 0.855                                                                        |
| F(000)                                      | 712.0                                                                        |
| Crystal size/mm <sup>3</sup>                | 0.7 × 0.6 × 0.5                                                              |
| Radiation                                   | CuKα (λ = 1.54184)                                                           |
| 2θ range for data collection/°              | 9.242 to 143.038                                                             |
| Index ranges                                | -12 ≤ h ≤ 12, -16 ≤ k ≤ 17, -15 ≤ l ≤ 16                                     |
| Reflections collected                       | 9507                                                                         |
| Independent reflections                     | 3373 [R <sub>int</sub> = 0.0345, R <sub>sigma</sub> = 0.0295]                |
| Data/restraints/parameters                  | 3373/0/228                                                                   |
| Goodness-of-fit on F <sup>2</sup>           | 1.038                                                                        |
| Final R indexes [I ≥ 2σ (I)]                | R <sub>1</sub> = 0.0896, wR <sub>2</sub> = 0.2433                            |
| Final R indexes [all data]                  | R <sub>1</sub> = 0.1001, wR <sub>2</sub> = 0.2612                            |
| Largest diff. peak/hole / e Å <sup>-3</sup> | 0.53/-0.47                                                                   |



## 8. NMR spectra

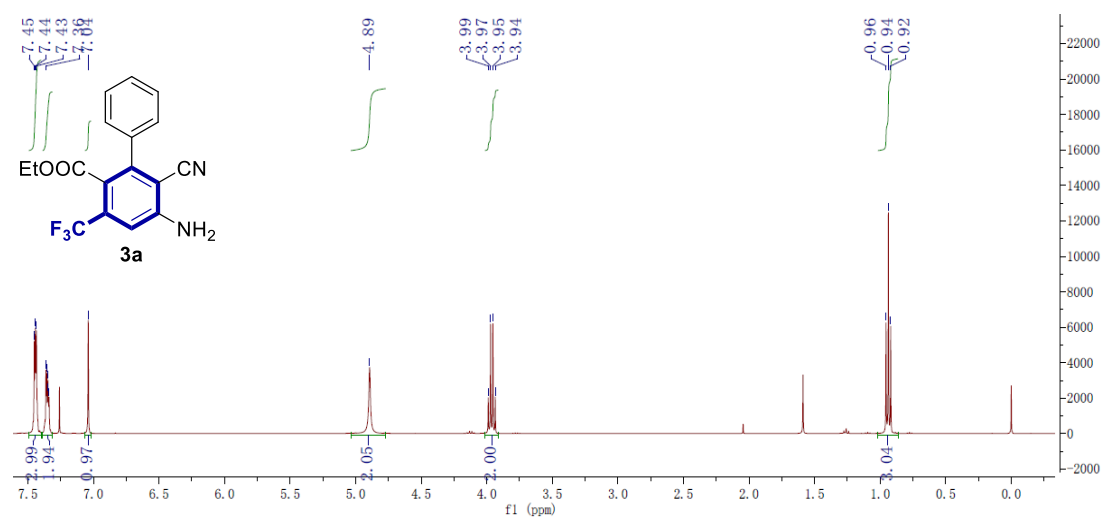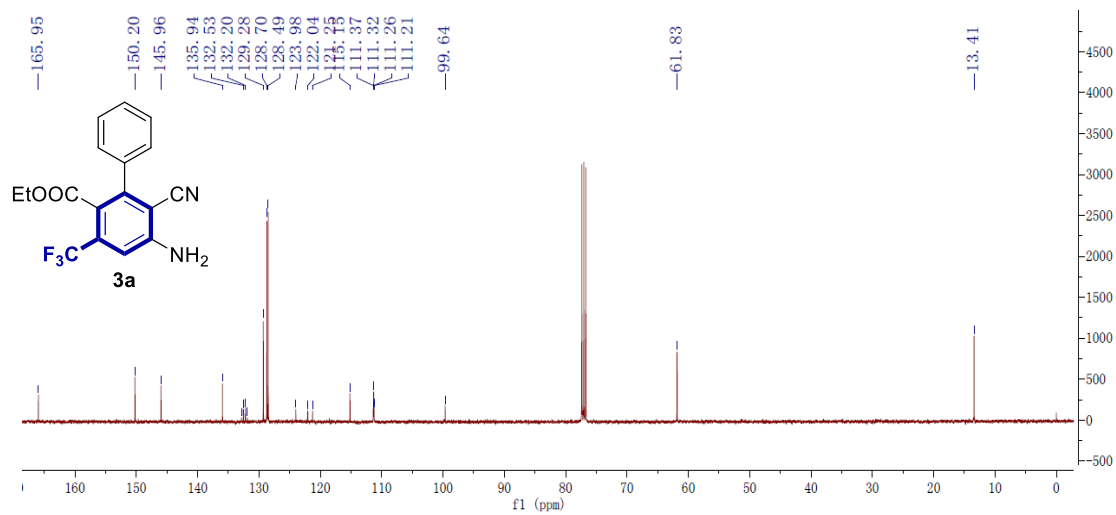

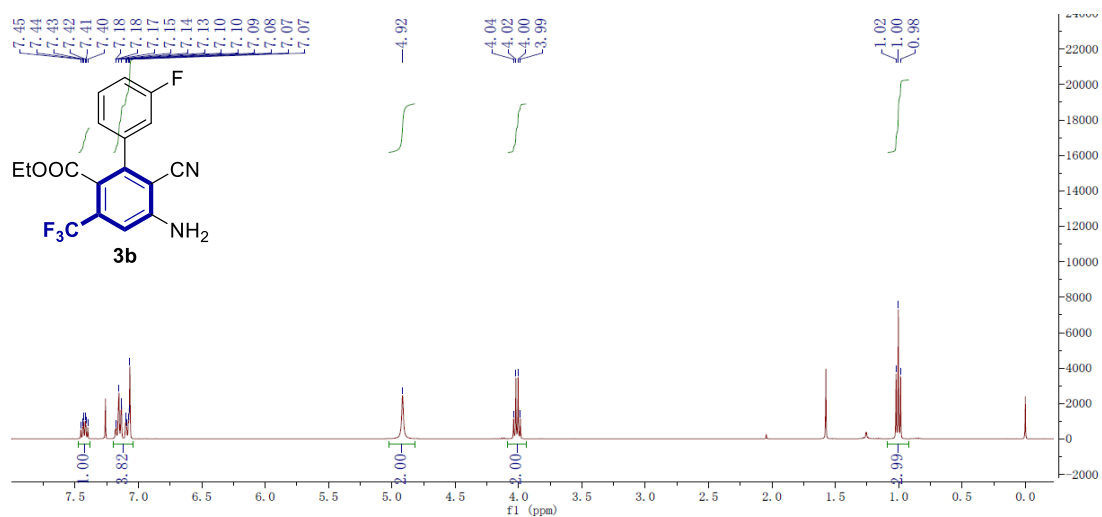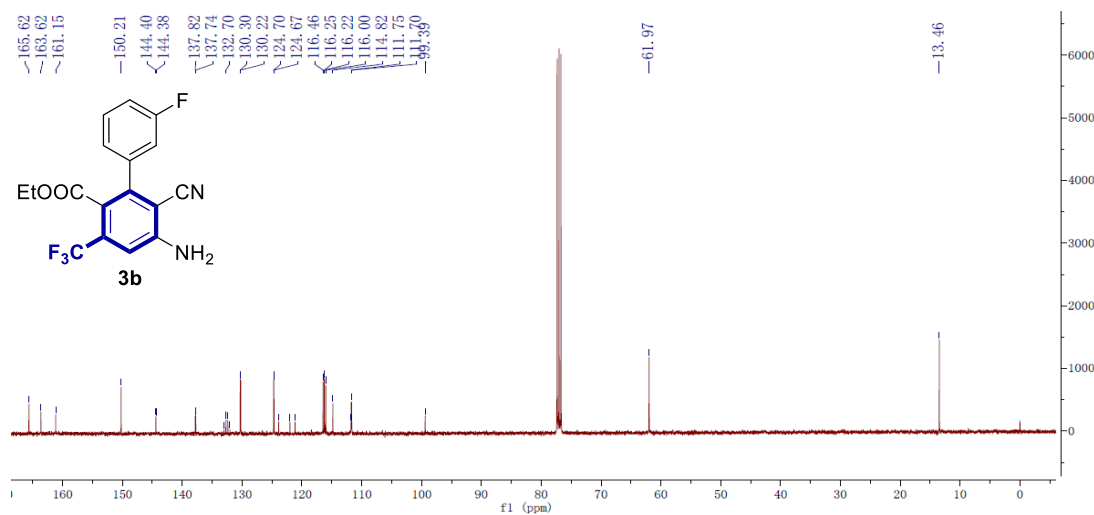

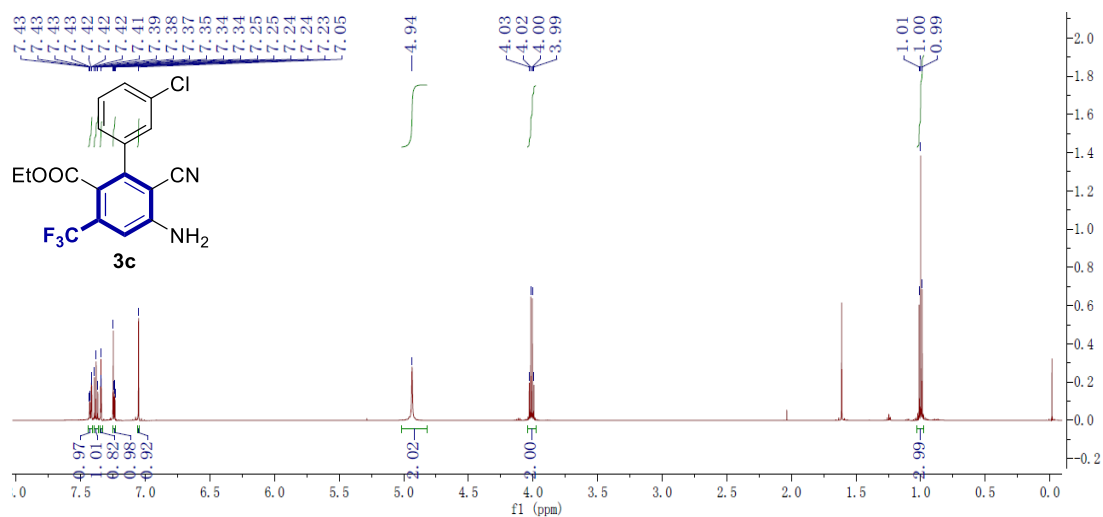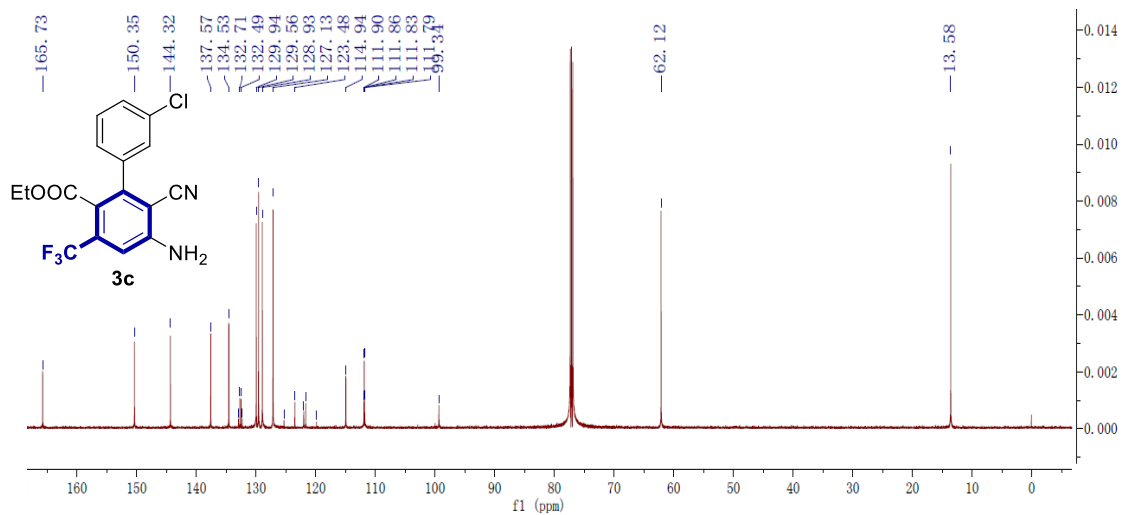

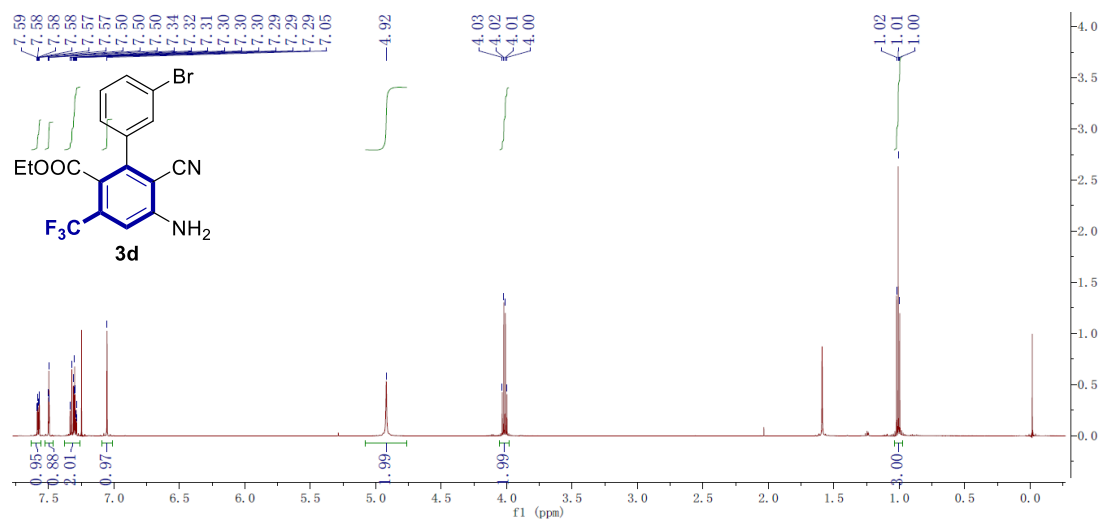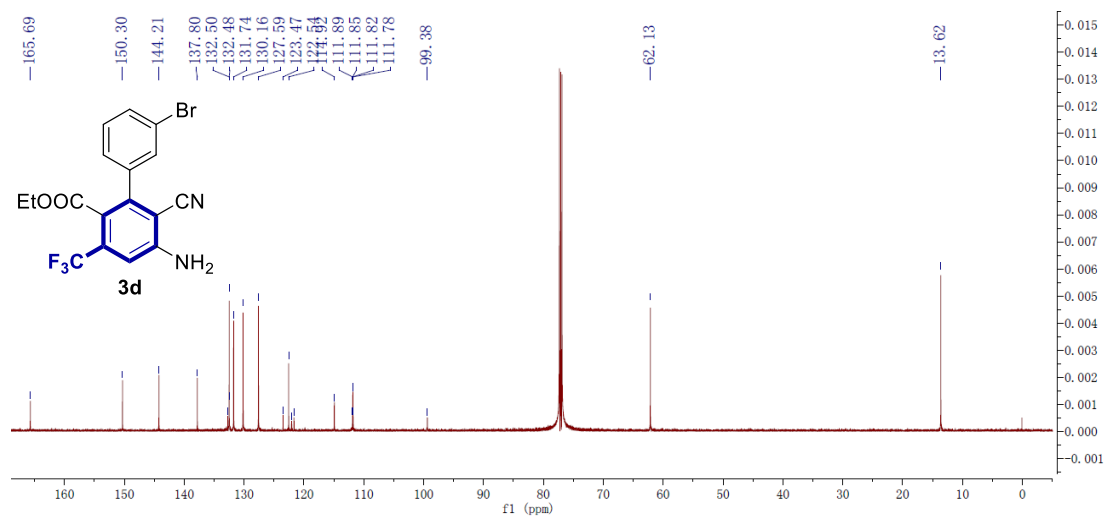

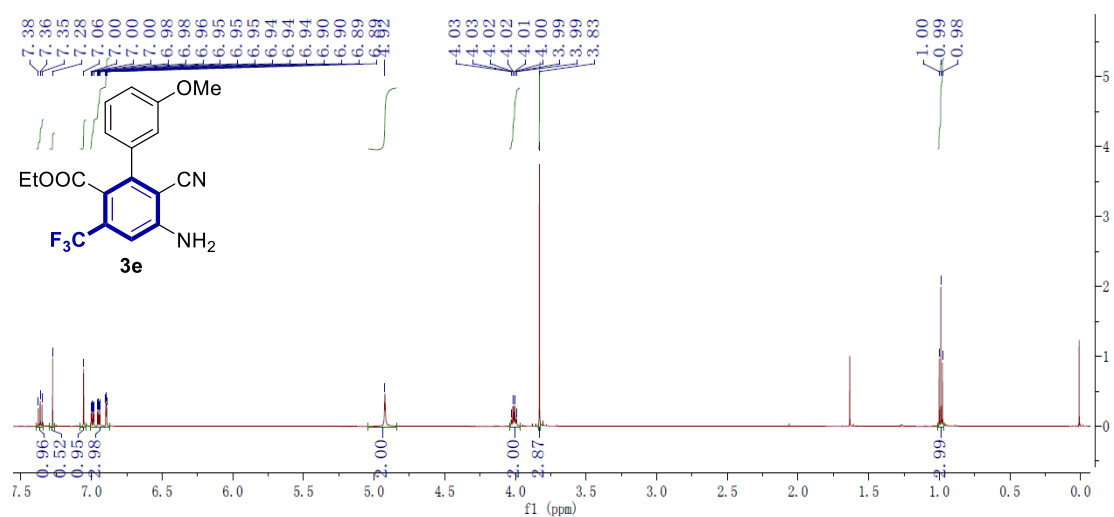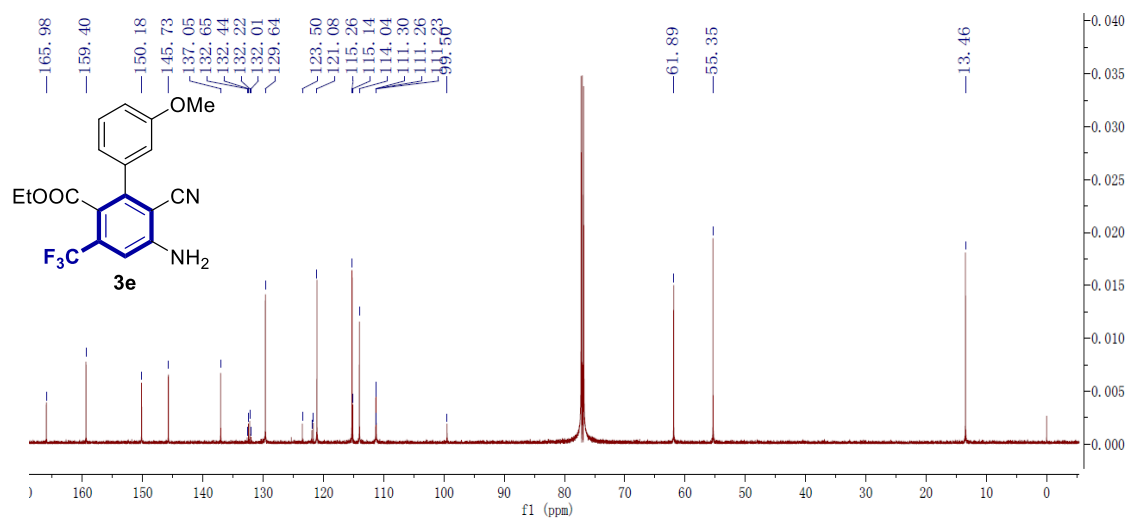

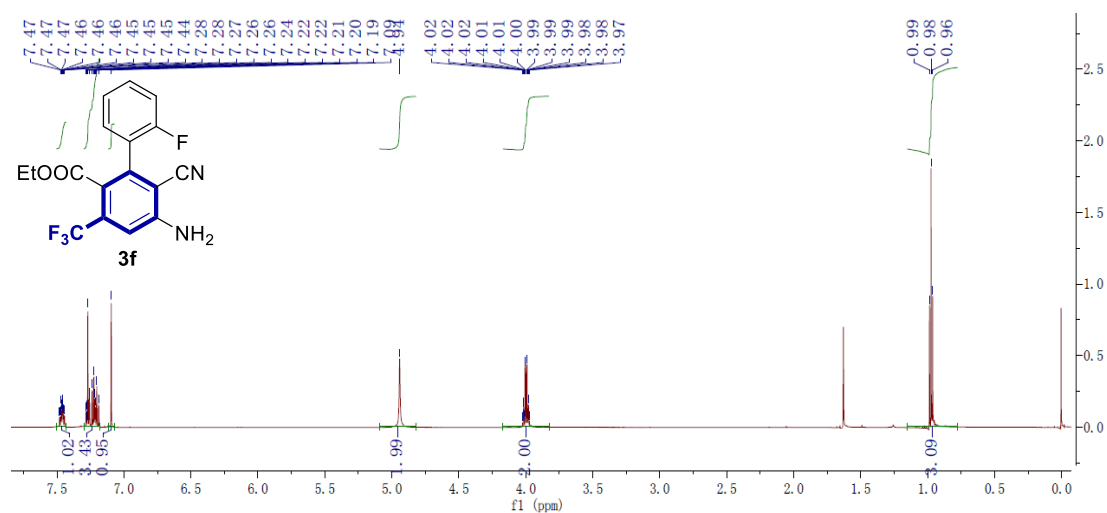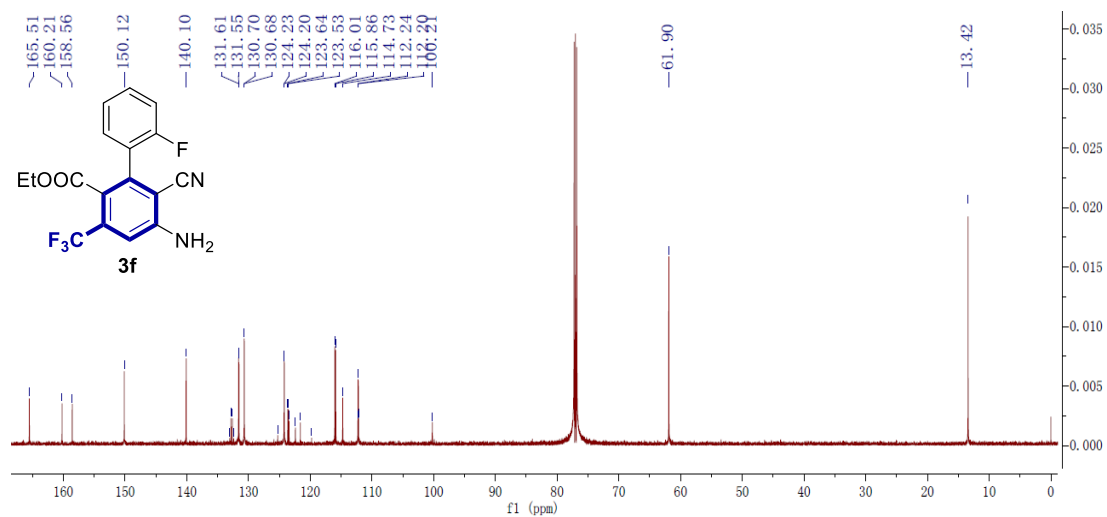

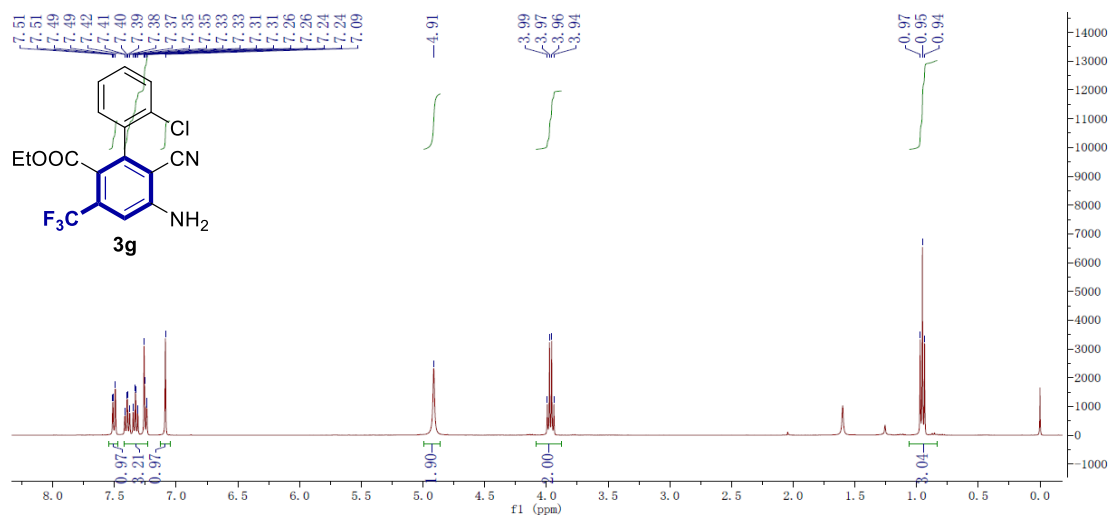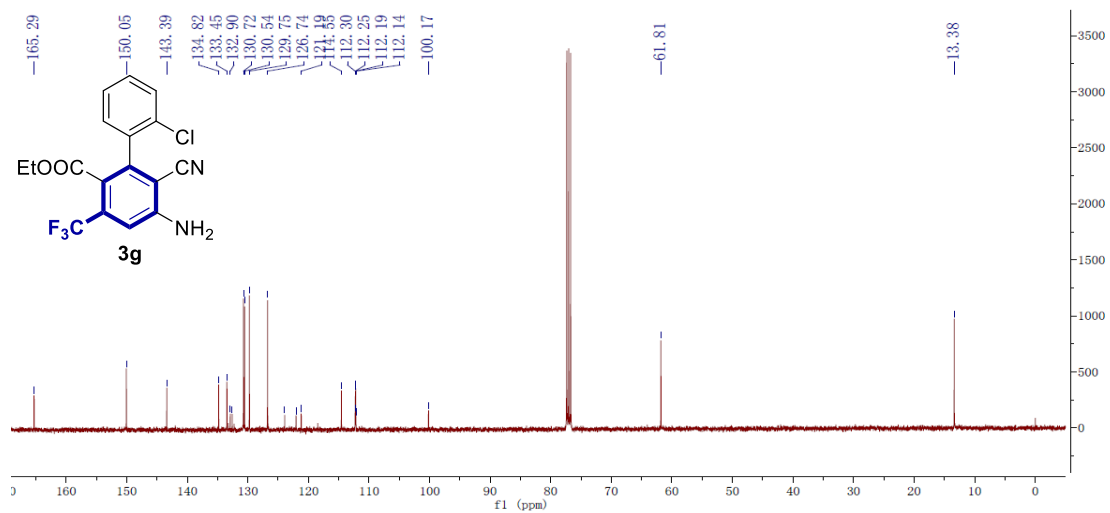

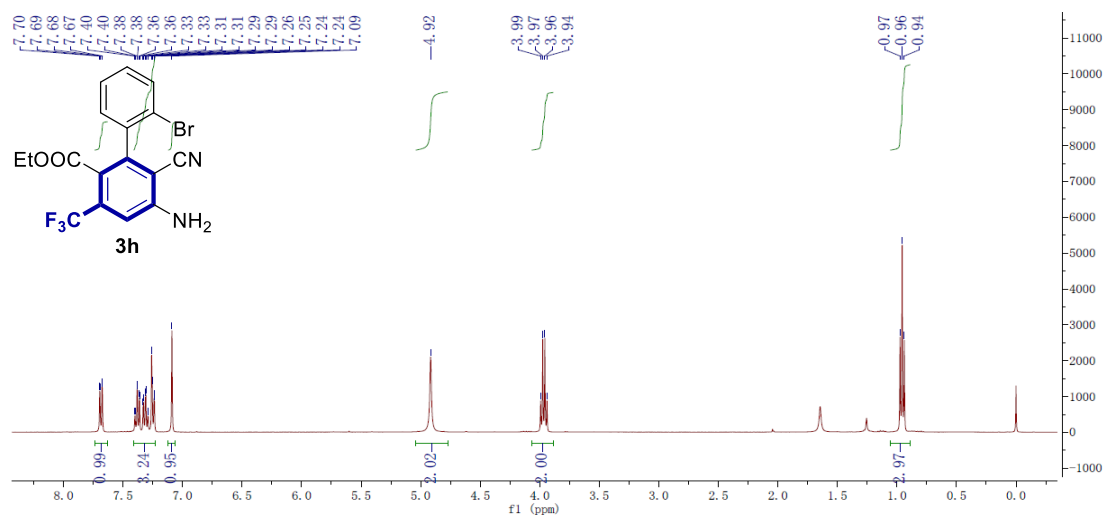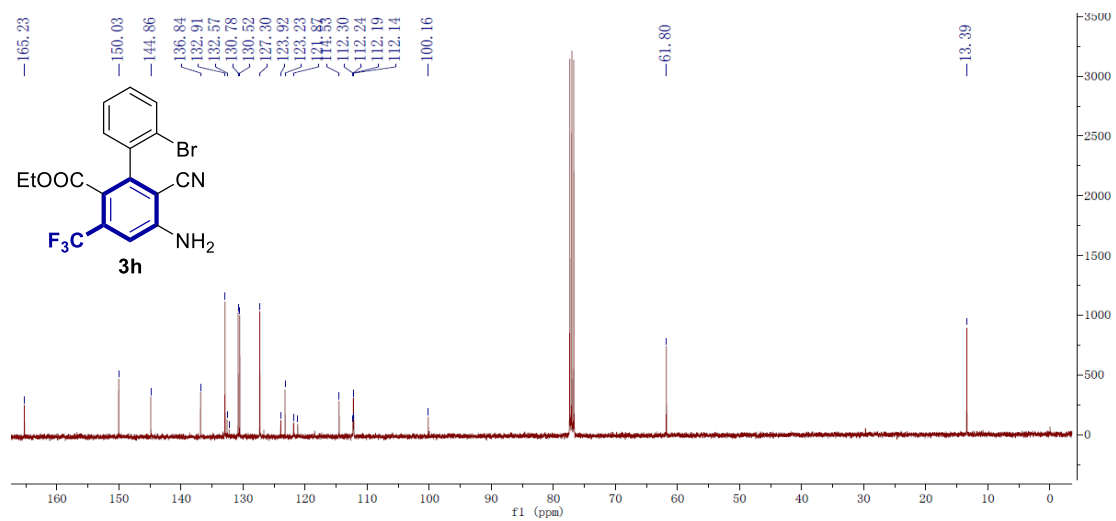



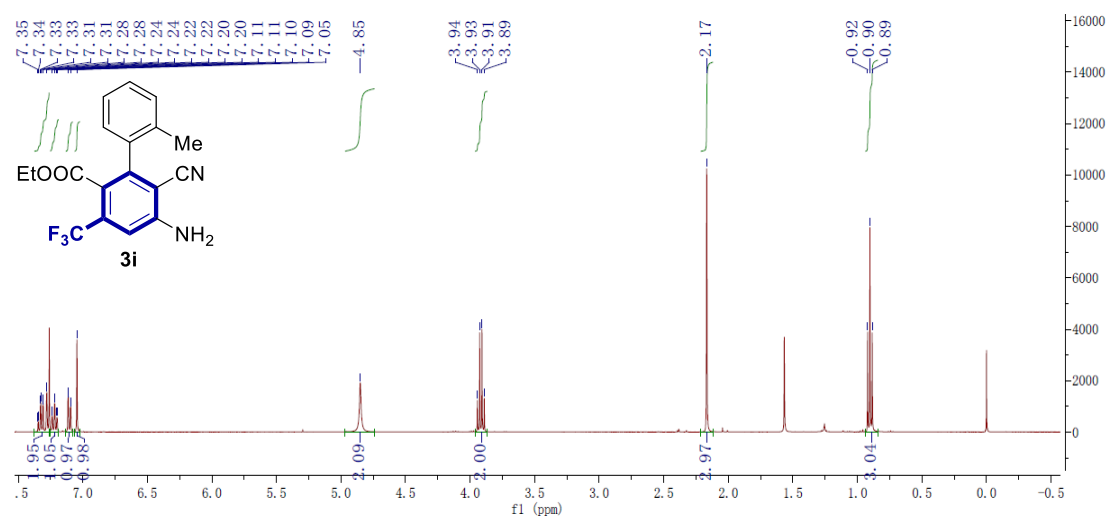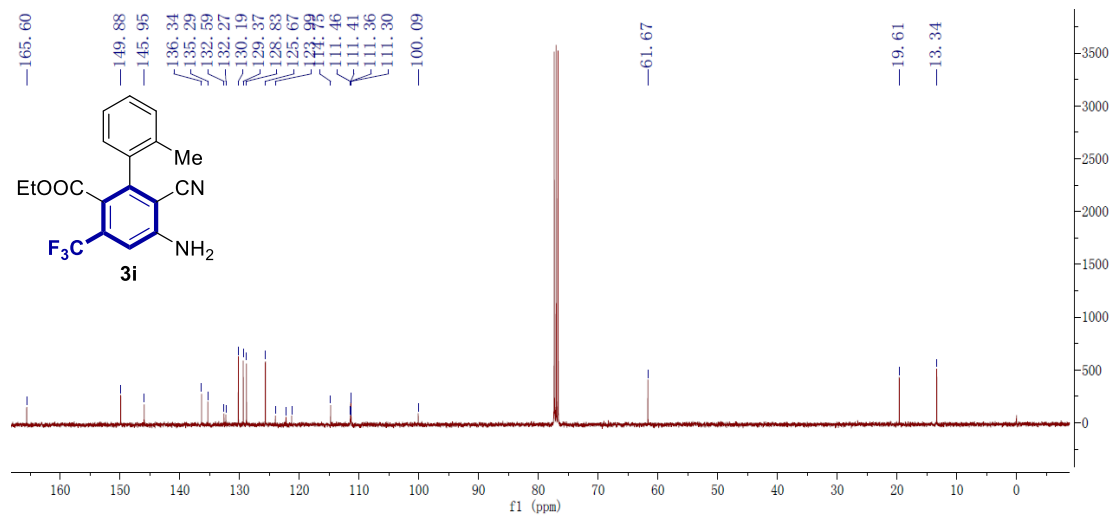

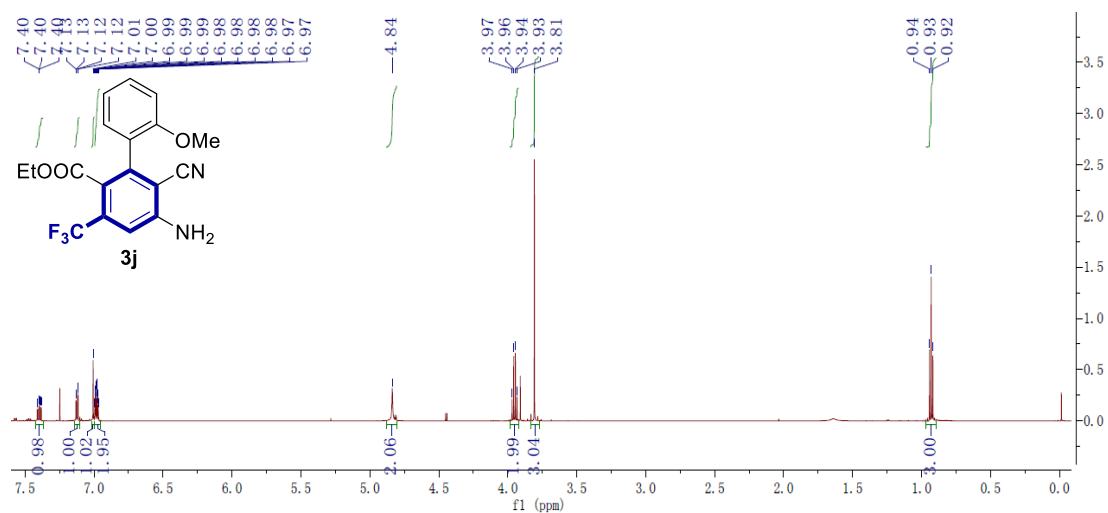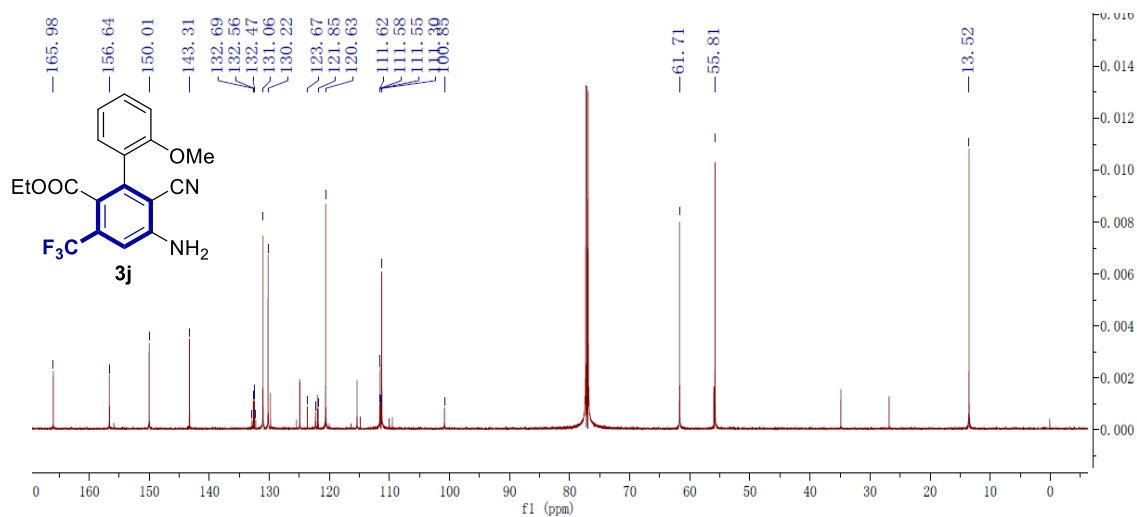

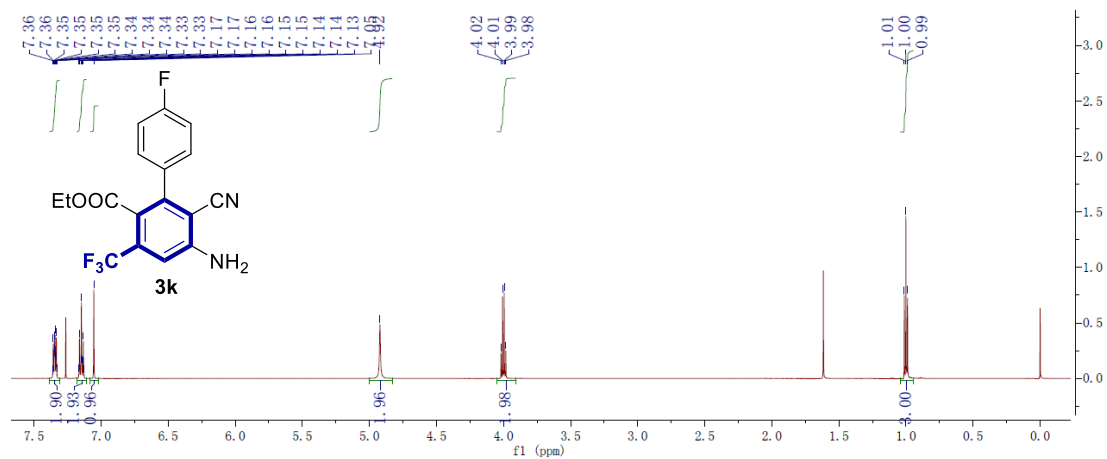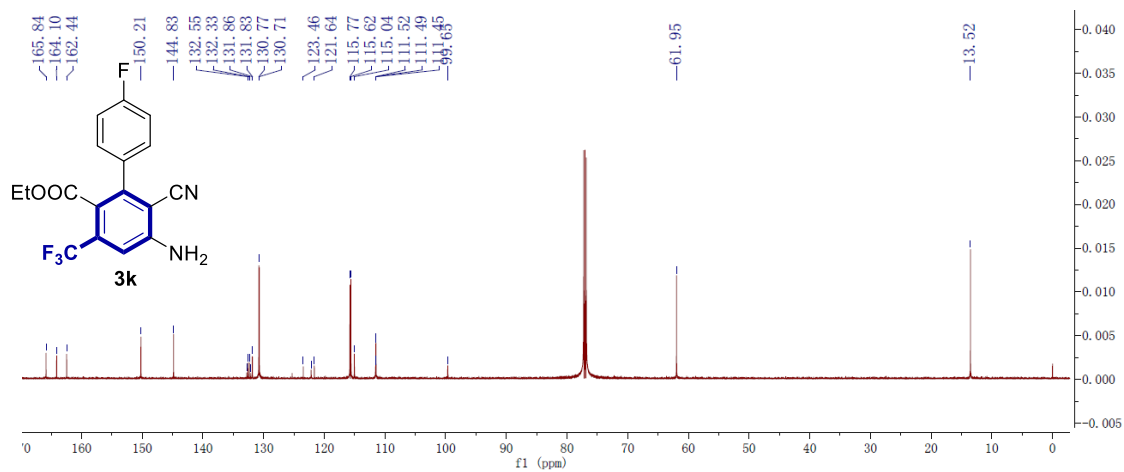

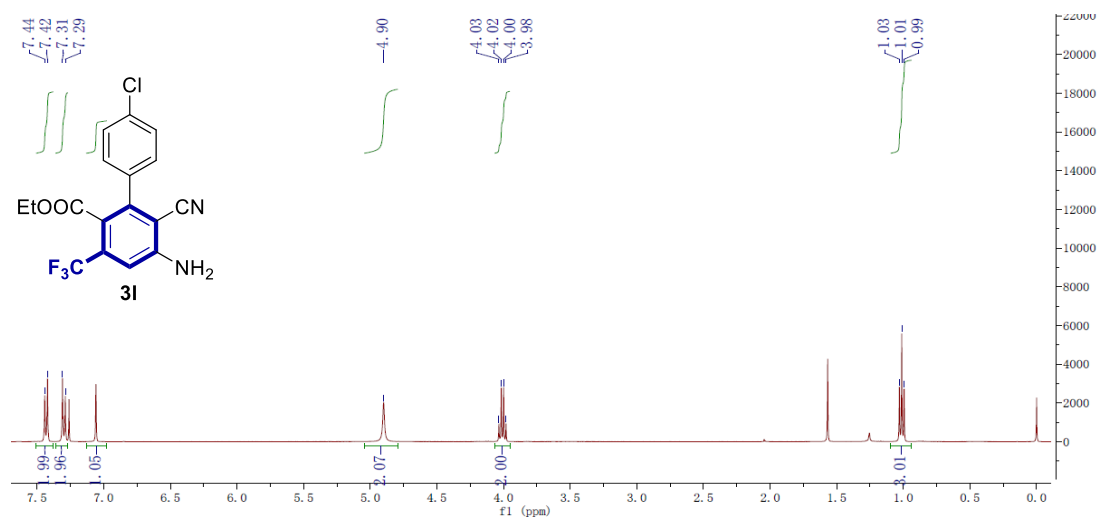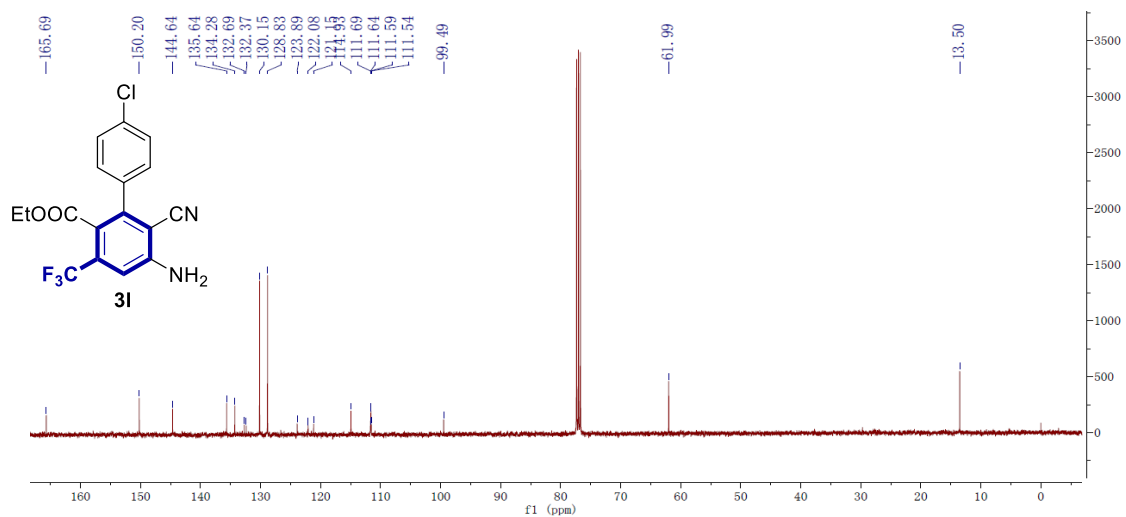

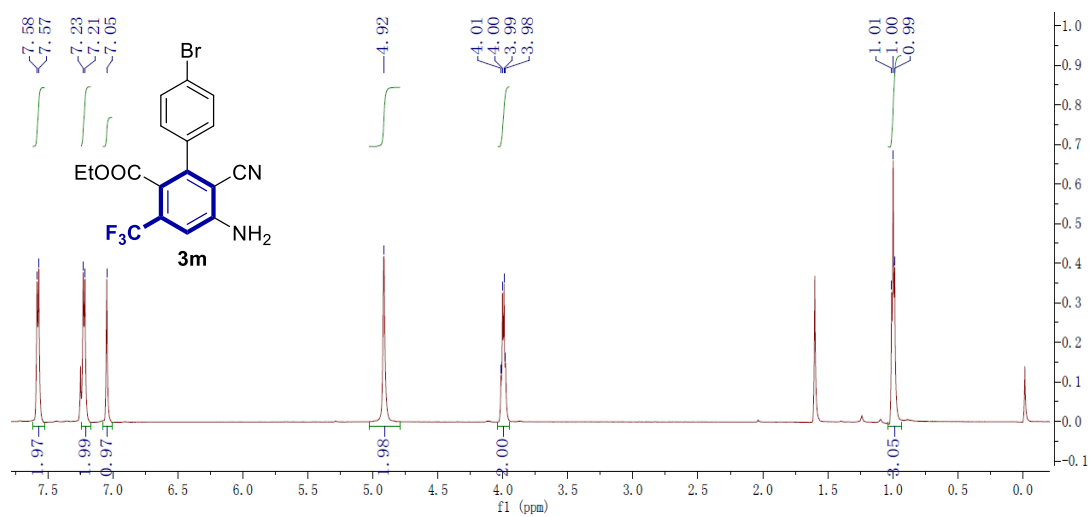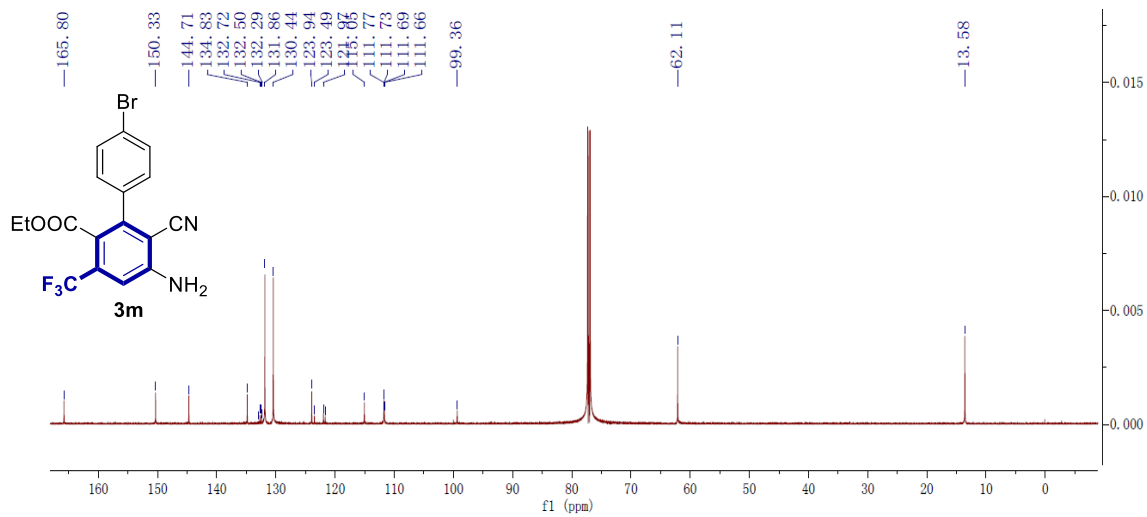

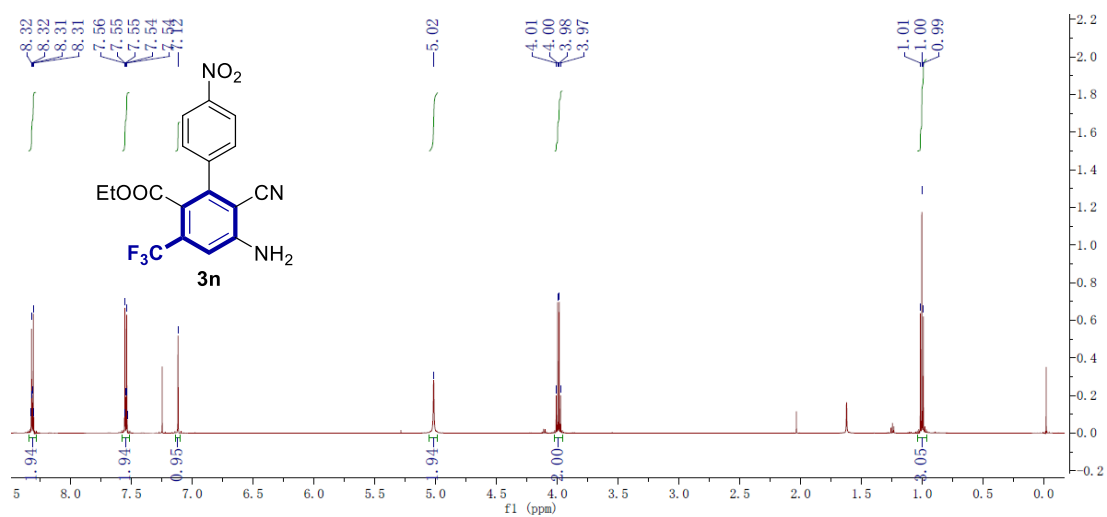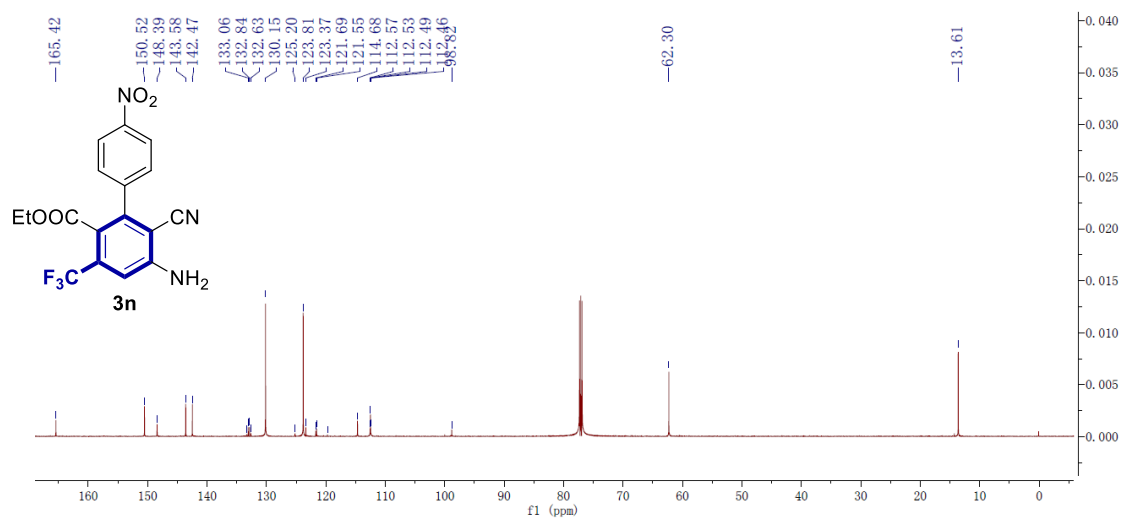

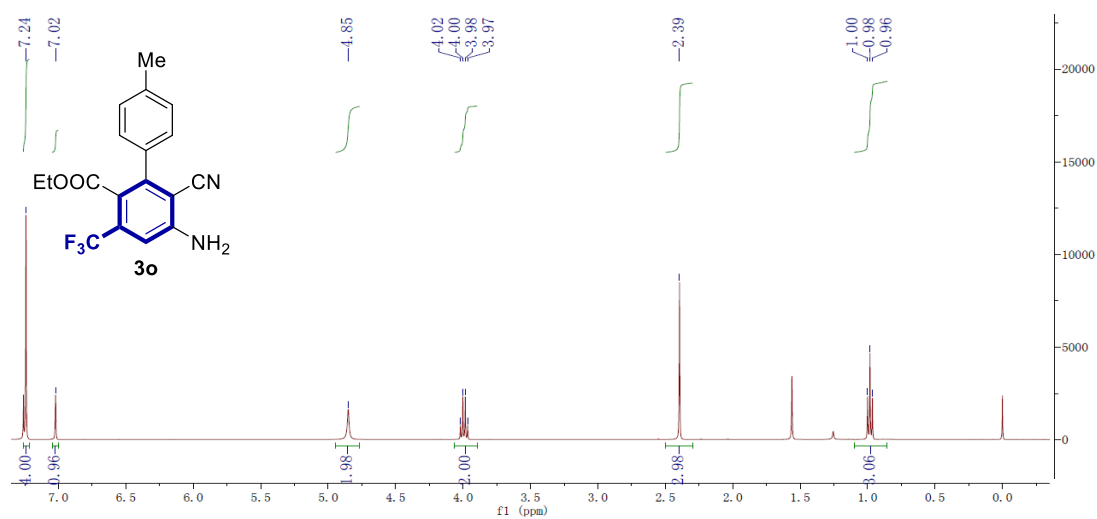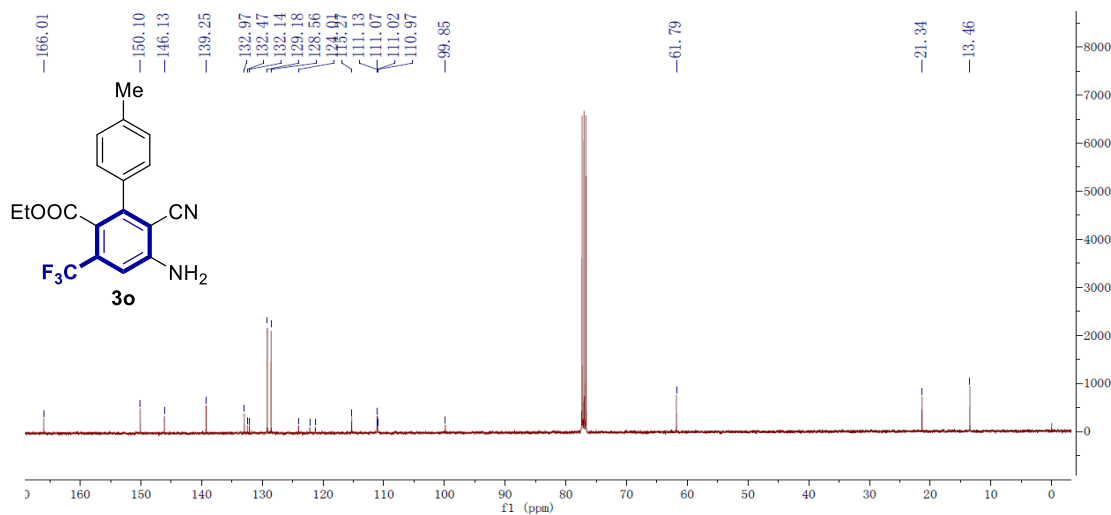

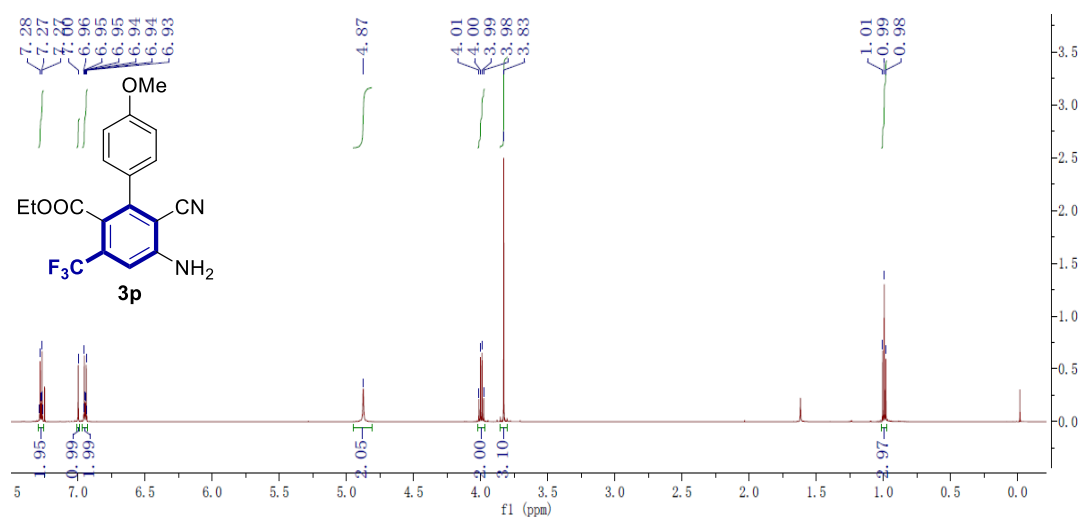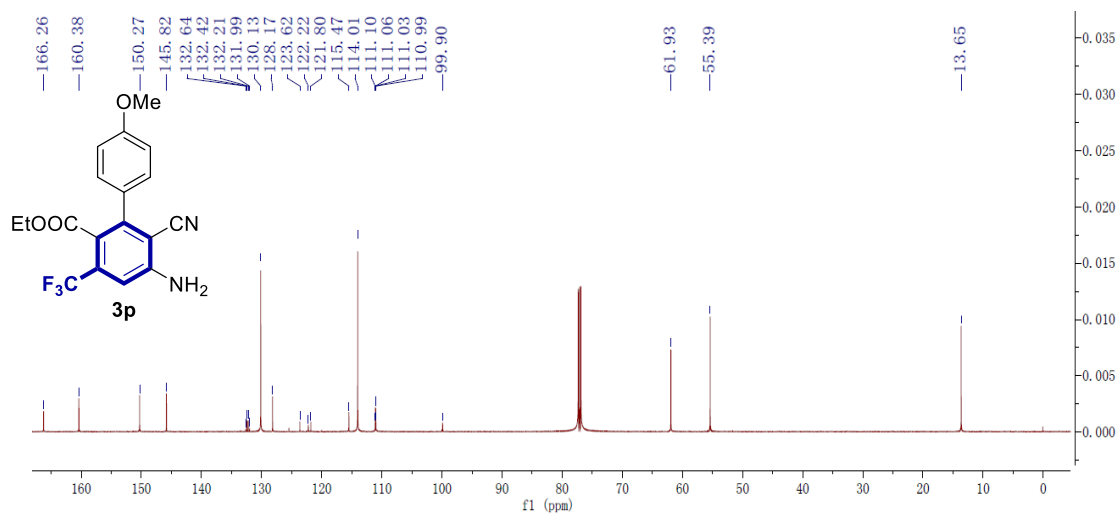



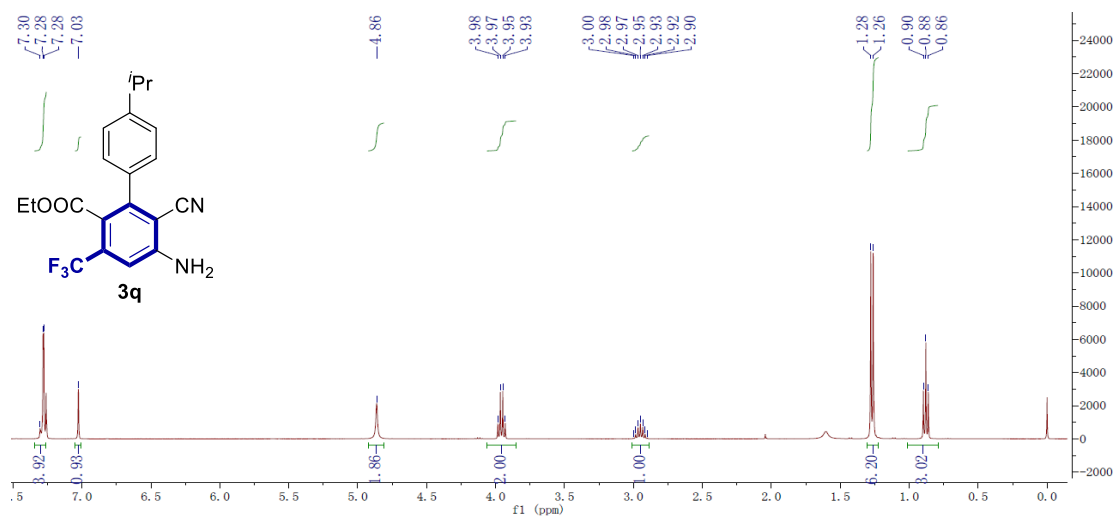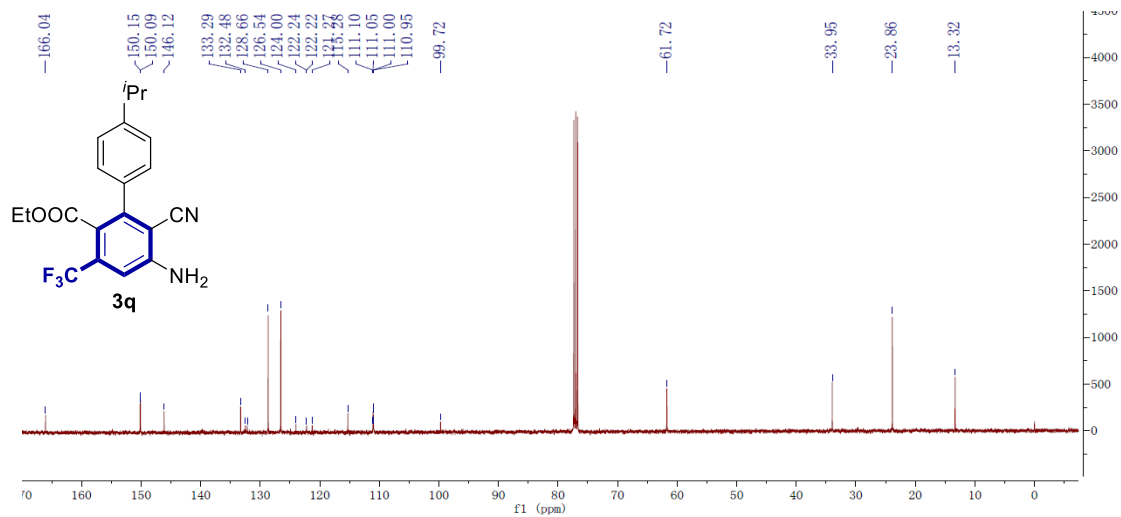

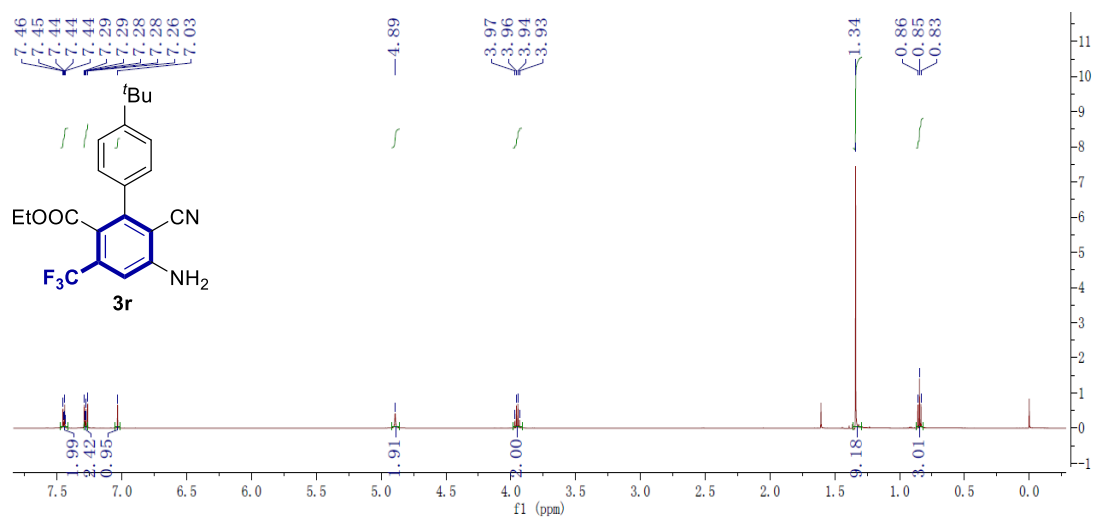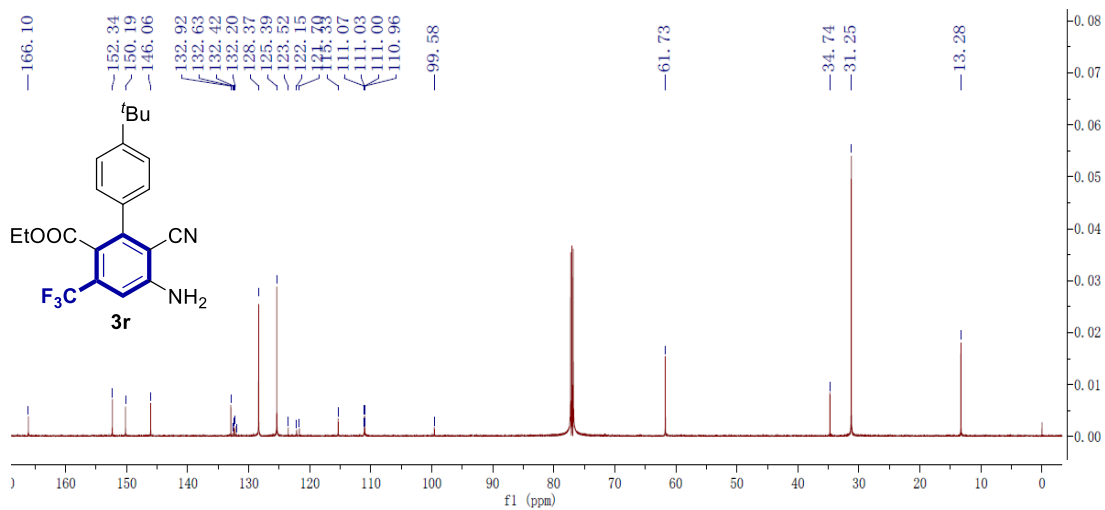

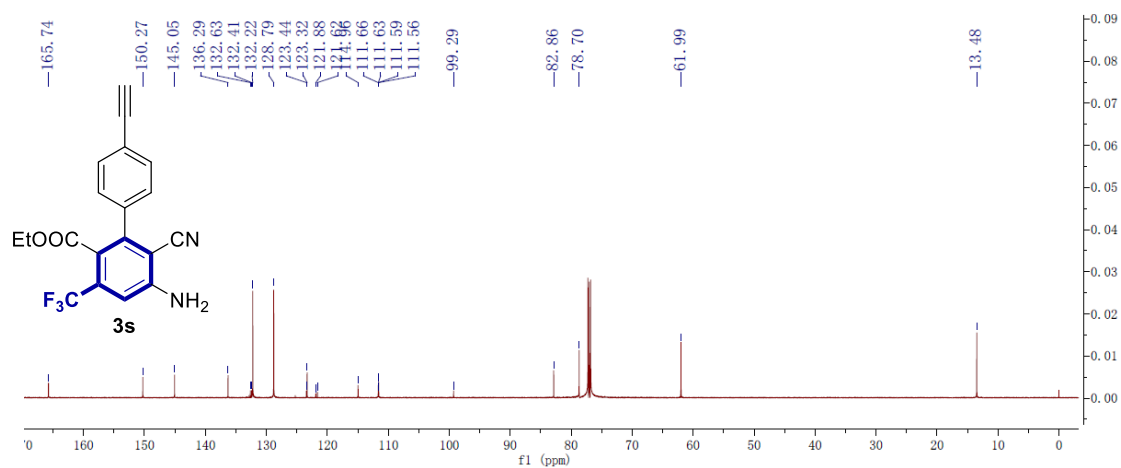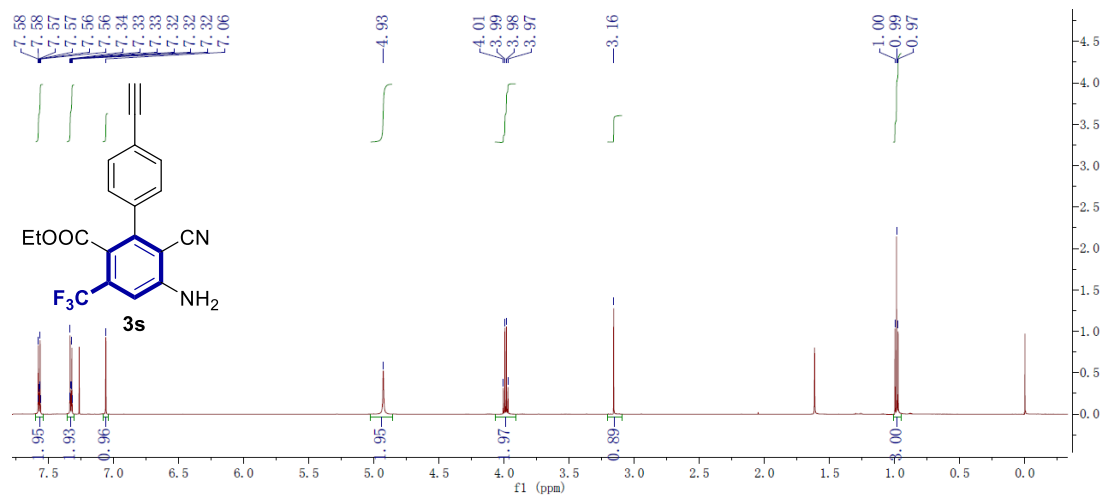

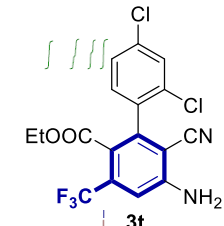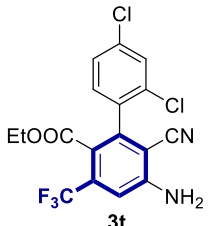

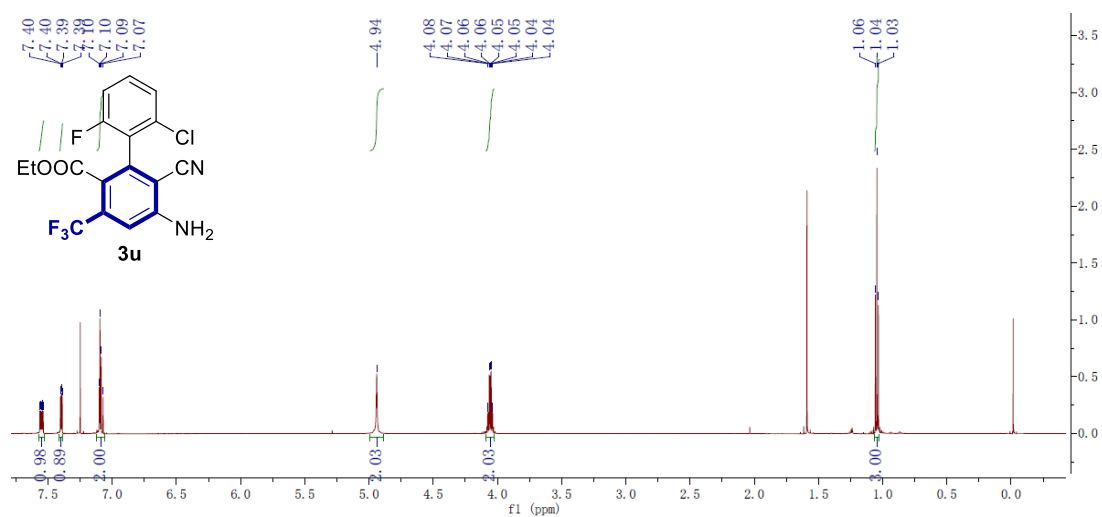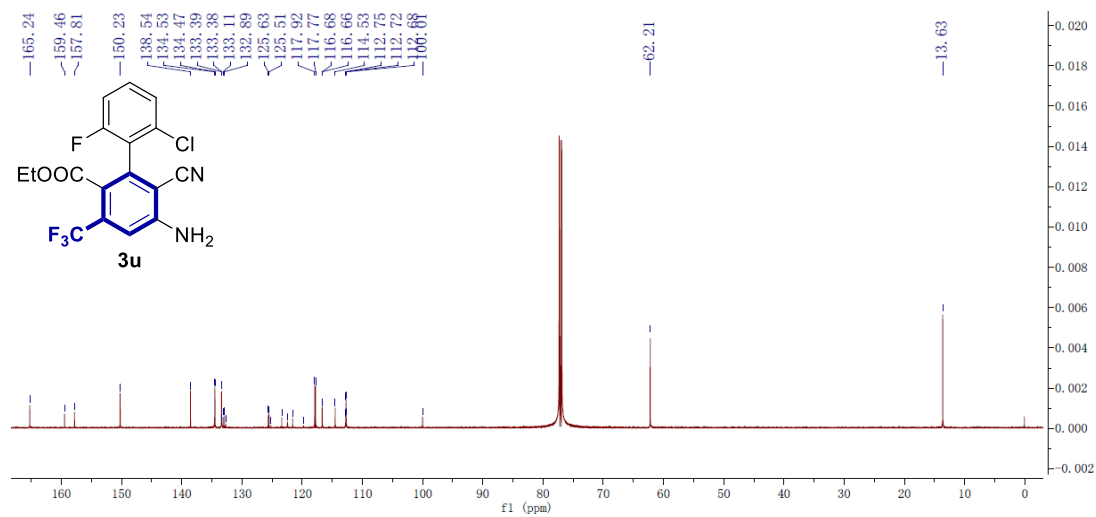

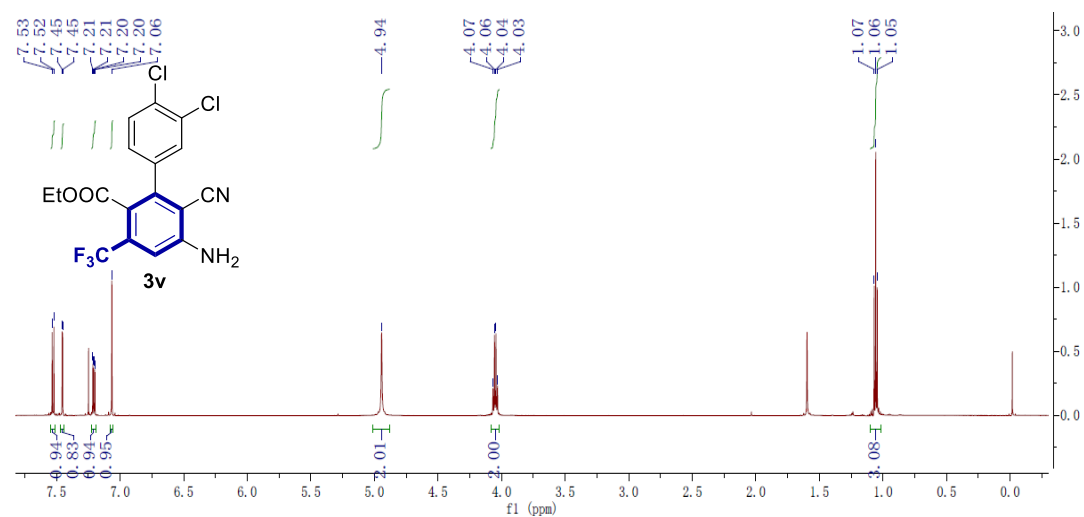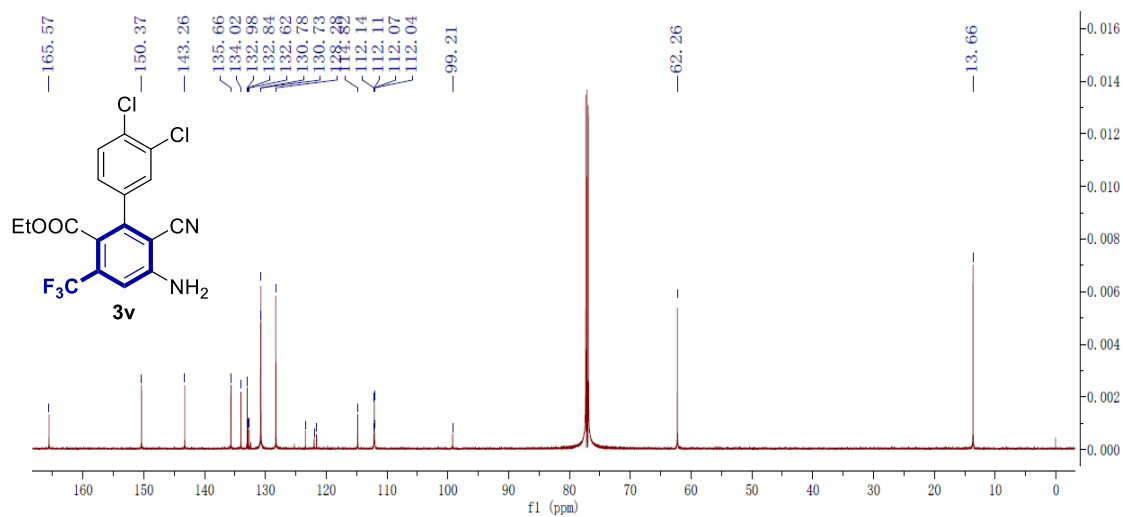

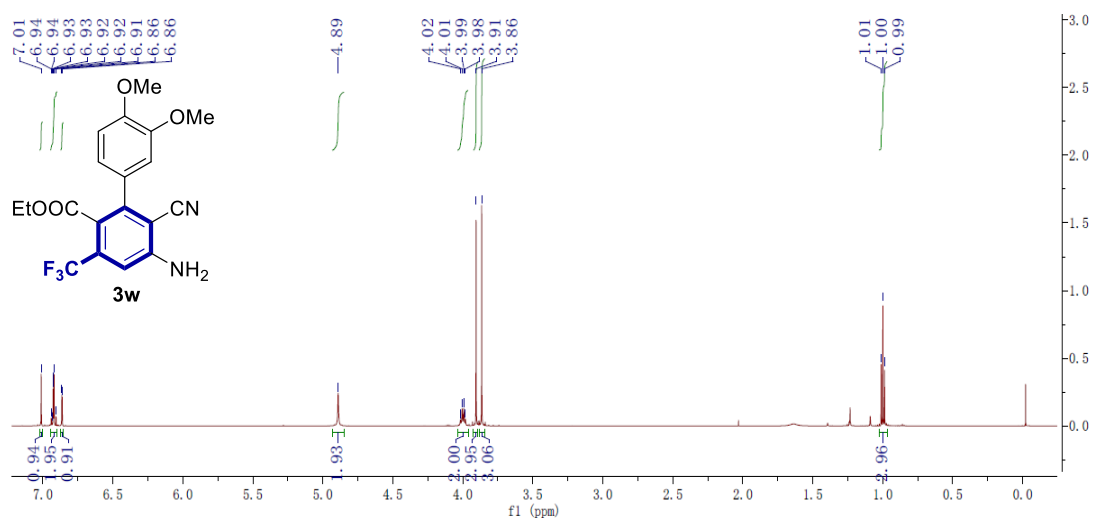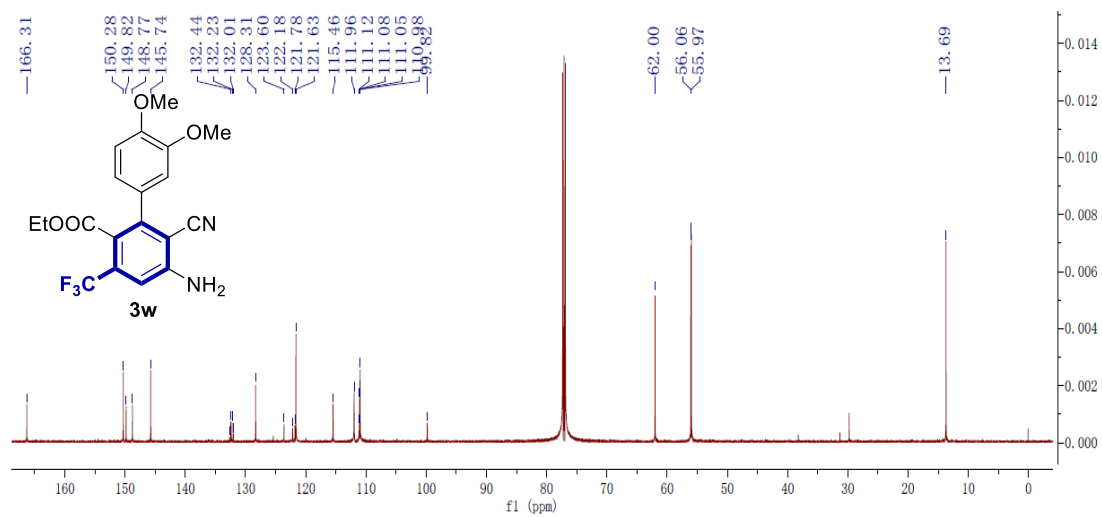

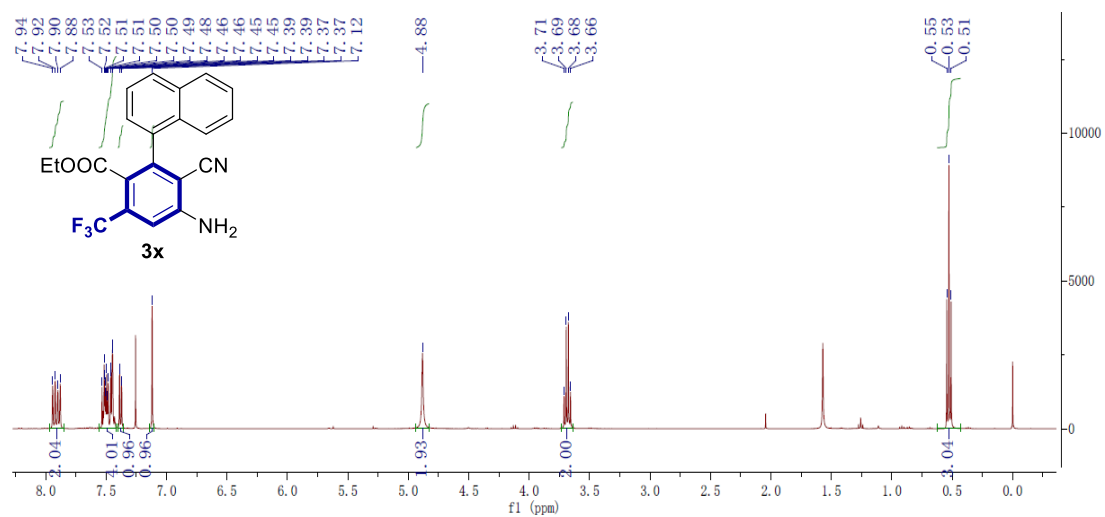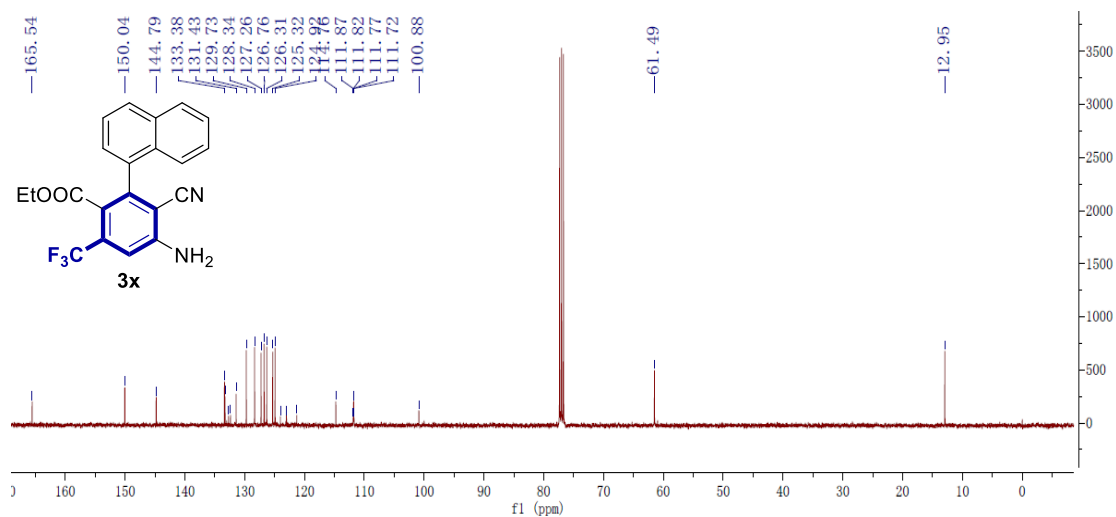



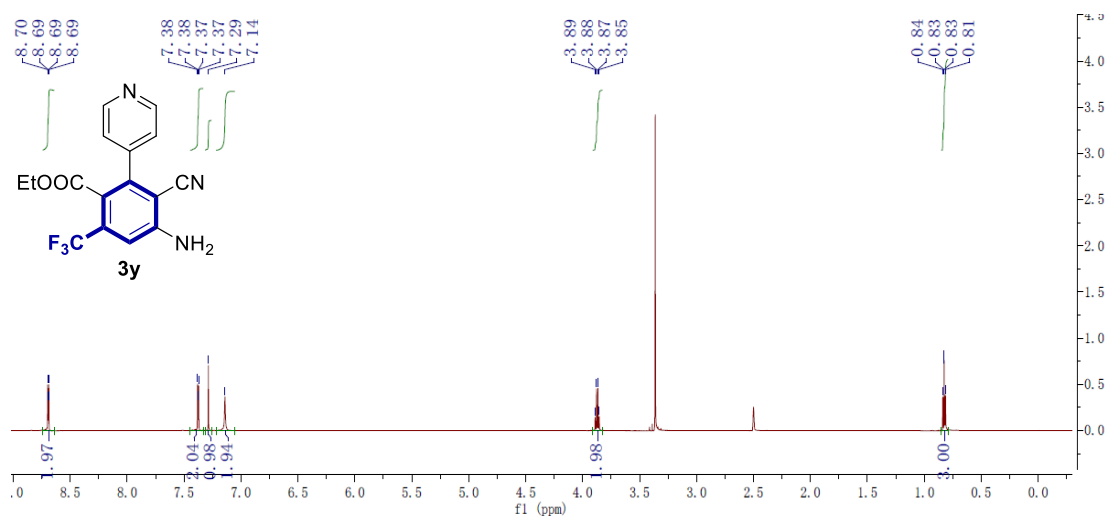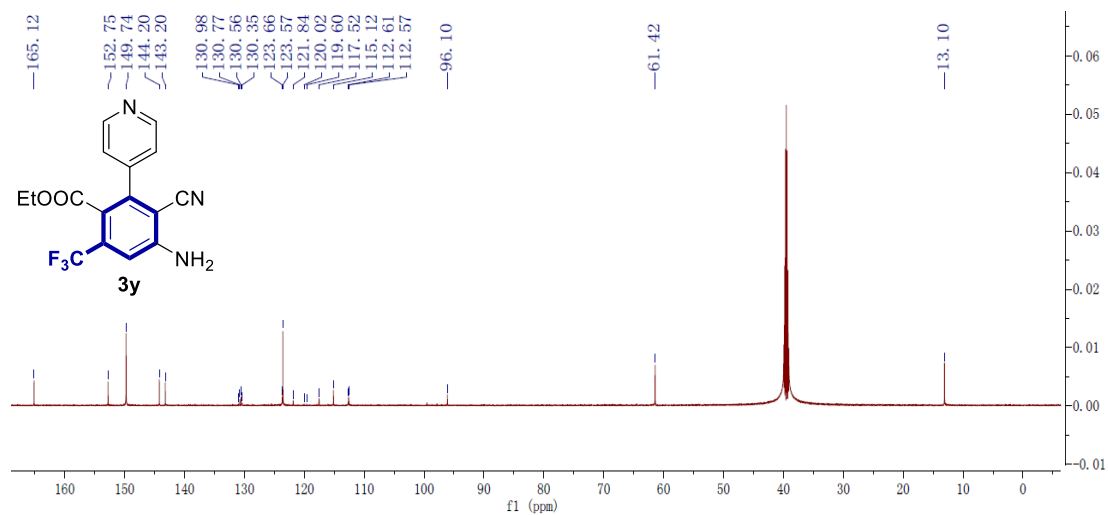

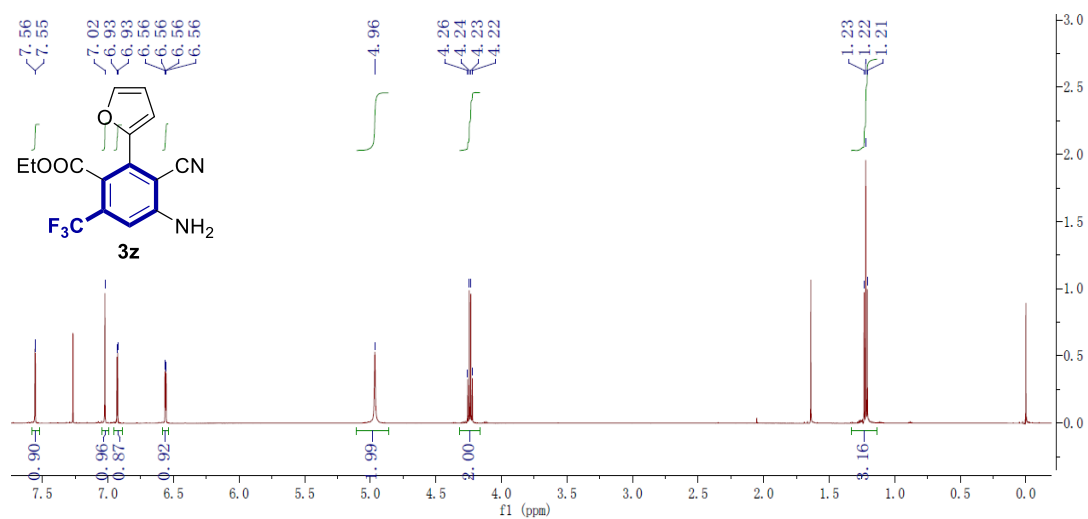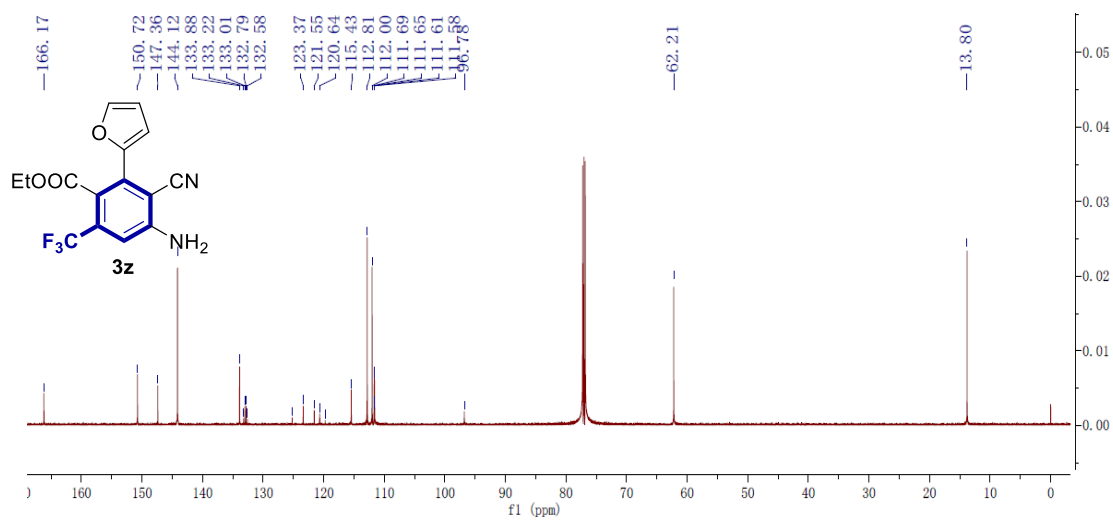

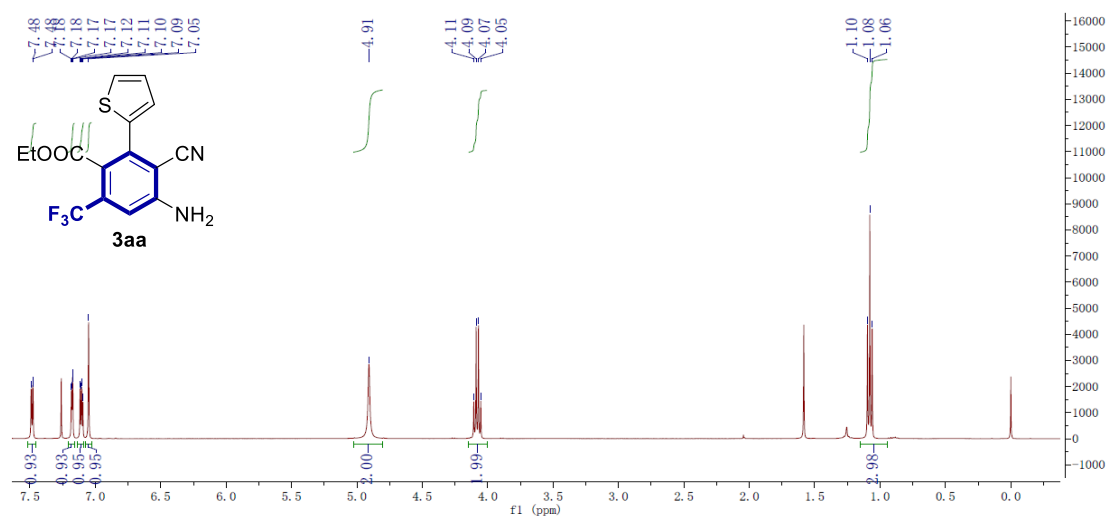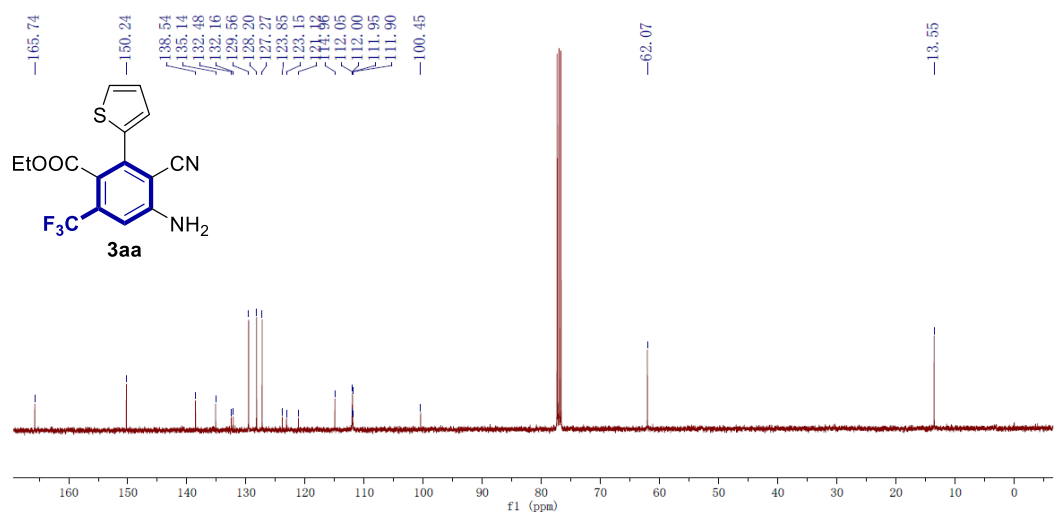

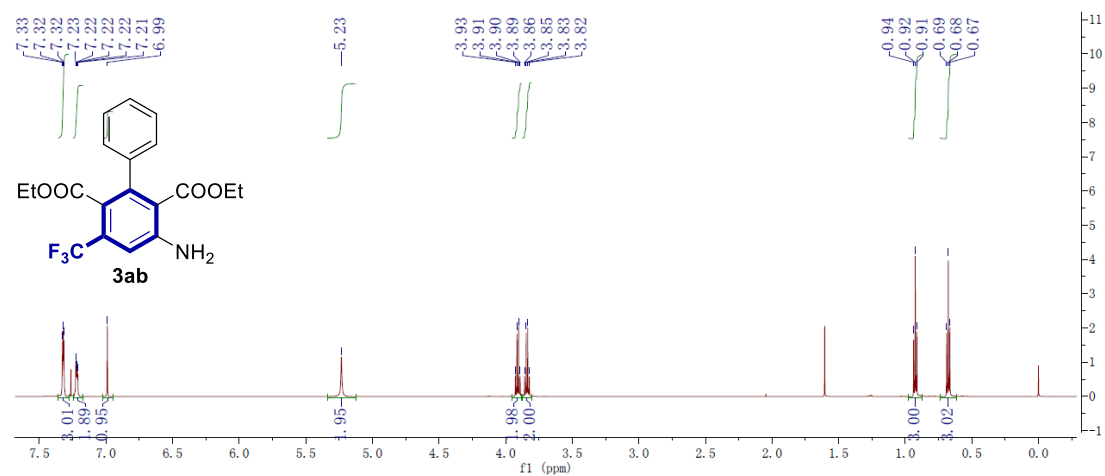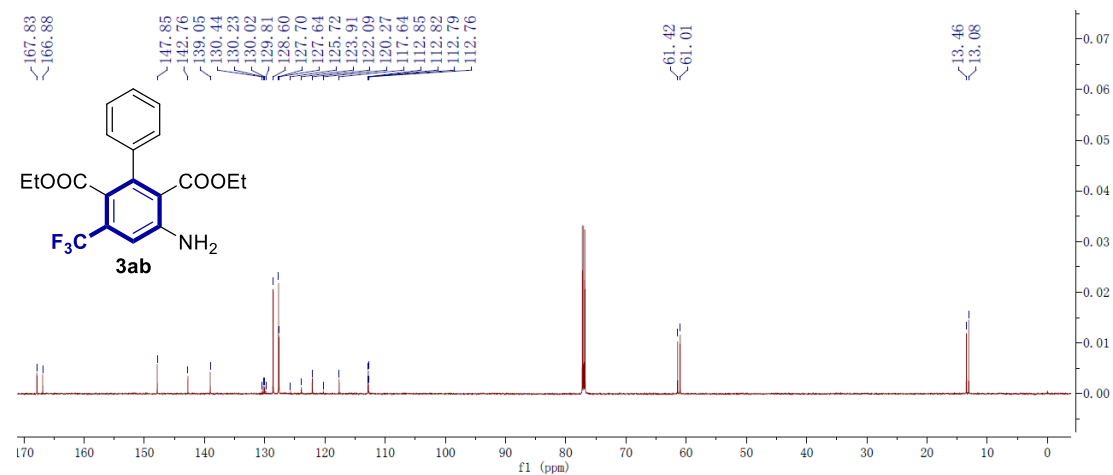

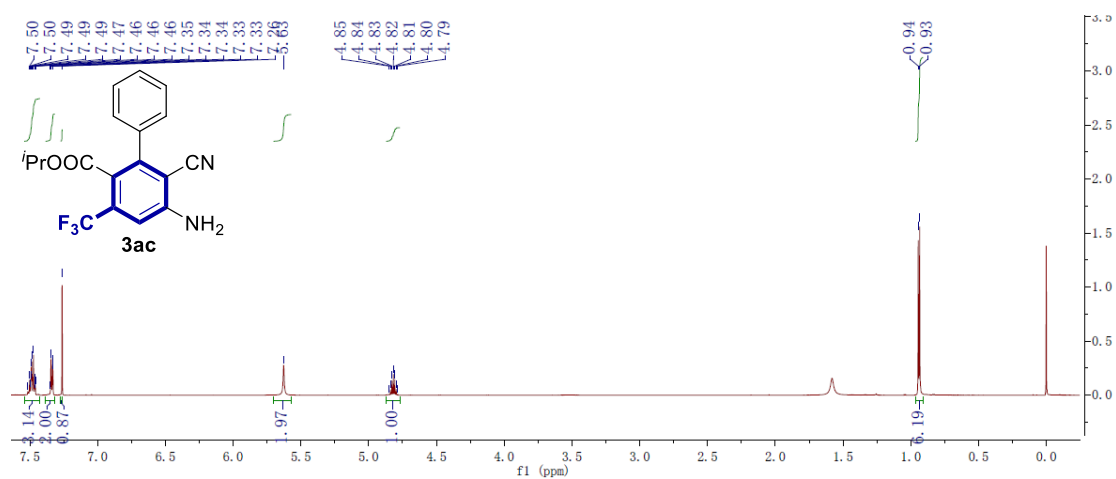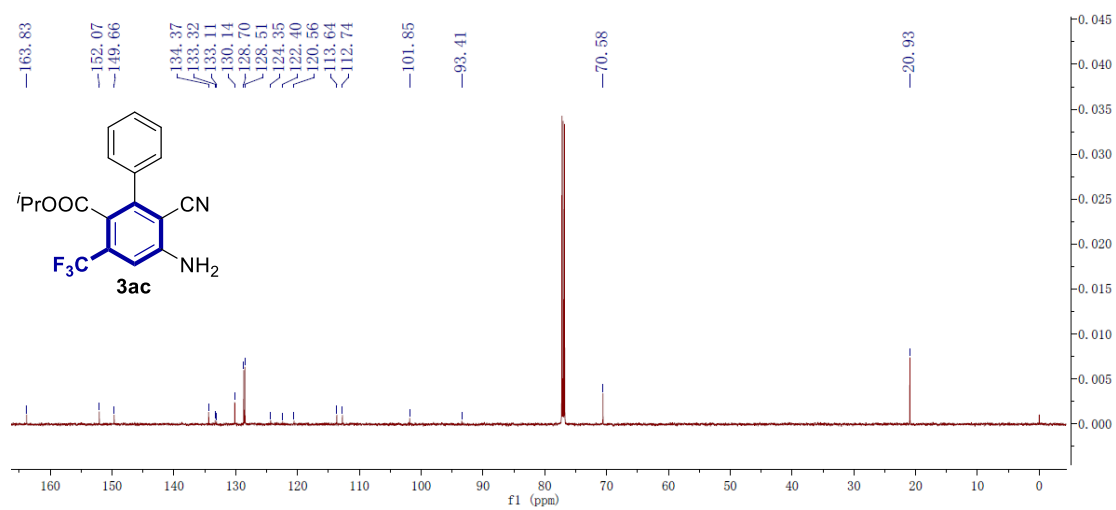

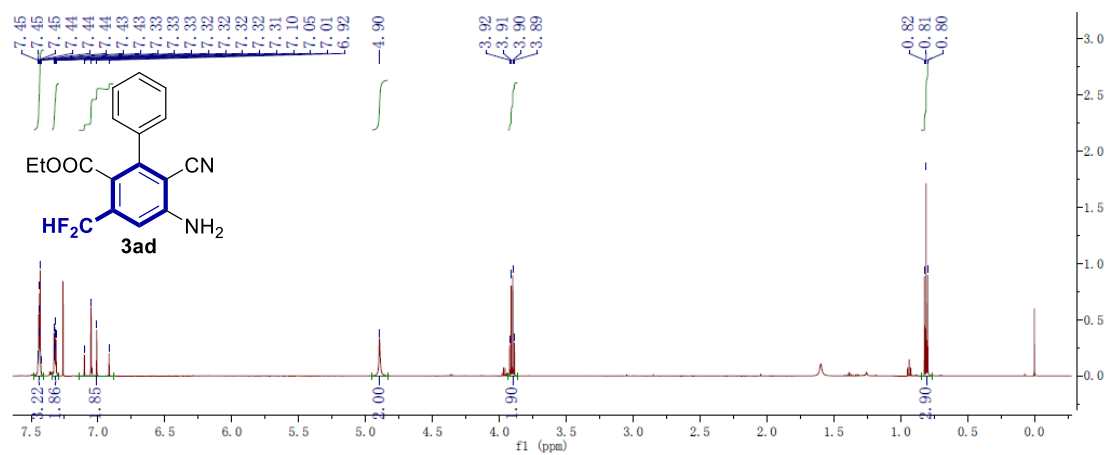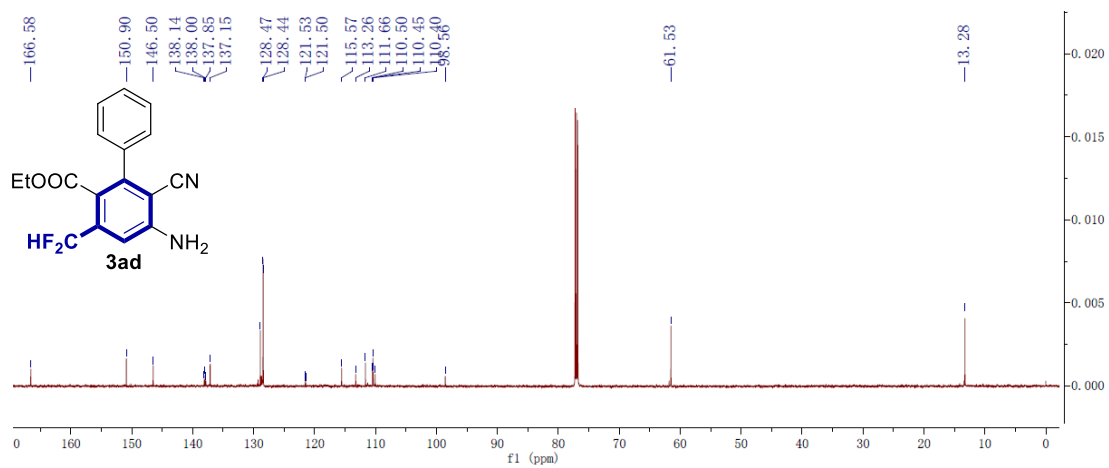

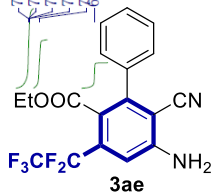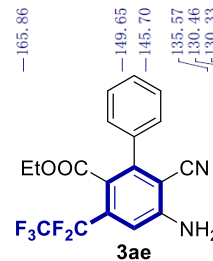

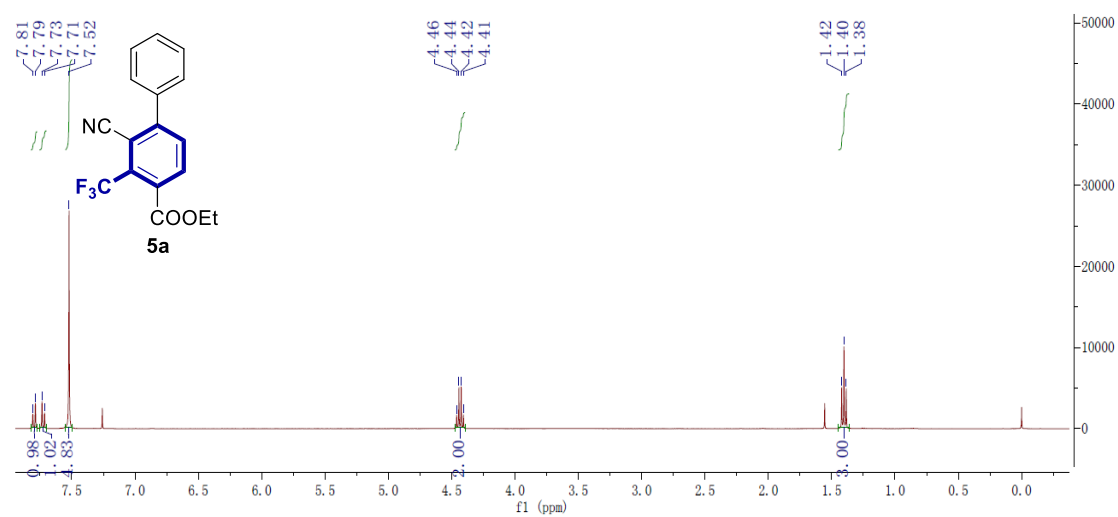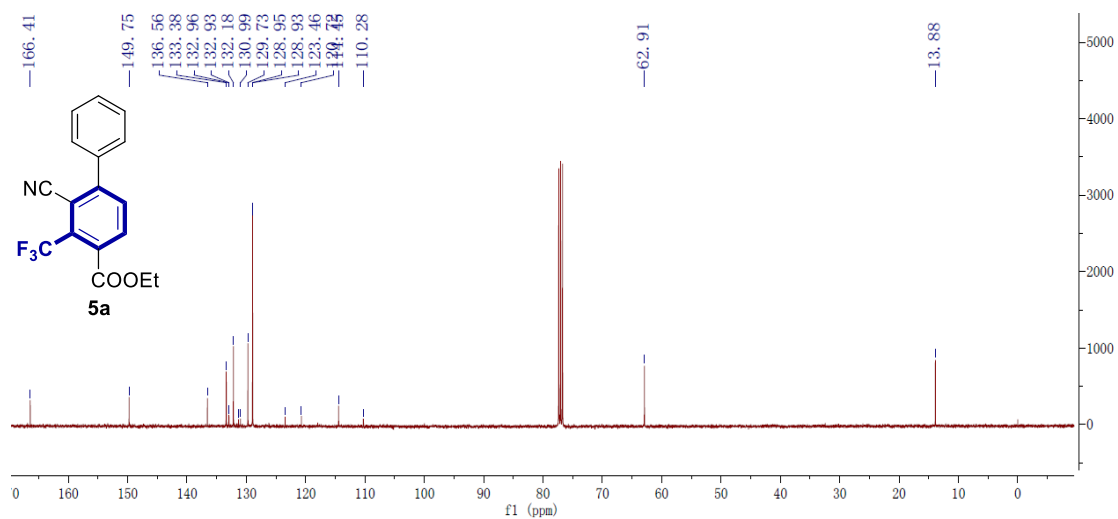



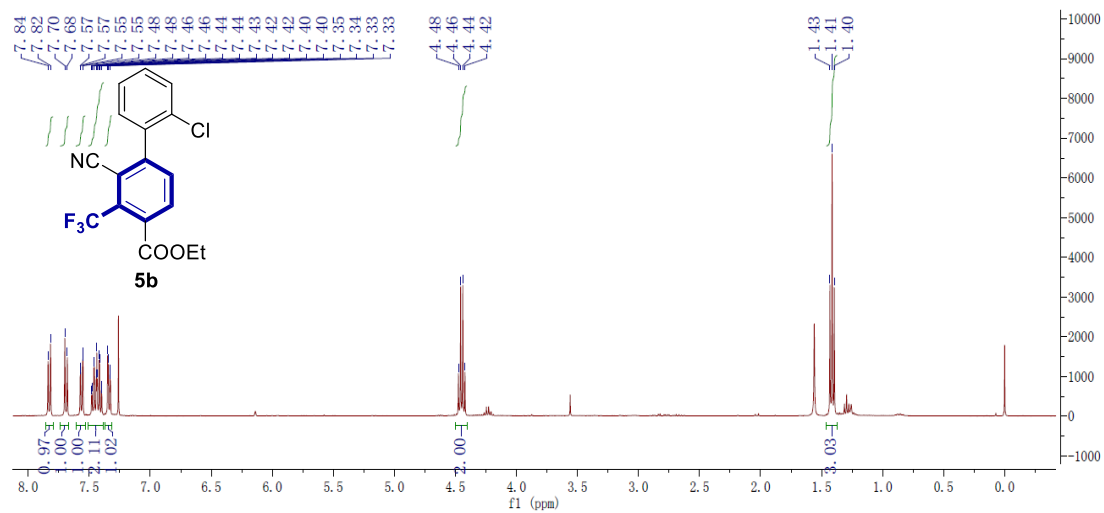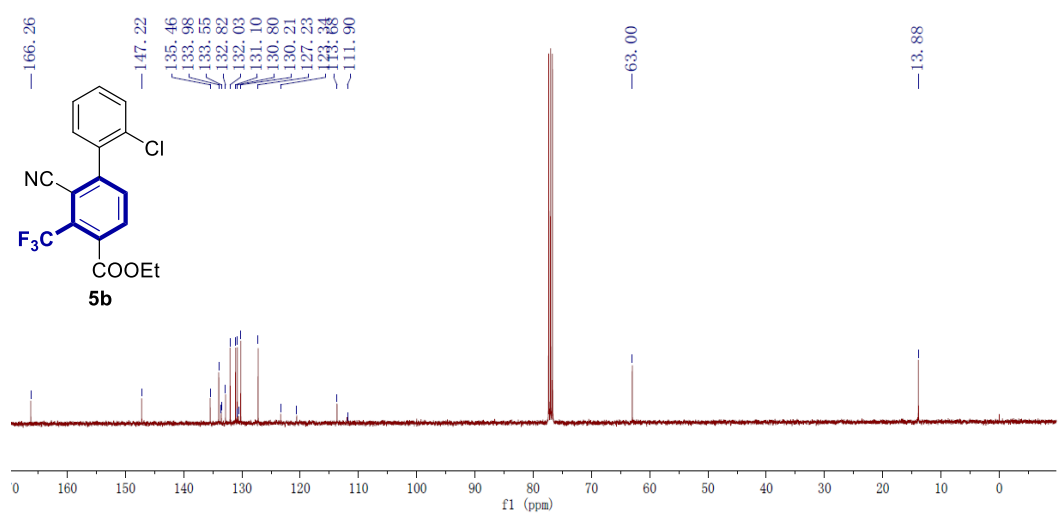

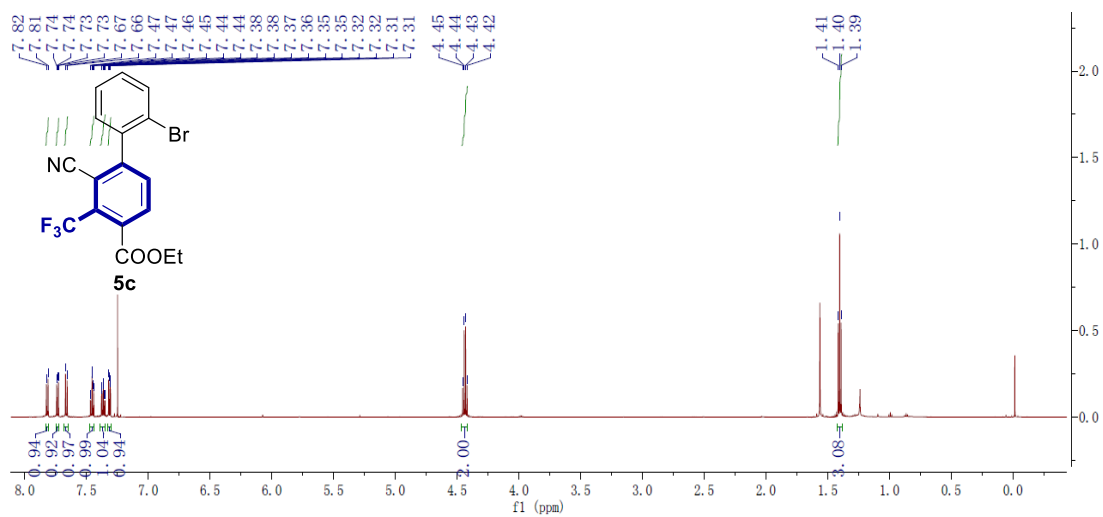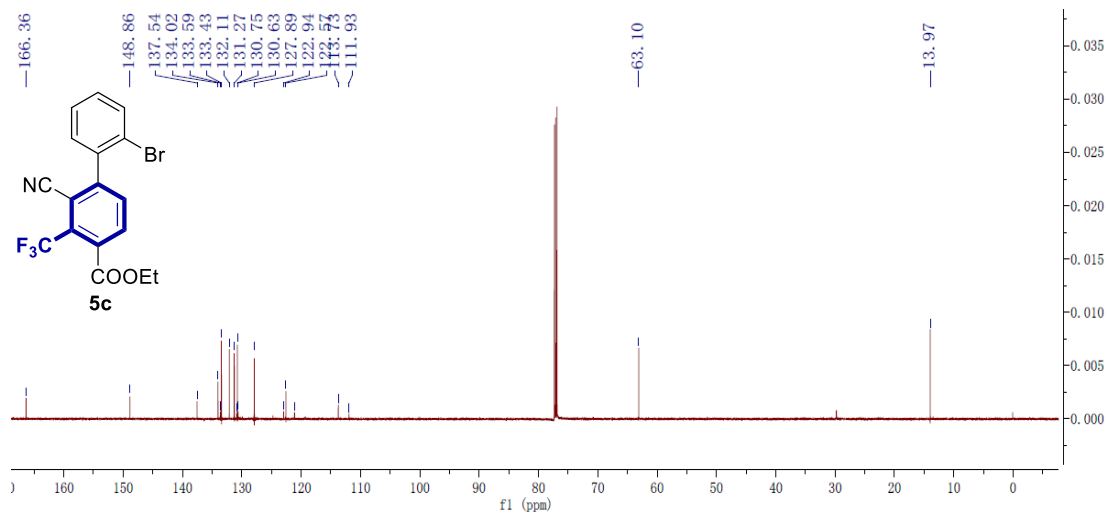

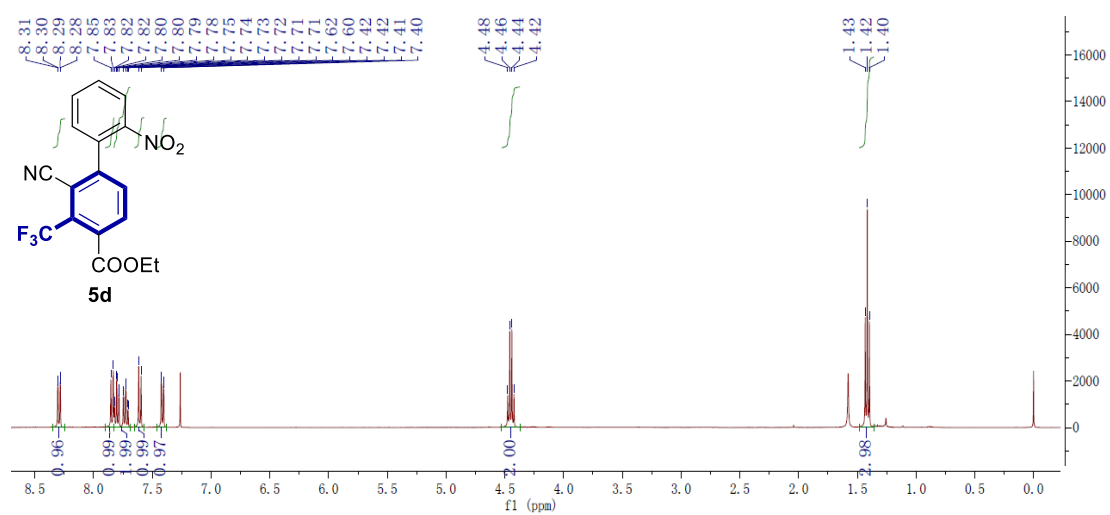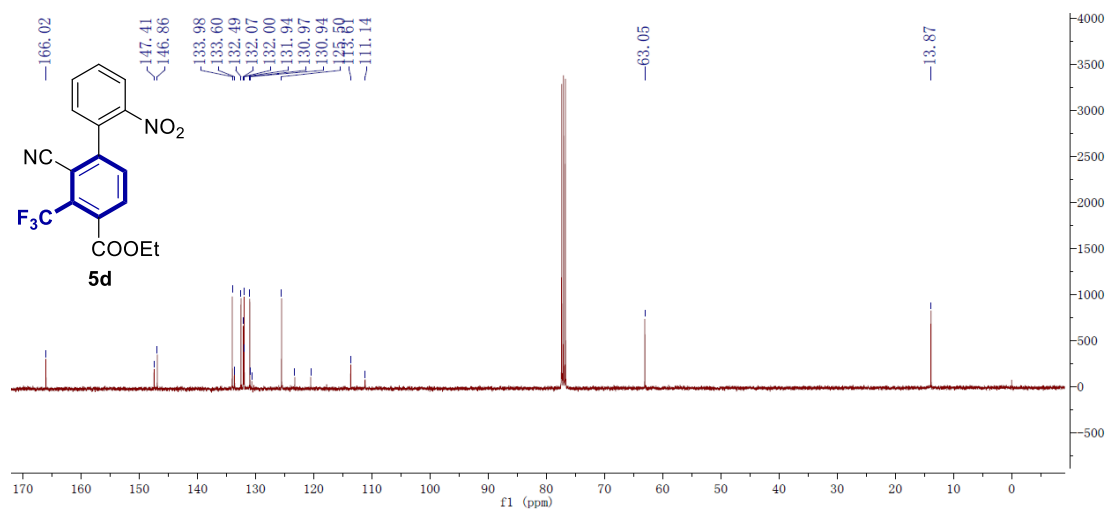

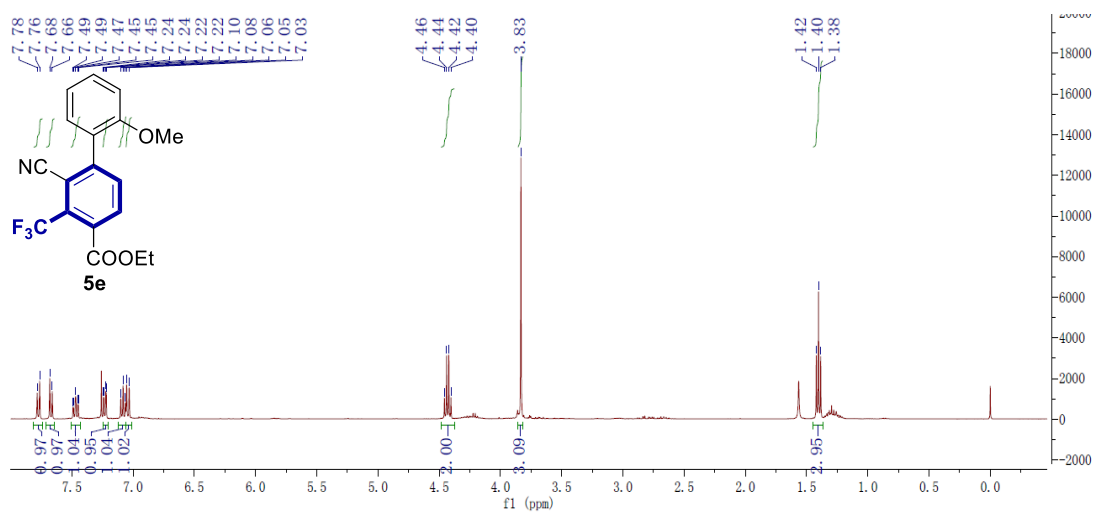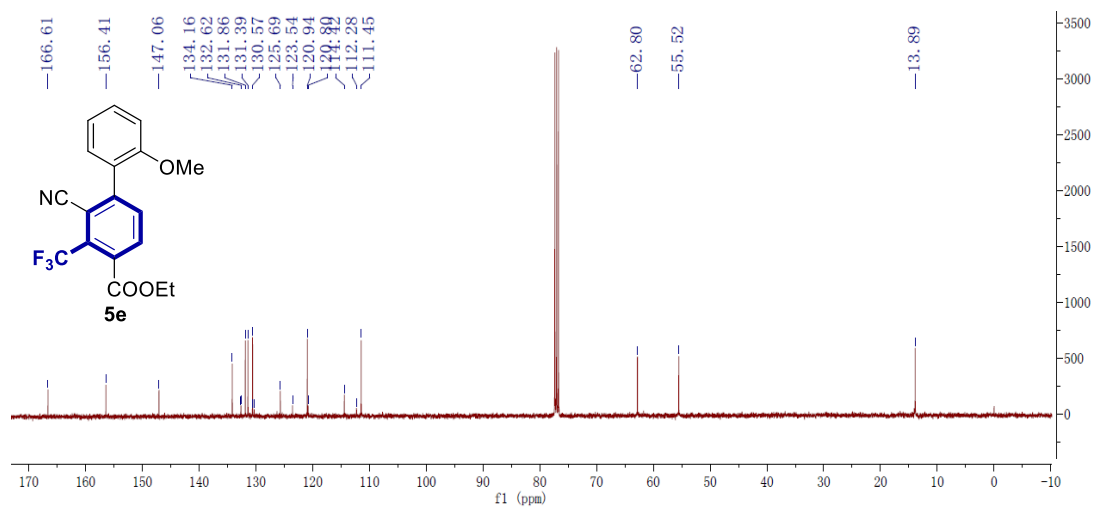

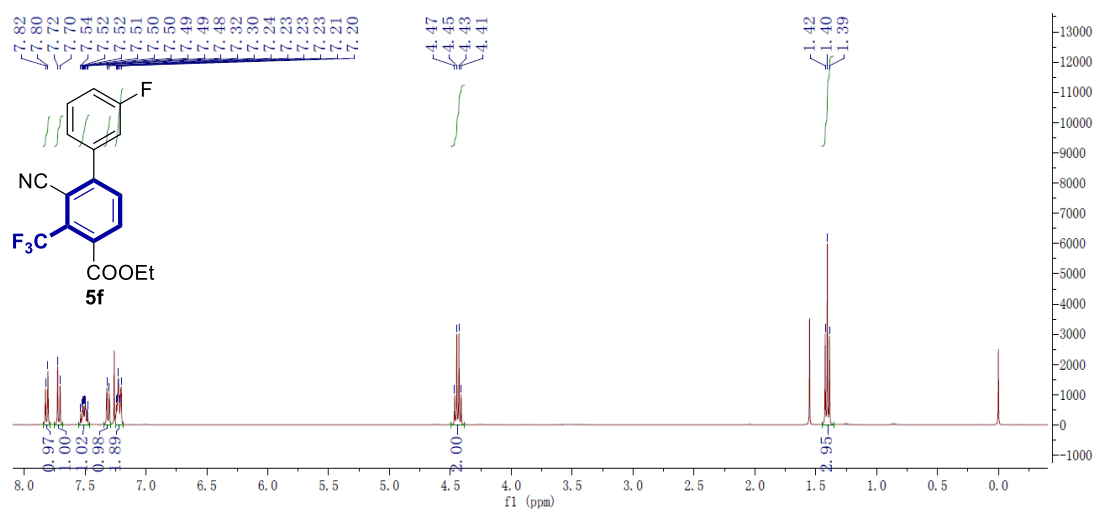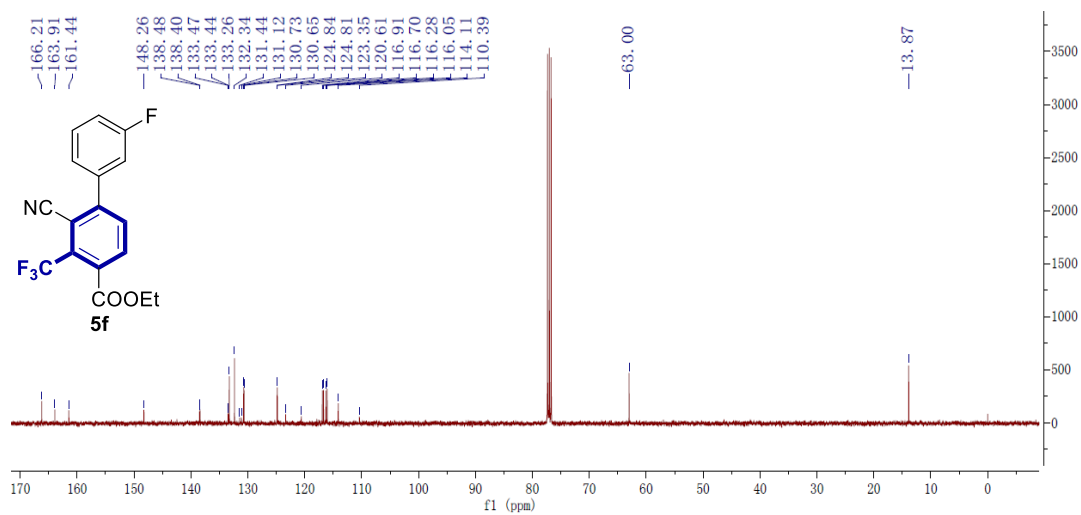

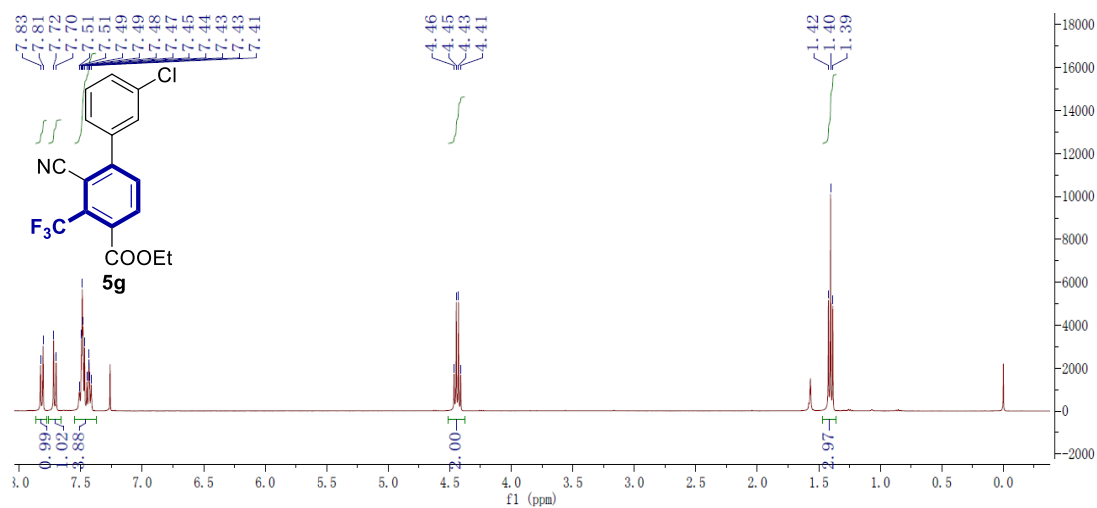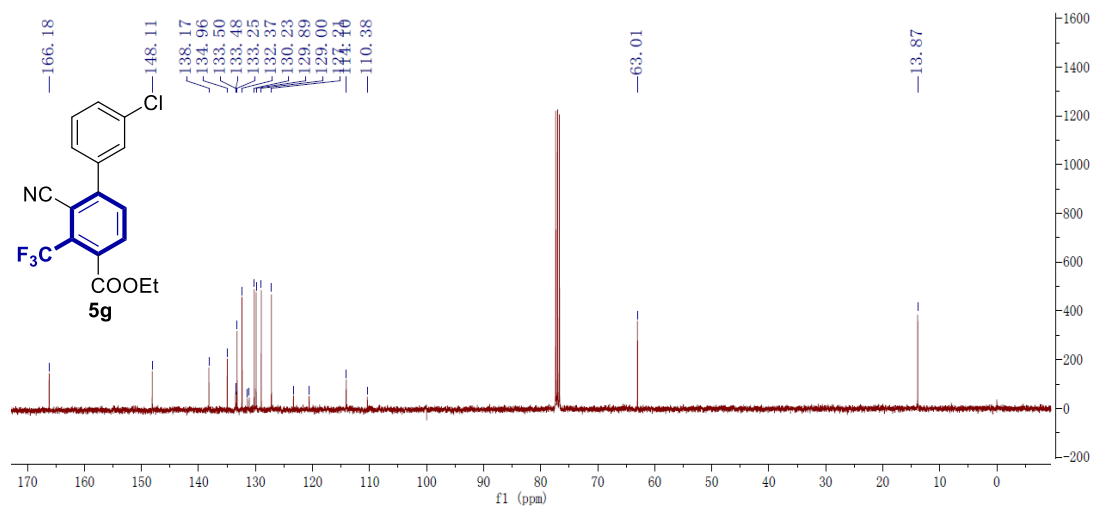

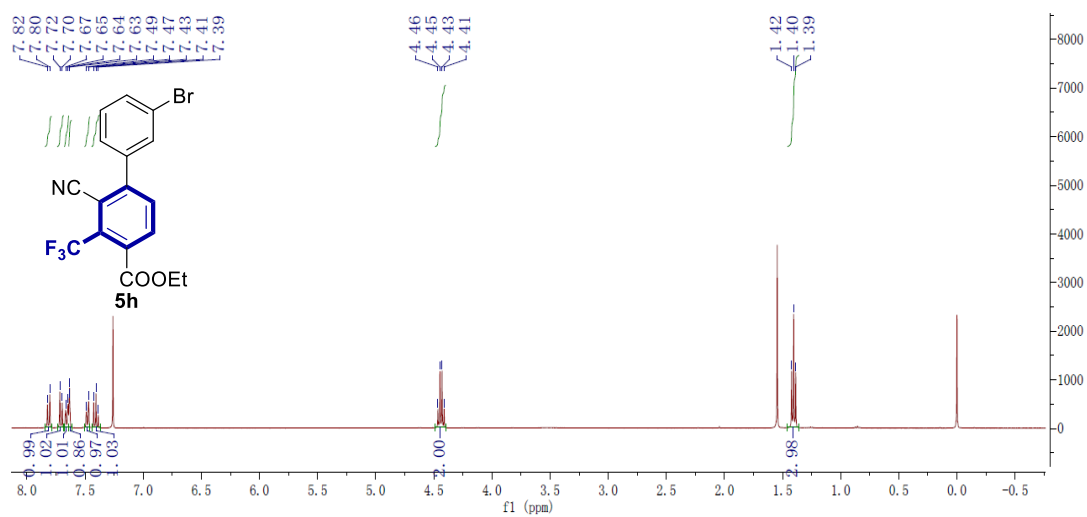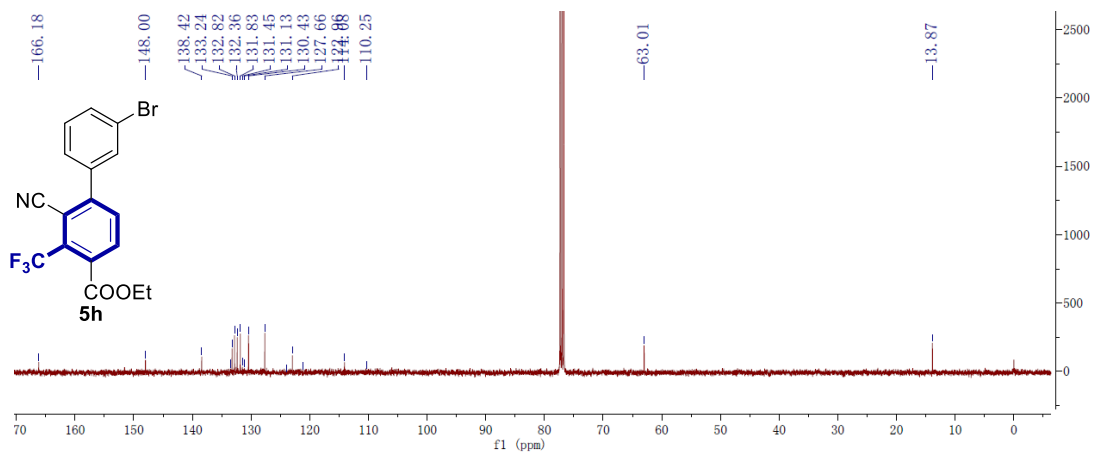

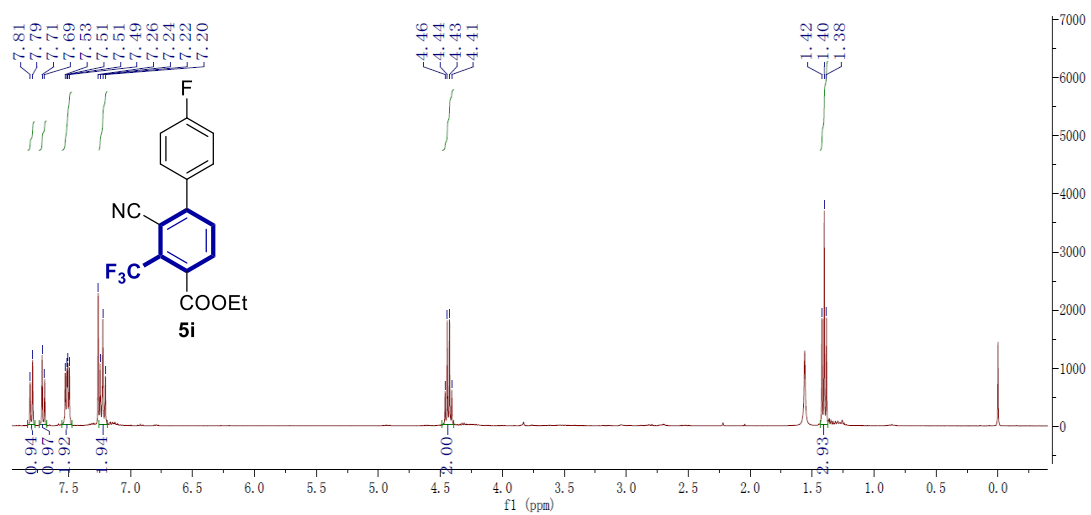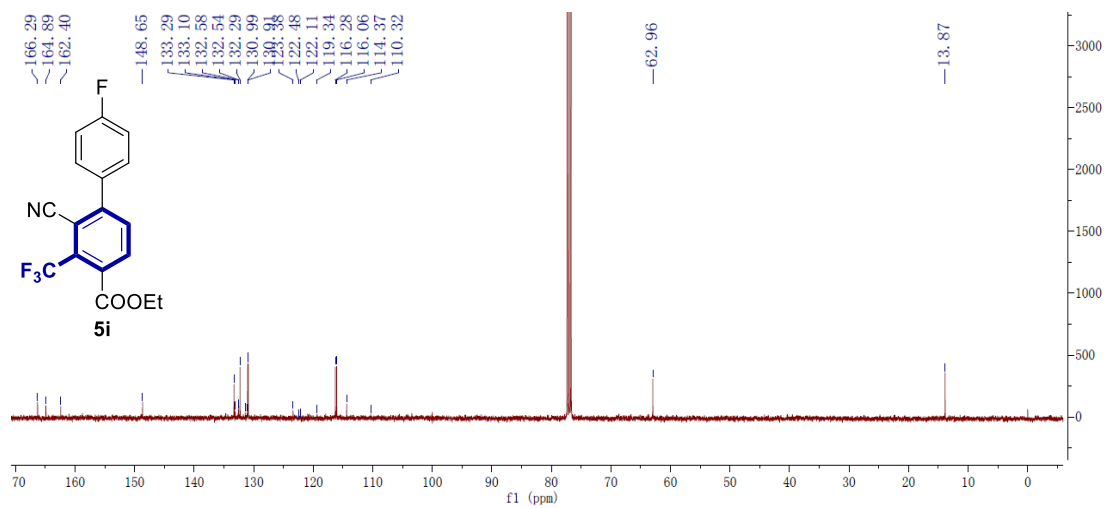



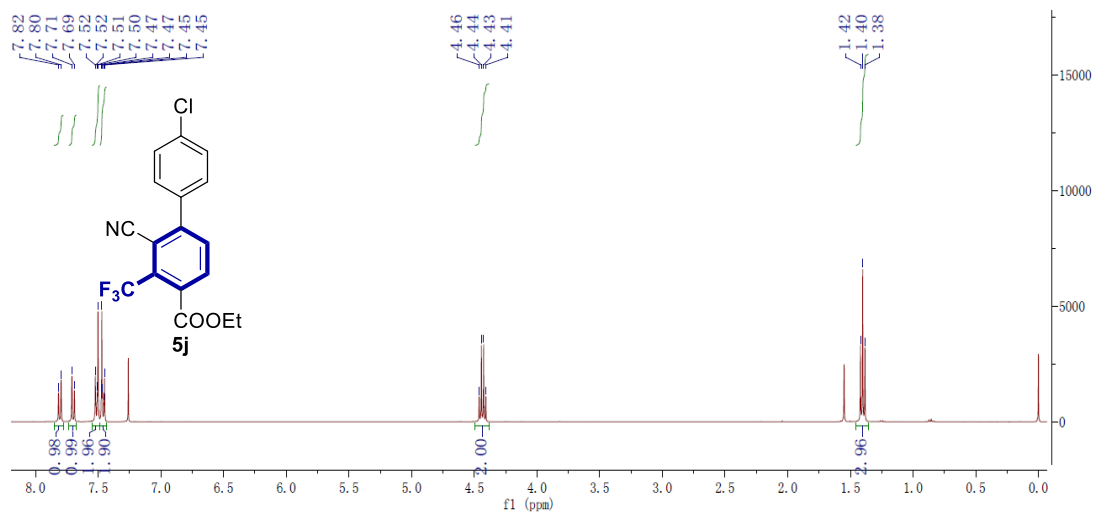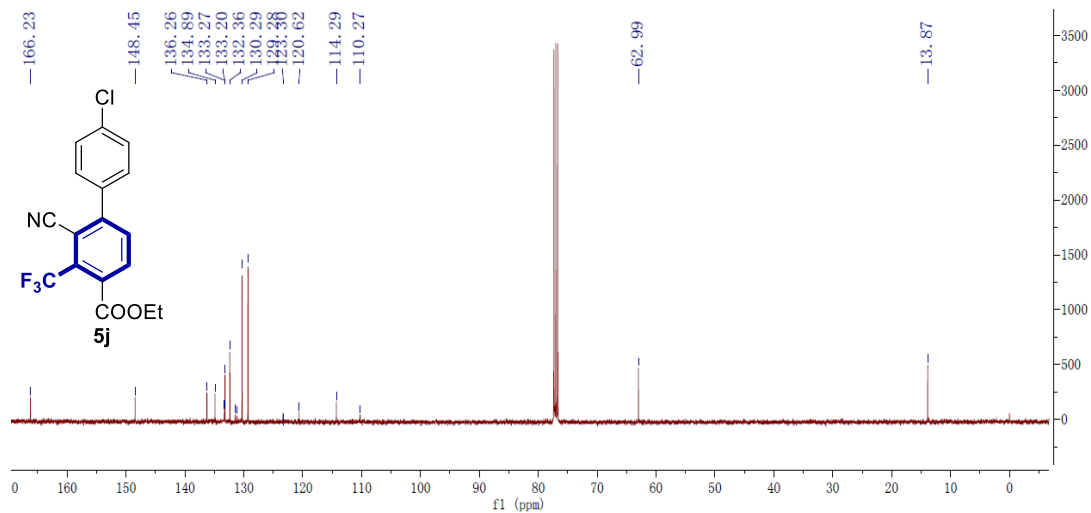

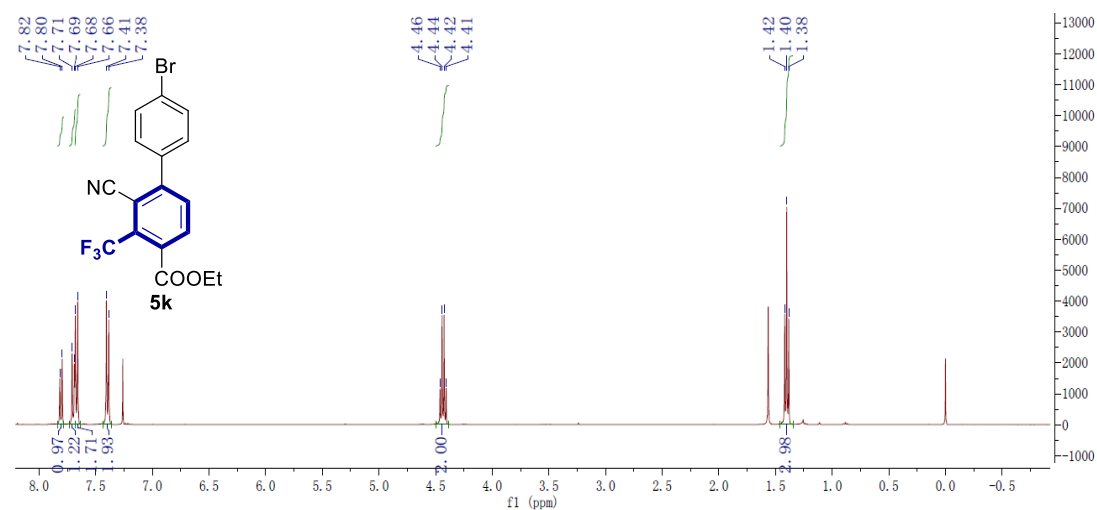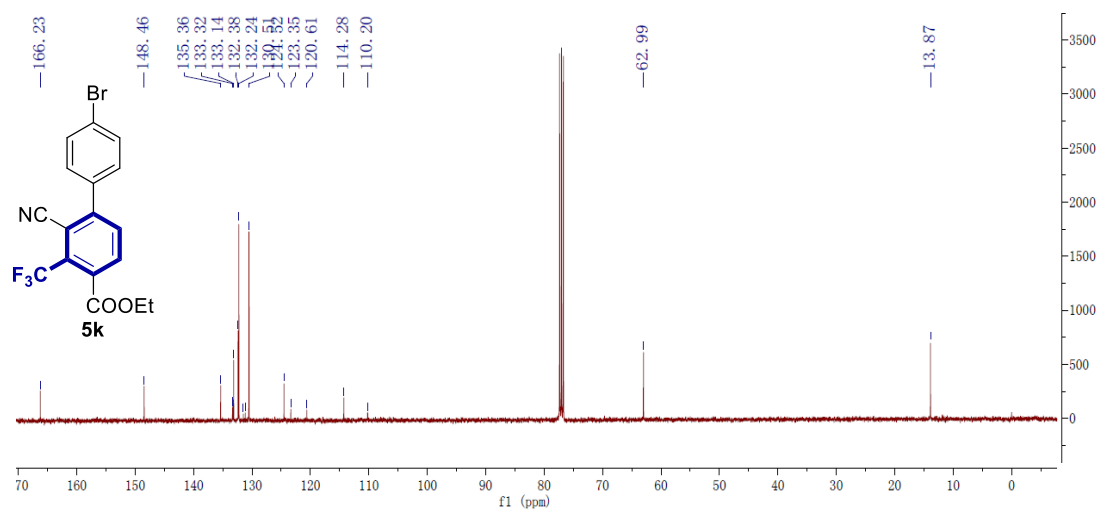

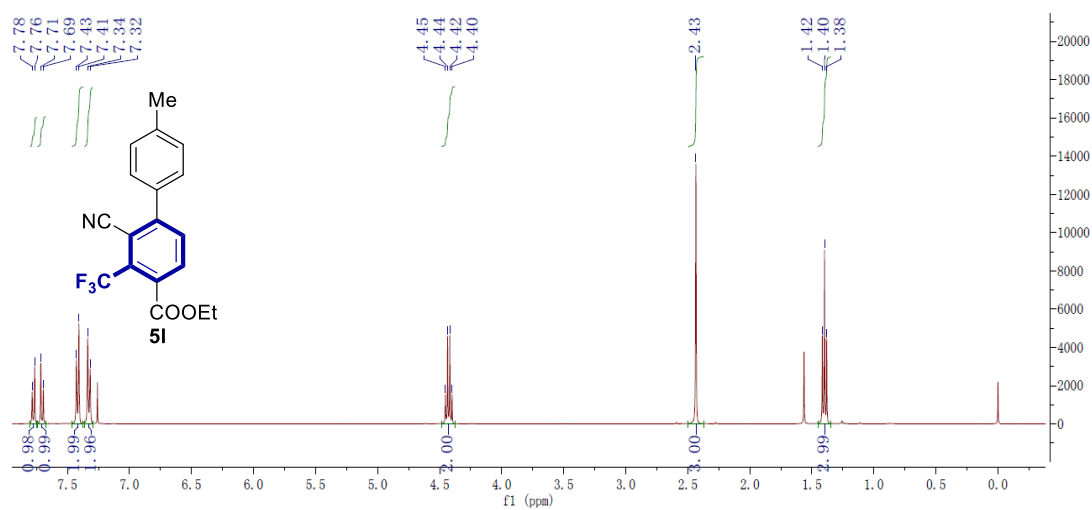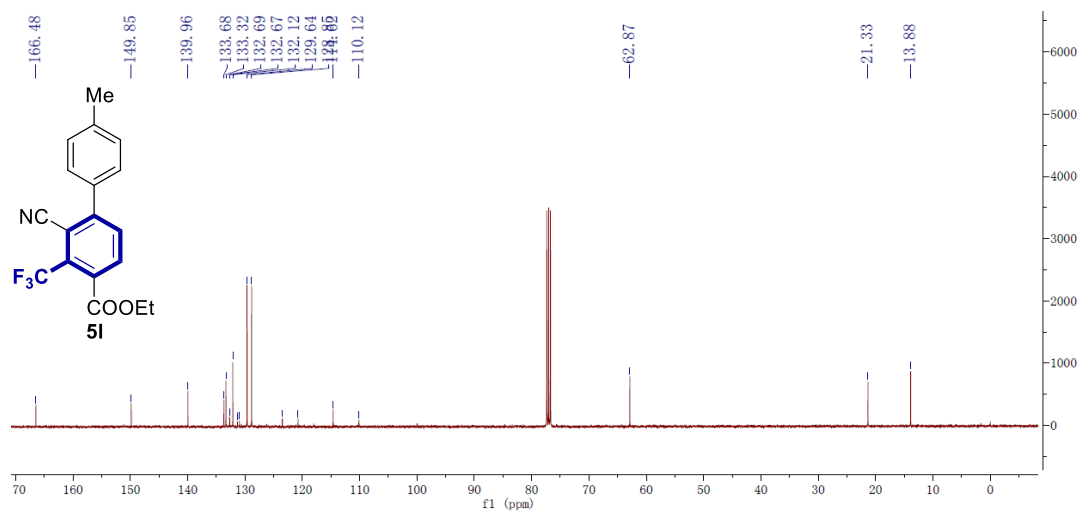

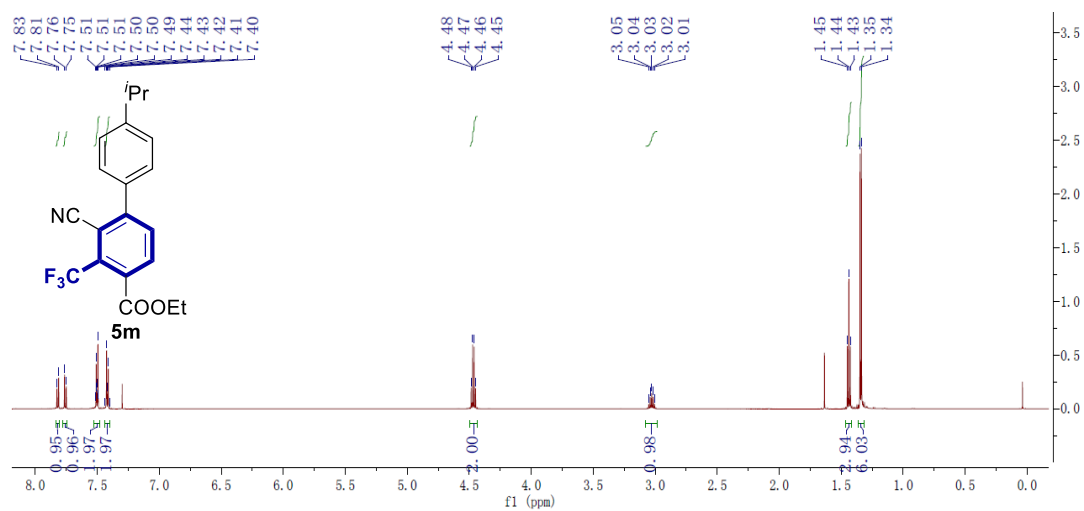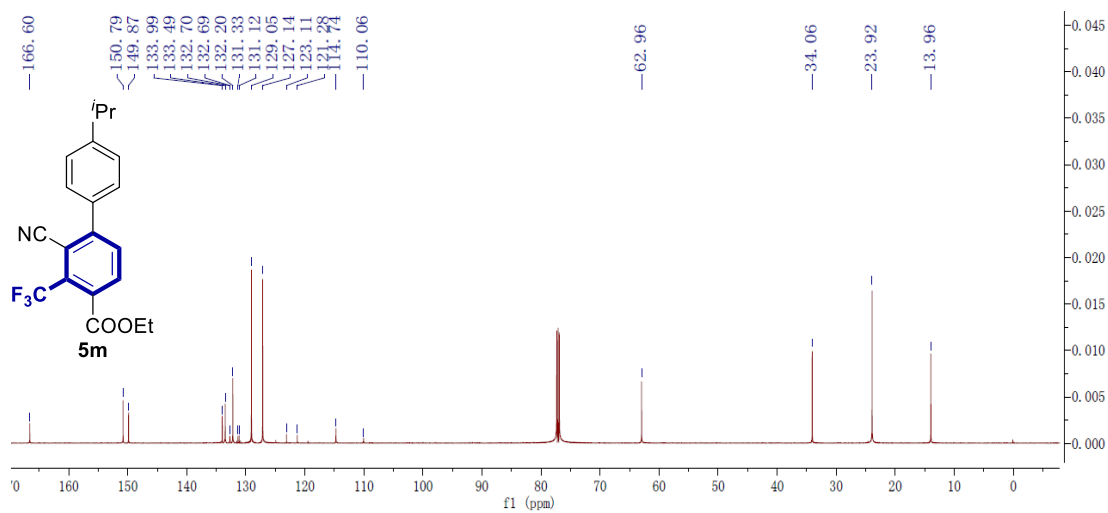

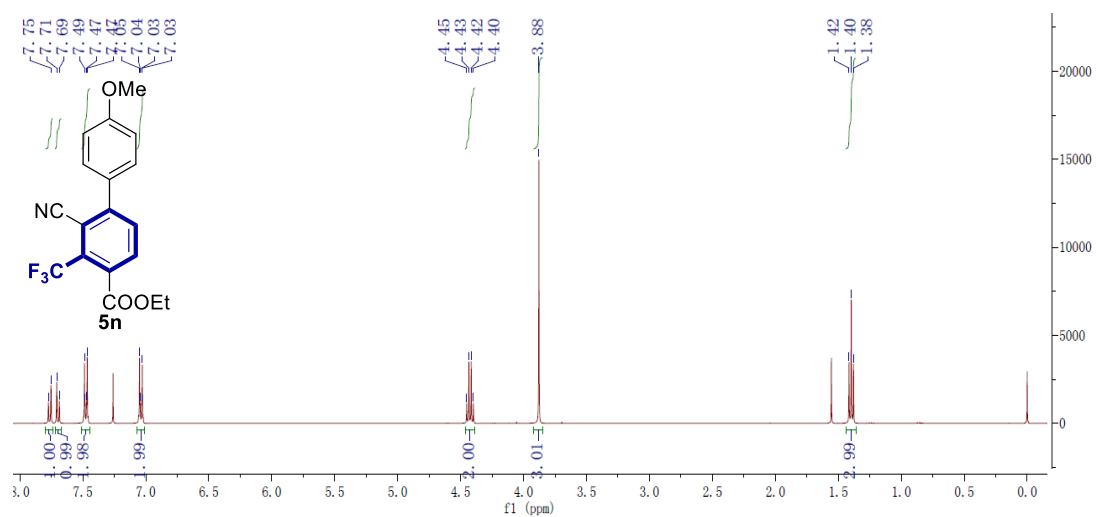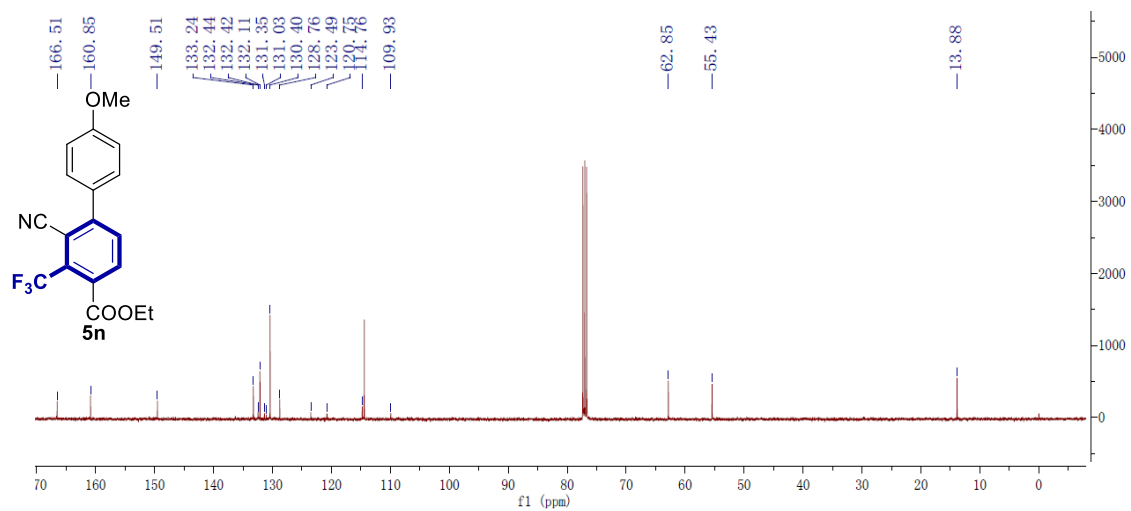

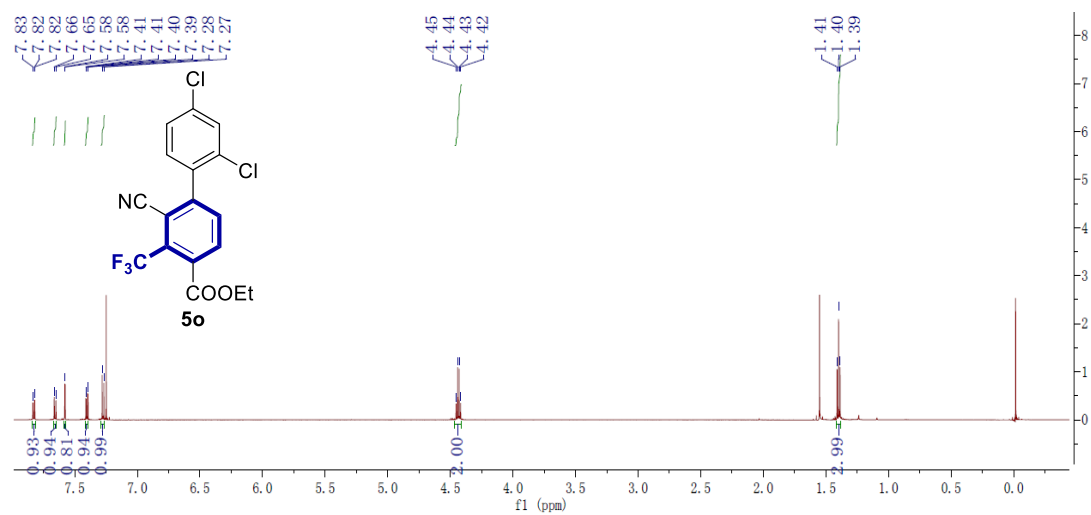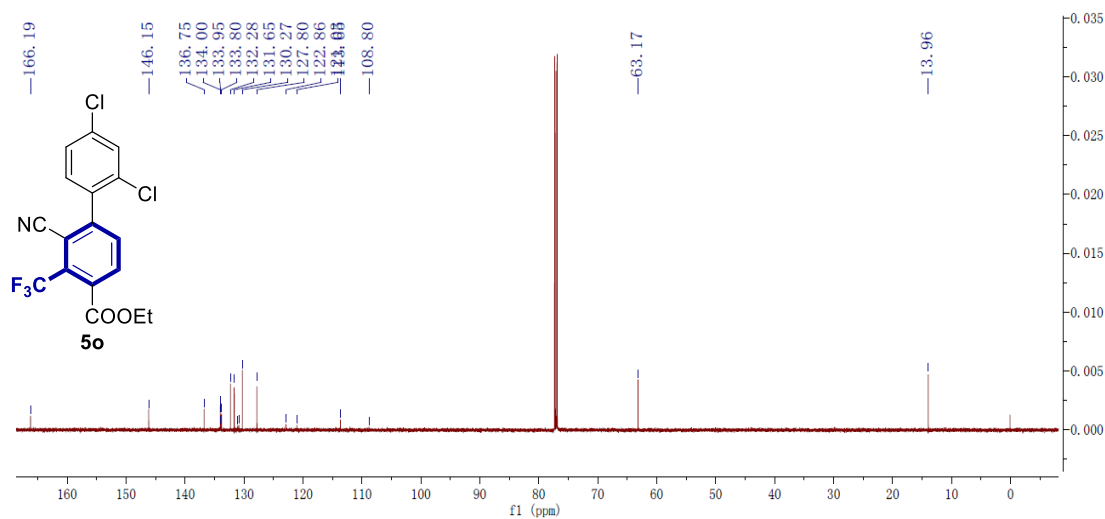

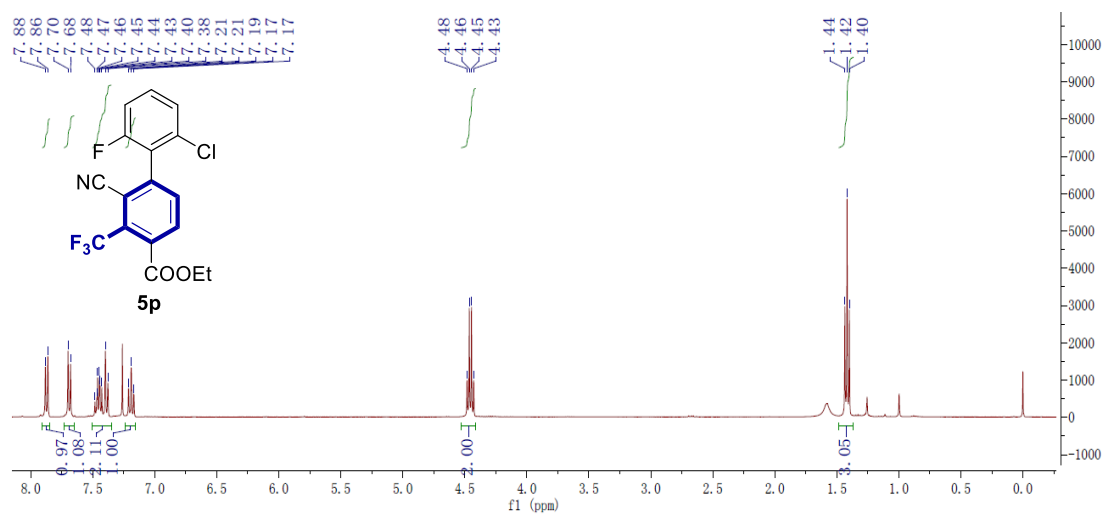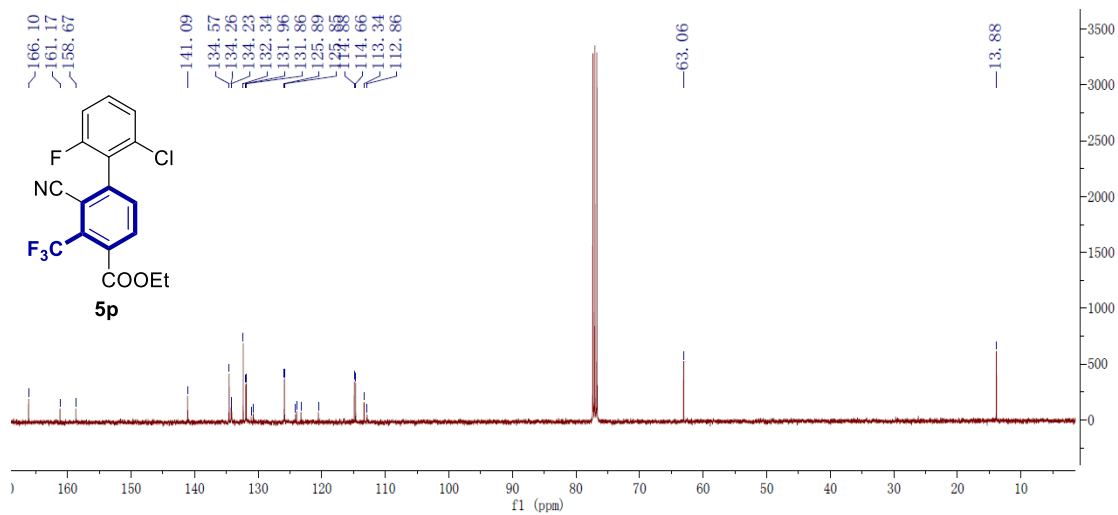

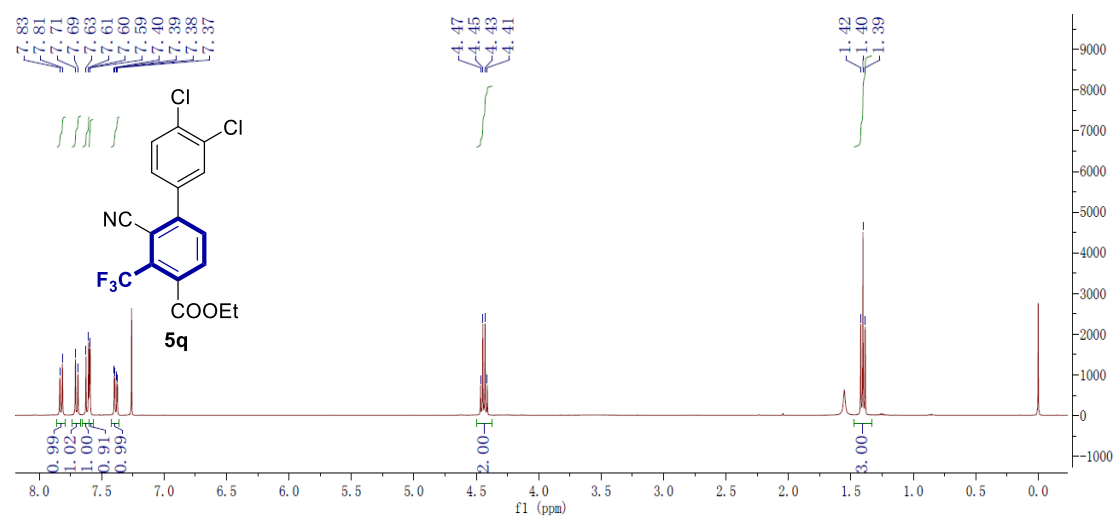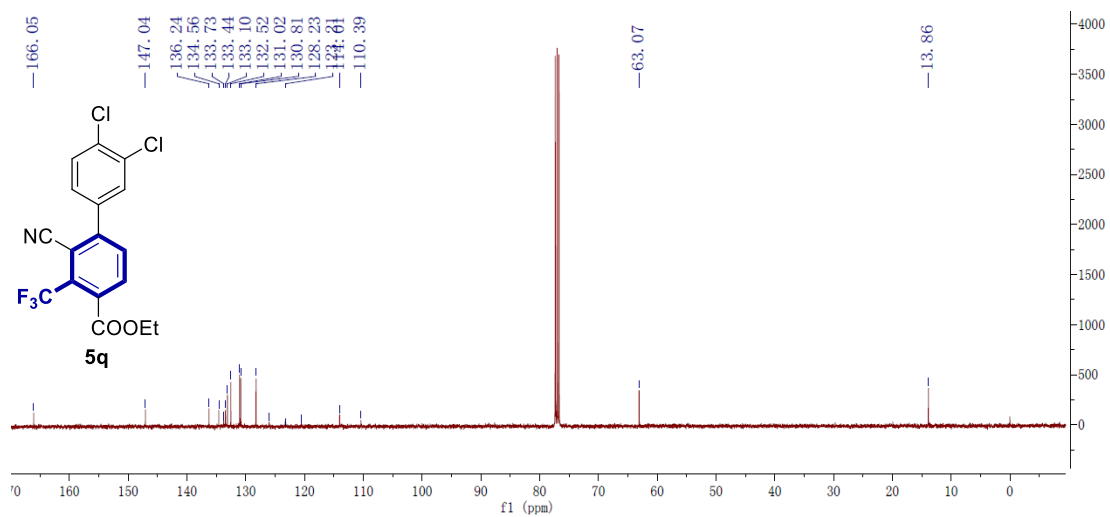



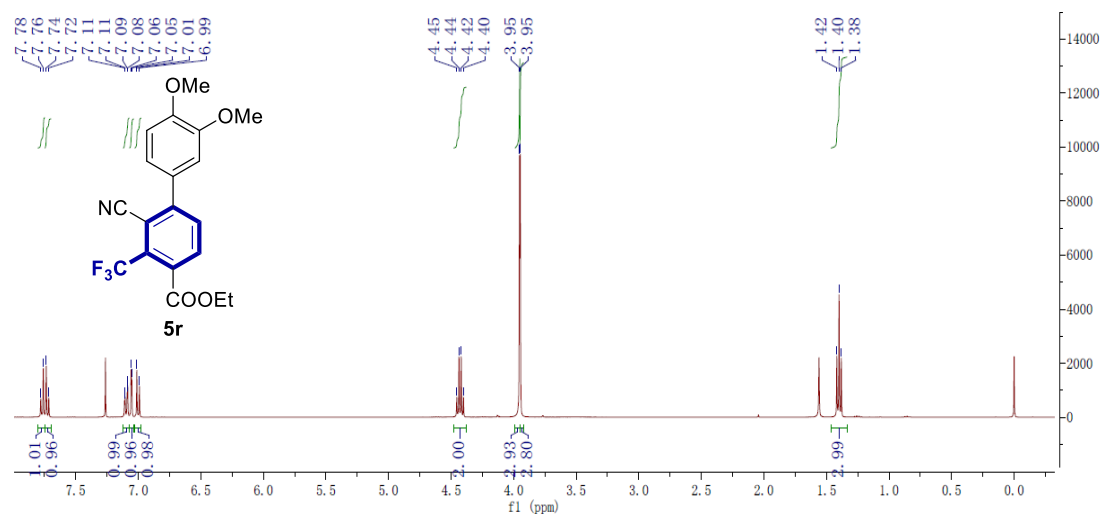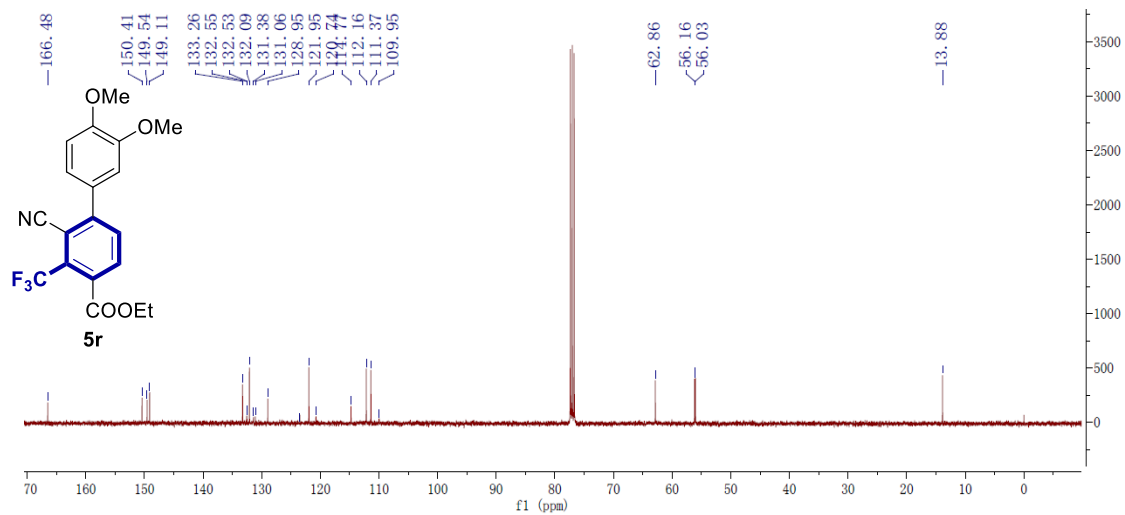

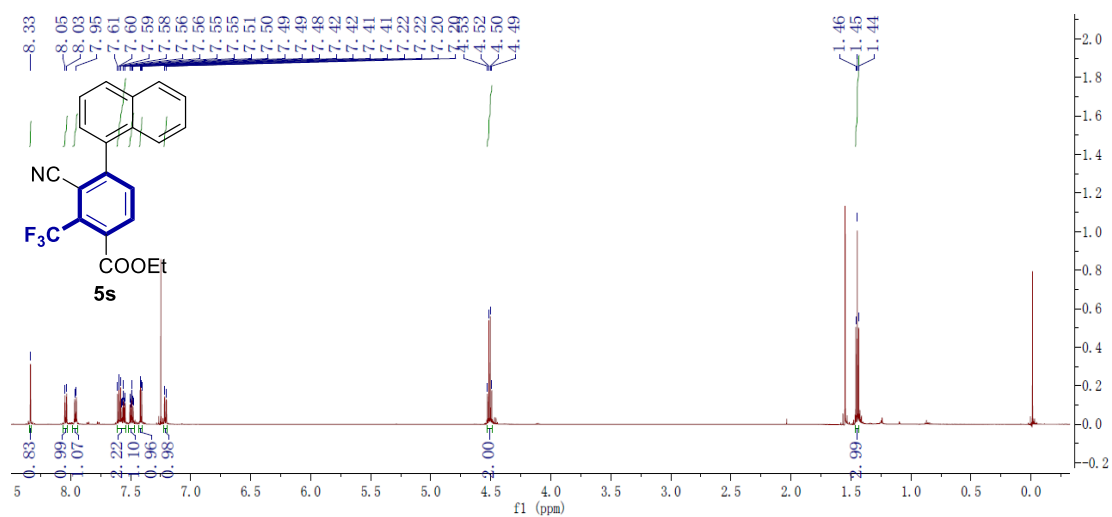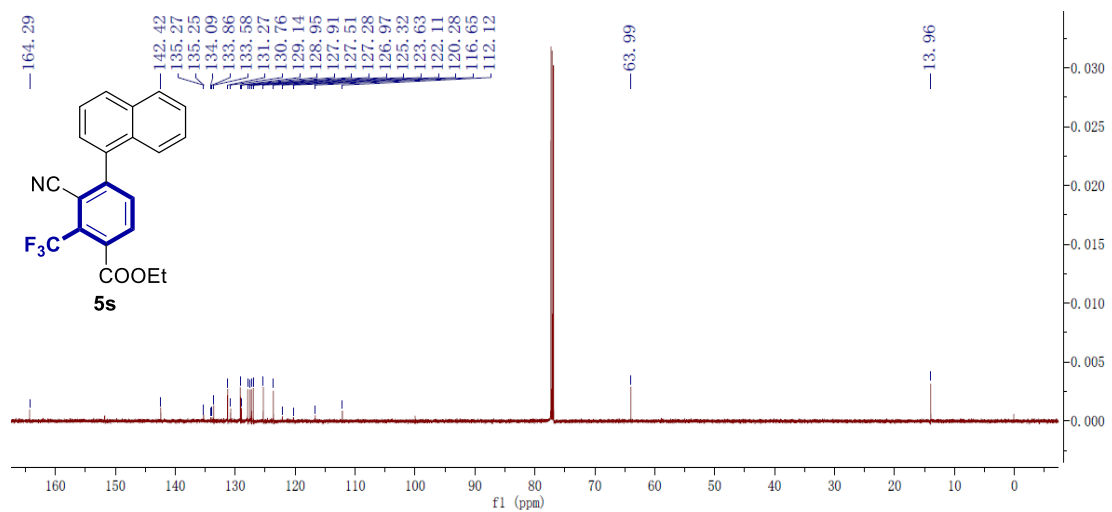

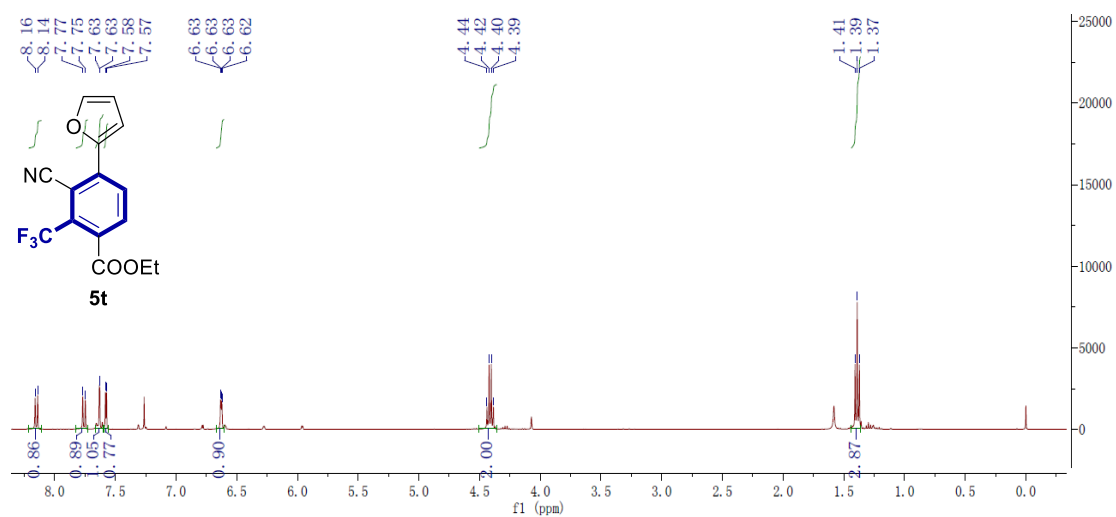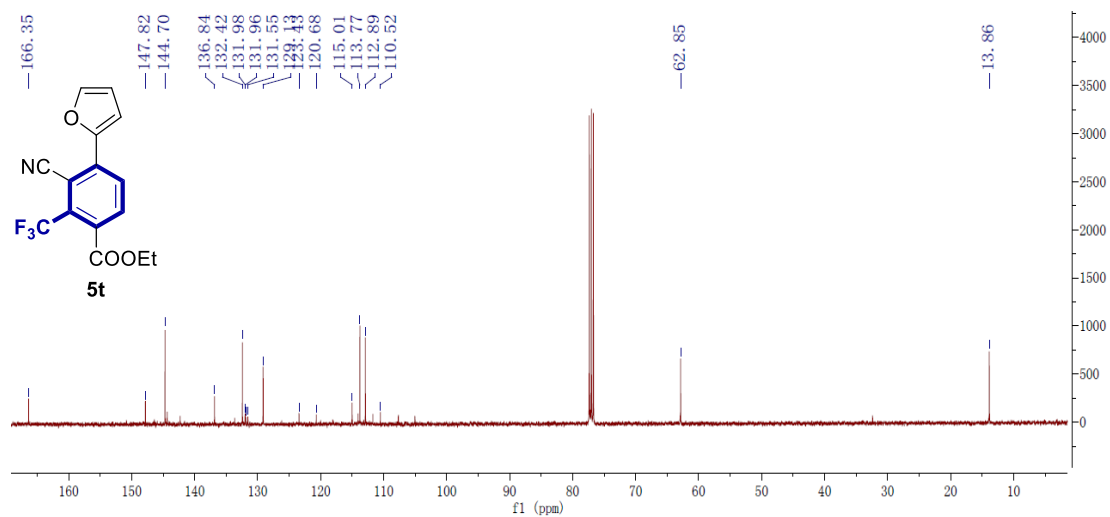

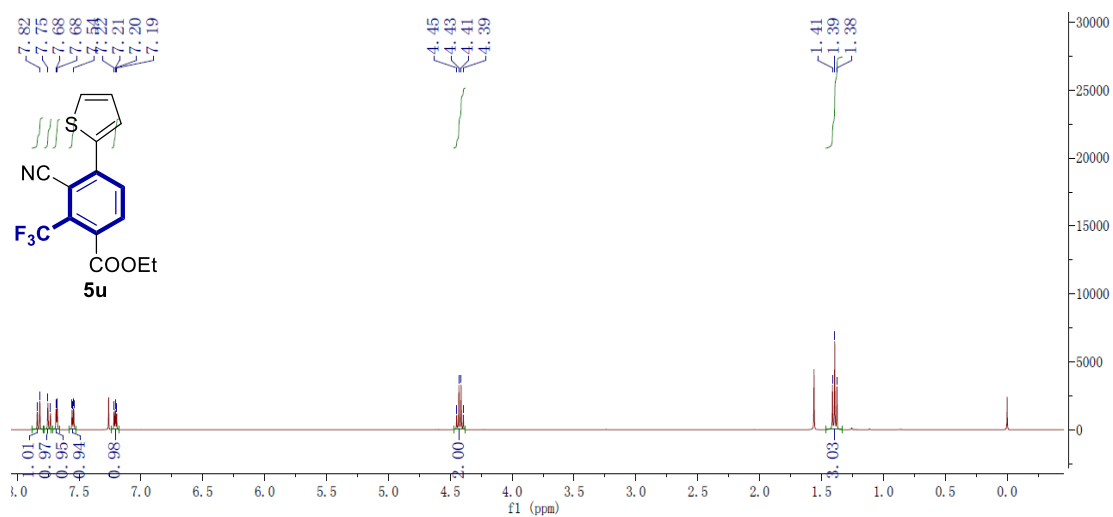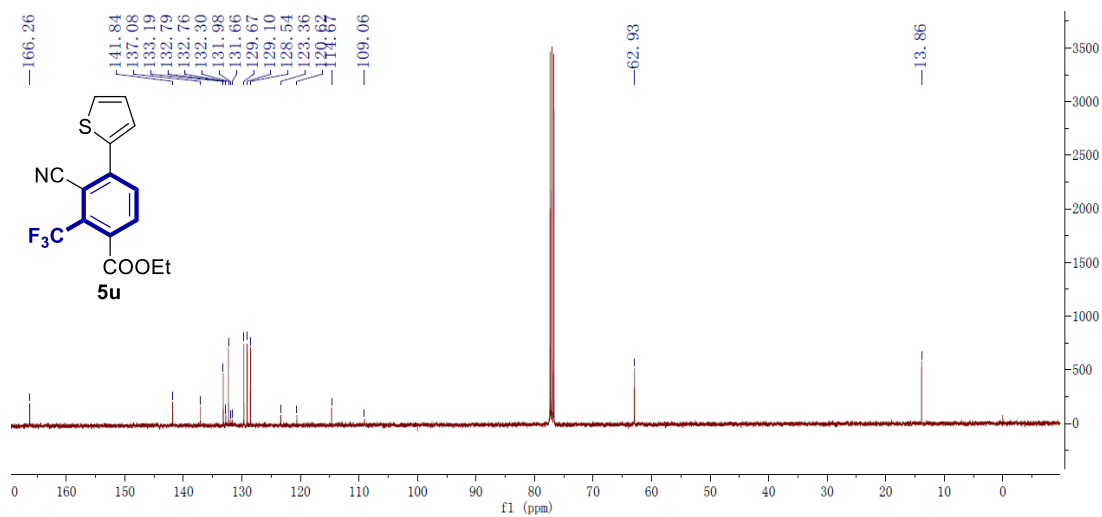

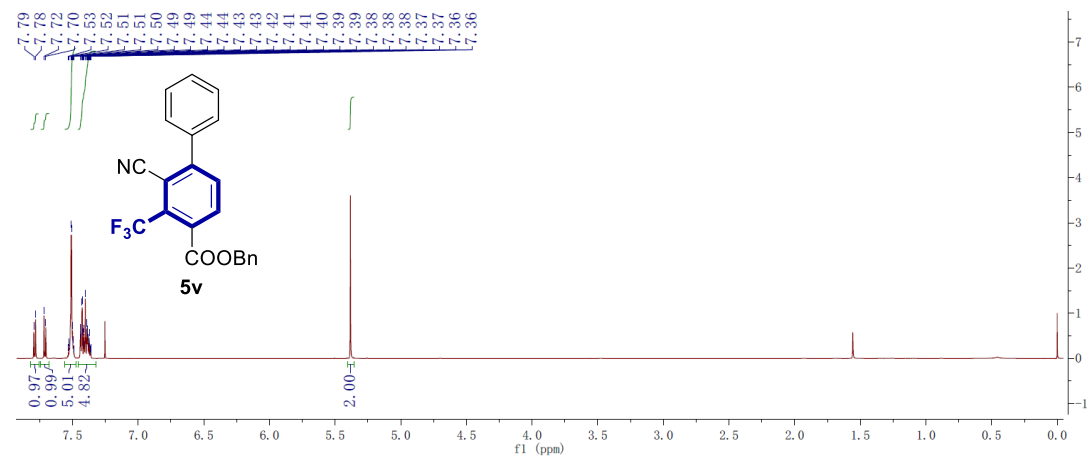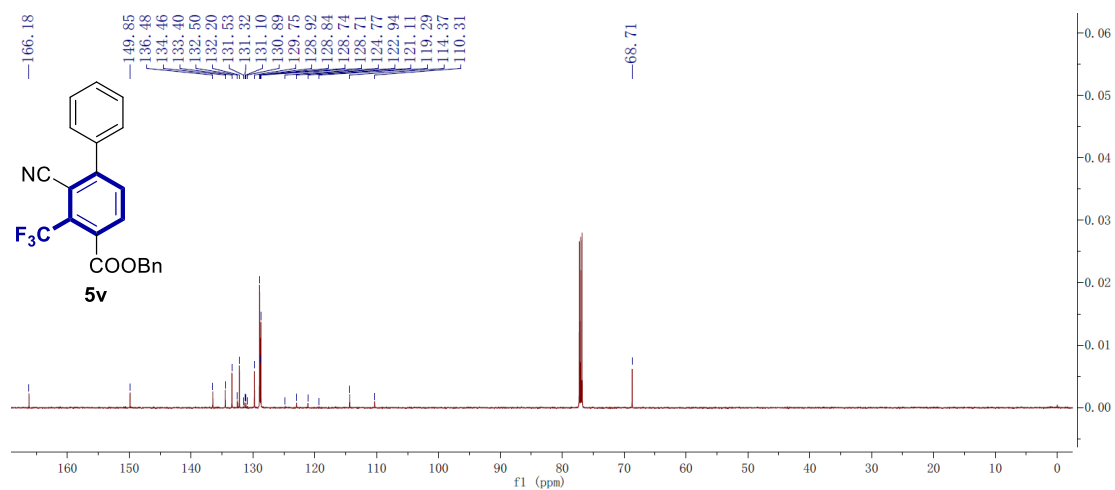

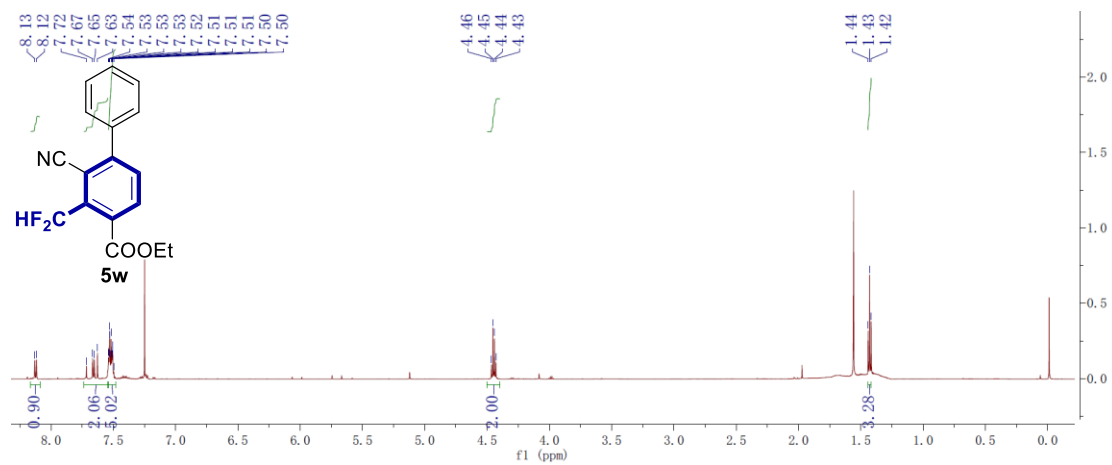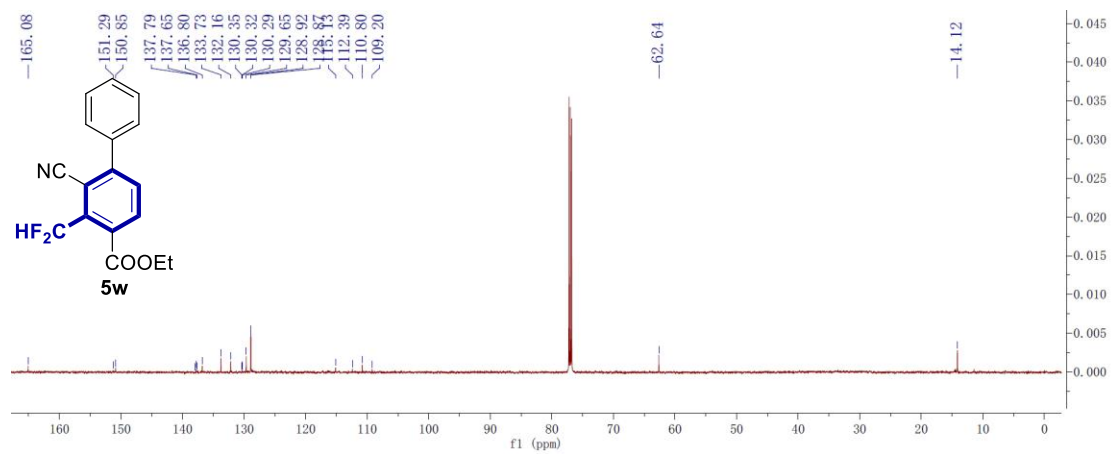

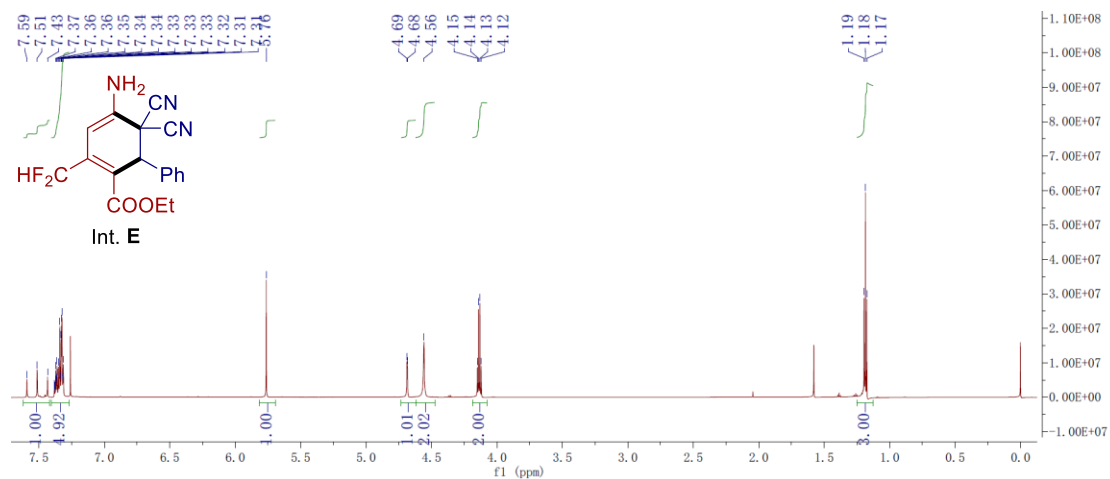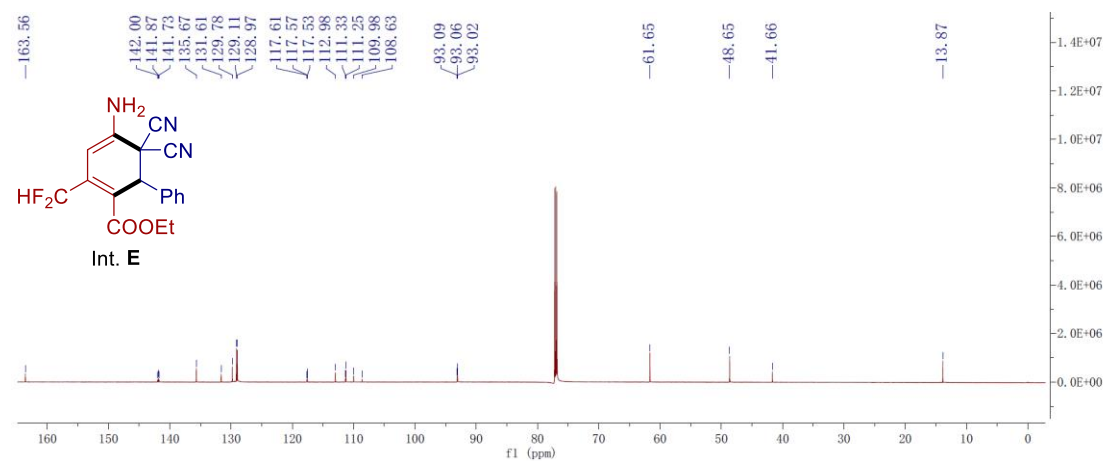

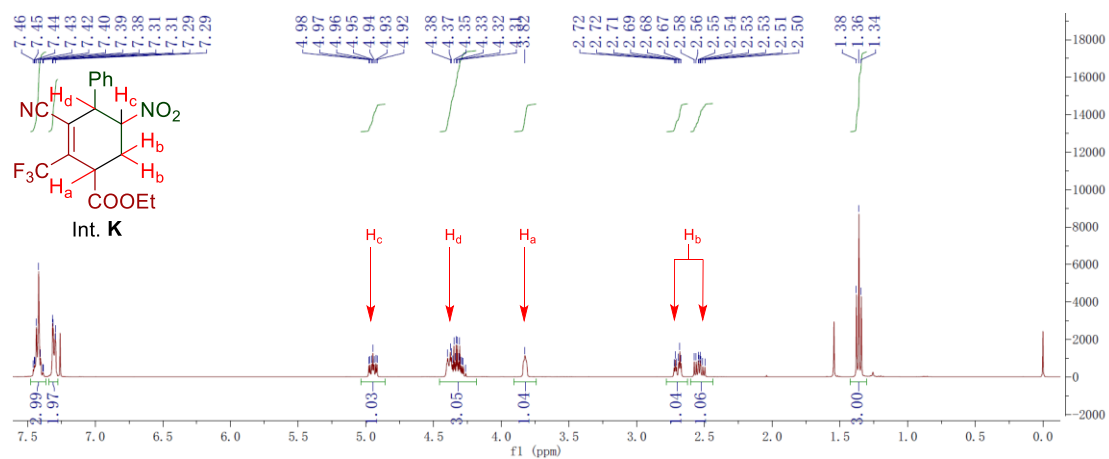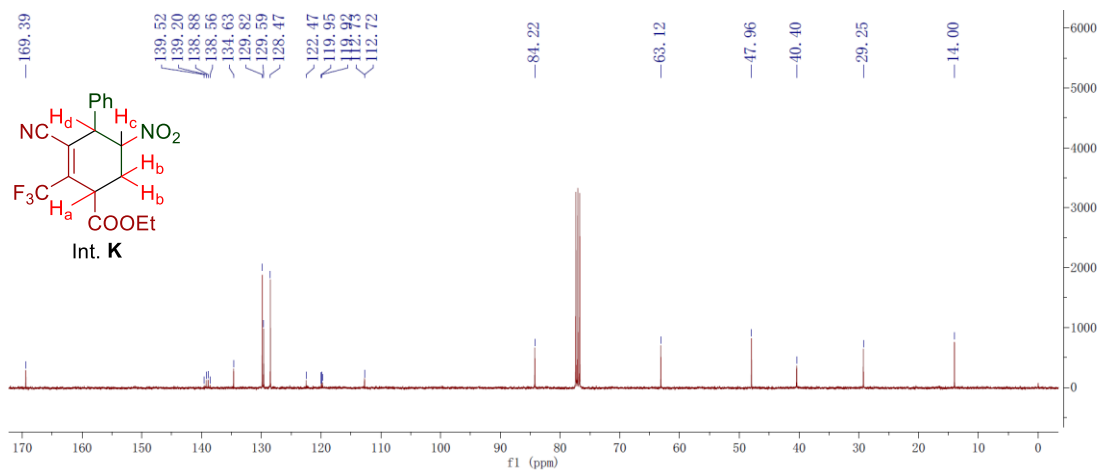



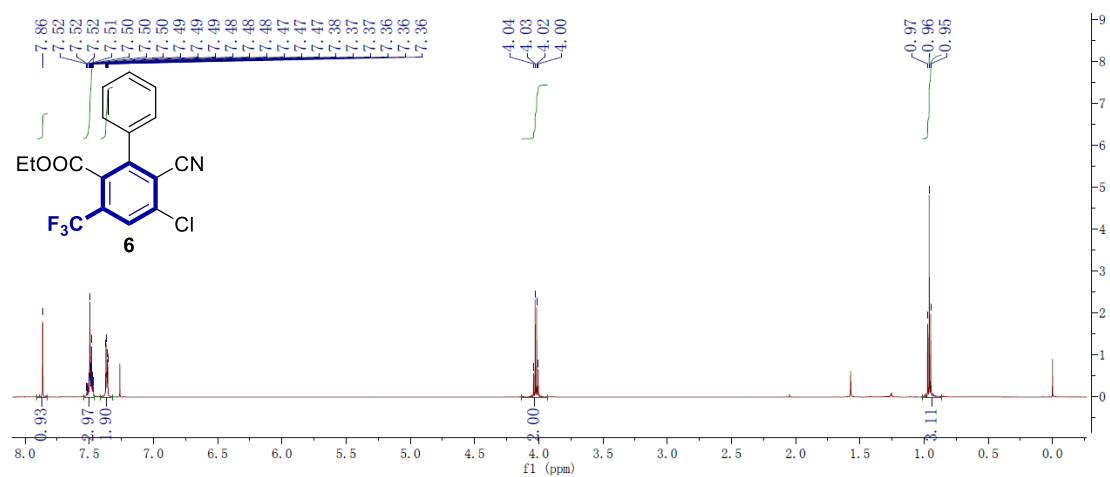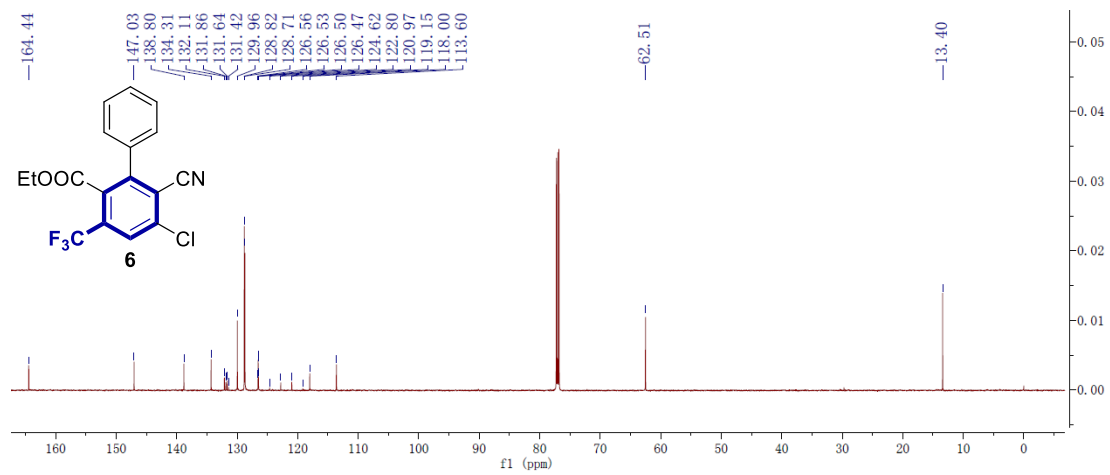

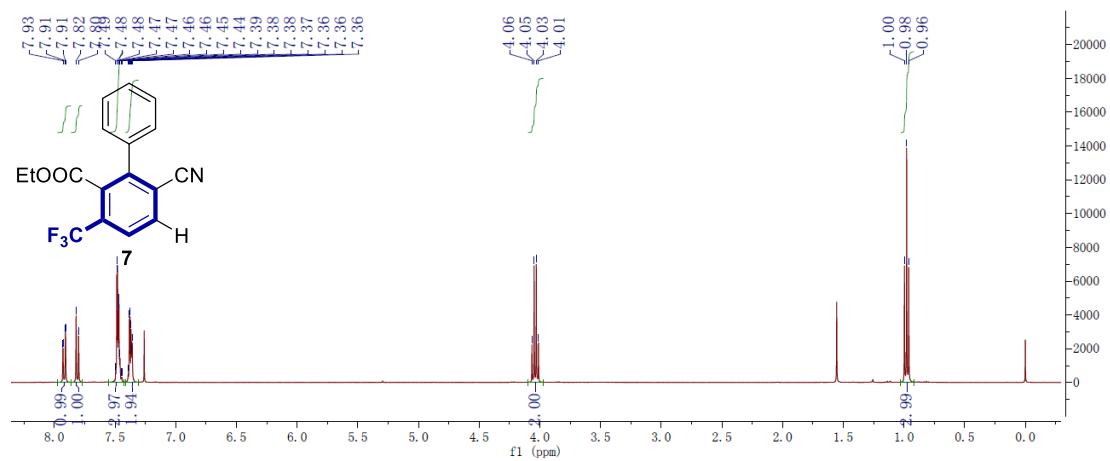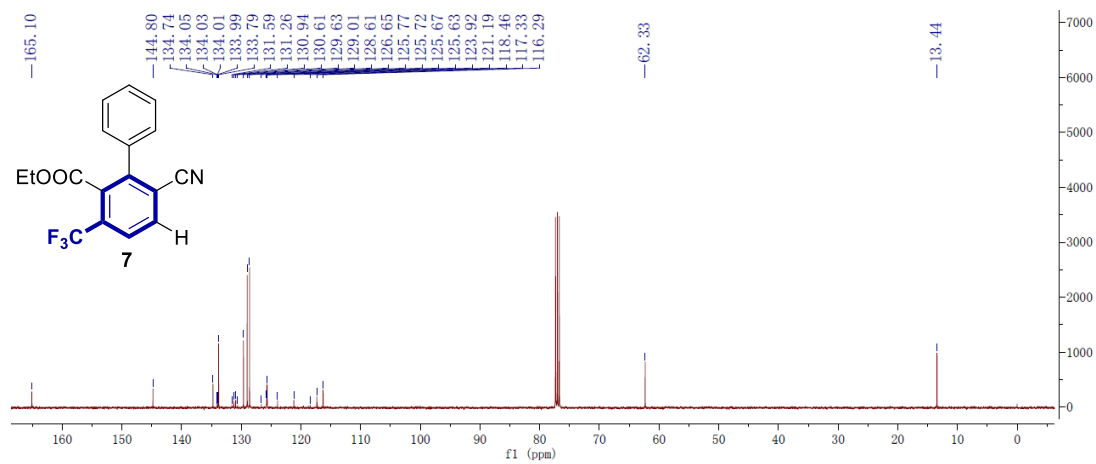

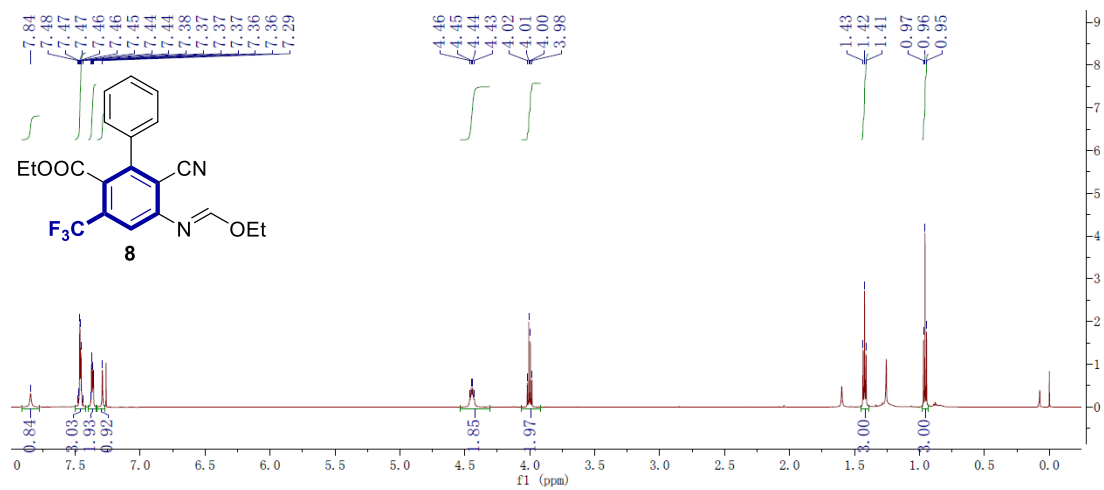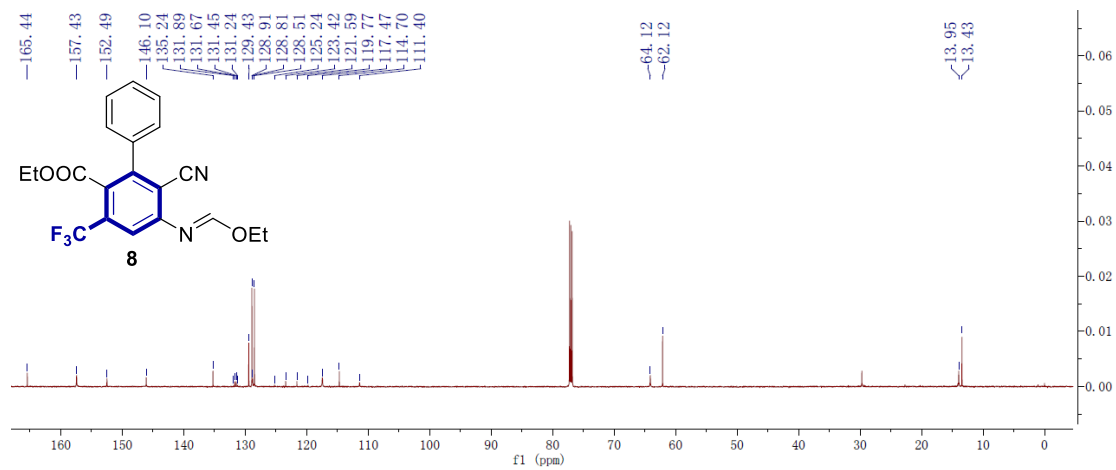

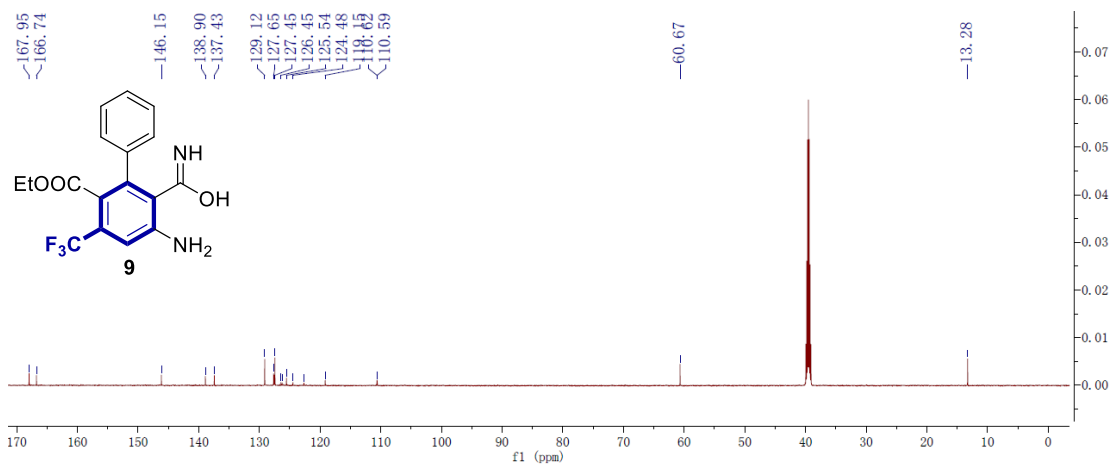

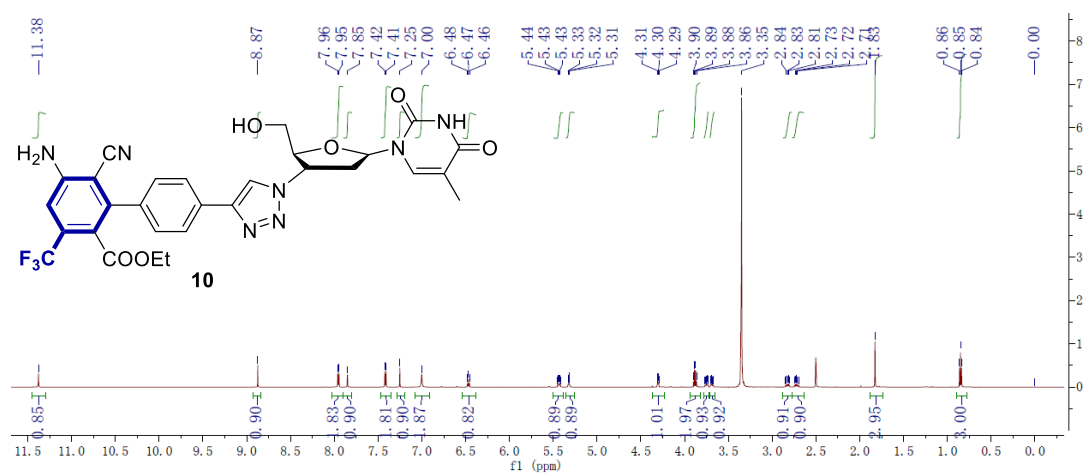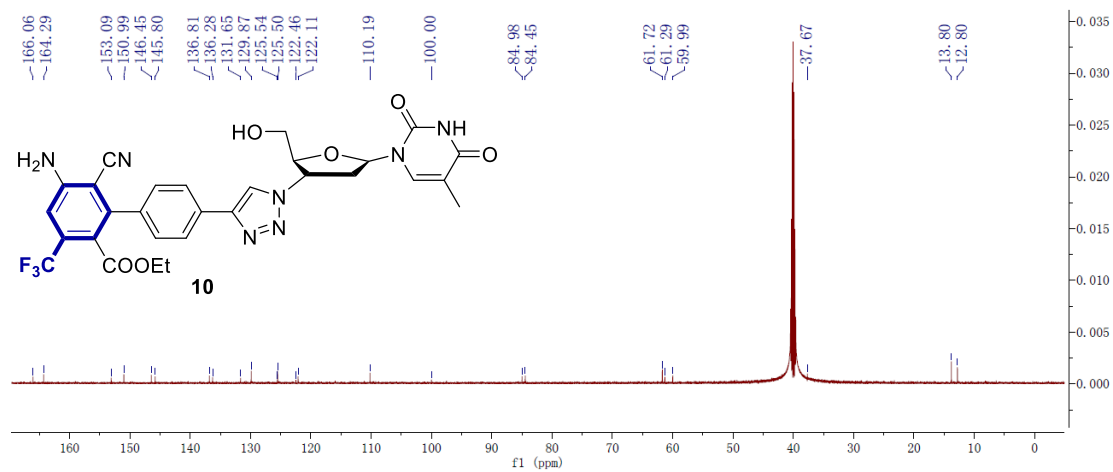

Supplement: c9qo01436e1.pdf [file c9qo01436e1.pdf]
